# Supplementary material for: Discovery of Biomarkers Predictive of GSI Response in Triple-Negative Breast Cancer and Adenoid Cystic Carcinoma
Source: Oxford University Press journal article supplement (doi:10.1158/2159-8290.cd-13-0830), 2014-08-08
Supplement: 21598290cd130830-sup-121904_2_supp_2520777_n7c21f.xls [file 21598290cd130830-sup-121904_2_supp_2520777_n7c21f.xls]

## Sheet: Coverage_tumors
Barcode	GeneName	Position (HG18)	Coverage	SOOTissueType	HistologyType	log10Coverage	NormValues
DS-35977	NOTCH1	9:139390523-139392010	66.92	Breast	Carcinoma, Ductal	1.82556	-0.0376505
DS-35977	NOTCH1	9:139393351-139393448	509.73	Breast	Carcinoma, Ductal	2.70734	-0.255892
DS-35977	NOTCH1	9:139393564-139393711	91.41	Breast	Carcinoma, Ductal	1.96099	0.367281
DS-35977	NOTCH1	9:139395004-139395299	64.25	Breast	Carcinoma, Ductal	1.80787	0.321441
DS-35977	NOTCH1	9:139396200-139396365	25.16	Breast	Carcinoma, Ductal	1.40071	-1.36083
DS-35977	NOTCH1	9:139396453-139396540	96.41	Breast	Carcinoma, Ductal	1.98412	1.20374
DS-35977	NOTCH1	9:139396724-139396940	50.9	Breast	Carcinoma, Ductal	1.70672	0.290975
DS-35977	NOTCH1	9:139397634-139397782	142.82	Breast	Carcinoma, Ductal	2.15479	1.59041
DS-35977	NOTCH1	9:139399125-139399556	35.82	Breast	Carcinoma, Ductal	1.55413	1.35066
DS-35977	NOTCH1	9:139399762-139400333	57.52	Breast	Carcinoma, Ductal	1.75982	0.7268
DS-35977	NOTCH1	9:139400979-139401091	42.48	Breast	Carcinoma, Ductal	1.62818	0.839847
DS-35977	NOTCH1	9:139401168-139401425	33.37	Breast	Carcinoma, Ductal	1.52336	-0.0671807
DS-35977	NOTCH1	9:139401757-139401889	27.89	Breast	Carcinoma, Ductal	1.44545	0.682918
DS-35977	NOTCH1	9:139402407-139402591	62.83	Breast	Carcinoma, Ductal	1.79817	-0.14948
DS-35977	NOTCH1	9:139402684-139402837	109.12	Breast	Carcinoma, Ductal	2.0379	2.02242
DS-35977	NOTCH1	9:139403322-139403523	9.5	Breast	Carcinoma, Ductal	0.977724	-0.555681
DS-35977	NOTCH1	9:139404185-139404413	147.51	Breast	Carcinoma, Ductal	2.16882	0.293635
DS-35977	NOTCH1	9:139405105-139405257	62.27	Breast	Carcinoma, Ductal	1.79428	-0.491729
DS-35977	NOTCH1	9:139405604-139405723	129.29	Breast	Carcinoma, Ductal	2.11156	1.38783
DS-35977	NOTCH1	9:139407473-139407586	313.83	Breast	Carcinoma, Ductal	2.49669	1.25008
DS-35977	NOTCH1	9:139407844-139407989	108.25	Breast	Carcinoma, Ductal	2.03443	0.750867
DS-35977	NOTCH1	9:139408962-139409154	28.26	Breast	Carcinoma, Ductal	1.45117	-1.43859
DS-35977	NOTCH1	9:139409742-139409852	255.05	Breast	Carcinoma, Ductal	2.40663	1.74701
DS-35977	NOTCH1	9:139409935-139410168	35.63	Breast	Carcinoma, Ductal	1.55182	0.902279
DS-35977	NOTCH1	9:139410433-139410546	151.66	Breast	Carcinoma, Ductal	2.18087	-0.592257
DS-35977	NOTCH1	9:139411724-139411837	37.97	Breast	Carcinoma, Ductal	1.57944	0.486158
DS-35977	NOTCH1	9:139412204-139412389	192.66	Breast	Carcinoma, Ductal	2.28479	0.354834
DS-35977	NOTCH1	9:139412589-139412744	38.91	Breast	Carcinoma, Ductal	1.59006	-0.37984
DS-35977	NOTCH1	9:139413043-139413276	131.89	Breast	Carcinoma, Ductal	2.12021	0.0560211
DS-35977	NOTCH1	9:139413895-139414017	228.91	Breast	Carcinoma, Ductal	2.35966	0.567759
DS-35977	NOTCH1	9:139417302-139417640	21.03	Breast	Carcinoma, Ductal	1.32284	2.24055
DS-35977	NOTCH1	9:139418169-139418431	30.89	Breast	Carcinoma, Ductal	1.48982	0.0847138
DS-35977	NOTCH1	9:139438476-139438554	19.89	Breast	Carcinoma, Ductal	1.29863	0.0822004
DS-35977	NOTCH1	9:139440178-139440238	1.34	Breast	Carcinoma, Ductal	0.127105	-1.13775
DS-35977	NOTCH2	1:120457929-120459317	133.4	Breast	Carcinoma, Ductal	2.12516	-0.115806
DS-35977	NOTCH2	1:120460288-120460385	121.42	Breast	Carcinoma, Ductal	2.08429	0.222434
DS-35977	NOTCH2	1:120461029-120461176	146.28	Breast	Carcinoma, Ductal	2.16518	-0.333477
DS-35977	NOTCH2	1:120461935-120462236	81.98	Breast	Carcinoma, Ductal	1.91371	-0.724382
DS-35977	NOTCH2	1:120462852-120463020	135.88	Breast	Carcinoma, Ductal	2.13316	-0.288127
DS-35977	NOTCH2	1:120464336-120464432	153.01	Breast	Carcinoma, Ductal	2.18472	0.288185
DS-35977	NOTCH2	1:120464859-120465069	126.93	Breast	Carcinoma, Ductal	2.10356	-0.777225
DS-35977	NOTCH2	1:120465259-120465401	60.61	Breast	Carcinoma, Ductal	1.78254	-0.484137
DS-35977	NOTCH2	1:120466260-120466607	84.23	Breast	Carcinoma, Ductal	1.92547	-0.0965855
DS-35977	NOTCH2	1:120467928-120468433	187.35	Breast	Carcinoma, Ductal	2.27265	-0.432031
DS-35977	NOTCH2	1:120469122-120469234	41.76	Breast	Carcinoma, Ductal	1.62076	0.136706
DS-35977	NOTCH2	1:120471599-120471835	123.94	Breast	Carcinoma, Ductal	2.09321	-0.581911
DS-35977	NOTCH2	1:120478042-120478227	73.11	Breast	Carcinoma, Ductal	1.86398	0.613099
DS-35977	NOTCH2	1:120479905-120480089	153.51	Breast	Carcinoma, Ductal	2.18614	-0.446646
DS-35977	NOTCH2	1:120480480-120480633	116.81	Breast	Carcinoma, Ductal	2.06748	0.281069
DS-35977	NOTCH2	1:120483178-120483379	94.65	Breast	Carcinoma, Ductal	1.97612	1.8648
DS-35977	NOTCH2	1:120484149-120484377	112.05	Breast	Carcinoma, Ductal	2.04941	0.669504
DS-35977	NOTCH2	1:120491037-120491189	218.09	Breast	Carcinoma, Ductal	2.33864	-0.358286
DS-35977	NOTCH2	1:120491630-120491749	264.64	Breast	Carcinoma, Ductal	2.42266	0.512834
DS-35977	NOTCH2	1:120493347-120493460	277.73	Breast	Carcinoma, Ductal	2.44362	0.163091
DS-35977	NOTCH2	1:120496166-120496311	272.92	Breast	Carcinoma, Ductal	2.43604	0.509946
DS-35977	NOTCH2	1:120497663-120497855	204.24	Breast	Carcinoma, Ductal	2.31014	0.631494
DS-35977	NOTCH2	1:120502015-120502125	119.04	Breast	Carcinoma, Ductal	2.07569	0.42301
DS-35977	NOTCH2	1:120506197-120506430	51.39	Breast	Carcinoma, Ductal	1.71088	-0.0831536
DS-35977	NOTCH2	1:120508076-120508189	37.77	Breast	Carcinoma, Ductal	1.57715	-0.704054
DS-35977	NOTCH2	1:120508999-120509112	307.29	Breast	Carcinoma, Ductal	2.48755	0.325713
DS-35977	NOTCH2	1:120510056-120510244	141.38	Breast	Carcinoma, Ductal	2.15039	-0.0911482
DS-35977	NOTCH2	1:120510700-120510855	123.18	Breast	Carcinoma, Ductal	2.09054	0.303328
DS-35977	NOTCH2	1:120512134-120512367	122.7	Breast	Carcinoma, Ductal	2.08884	-0.453013
DS-35977	NOTCH2	1:120529583-120529705	110.79	Breast	Carcinoma, Ductal	2.0445	0.0701616
DS-35977	NOTCH2	1:120539620-120539955	172.88	Breast	Carcinoma, Ductal	2.23774	-0.516798
DS-35977	NOTCH2	1:120547952-120548211	233.92	Breast	Carcinoma, Ductal	2.36907	-0.423055
DS-35977	NOTCH2	1:120572529-120572610	3.48	Breast	Carcinoma, Ductal	0.541579	-0.183333
DS-35977	NOTCH2	1:120611948-120612020	37.26	Breast	Carcinoma, Ductal	1.57124	-0.010146
DS-48911	NOTCH1	9:139390523-139392010	42.53	Breast	Carcinoma, NOS	1.6287	0.763231
DS-48911	NOTCH1	9:139393351-139393448	321.01	Breast	Carcinoma, NOS	2.50652	0.417465
DS-48911	NOTCH1	9:139393564-139393711	51.67	Breast	Carcinoma, NOS	1.71324	0.285311
DS-48911	NOTCH1	9:139395004-139395299	40.23	Breast	Carcinoma, NOS	1.60455	0.919177
DS-48911	NOTCH1	9:139396200-139396365	14.89	Breast	Carcinoma, NOS	1.17289	-1.19906
DS-48911	NOTCH1	9:139396453-139396540	58.44	Breast	Carcinoma, NOS	1.76671	1.45086
DS-48911	NOTCH1	9:139396724-139396940	31.45	Breast	Carcinoma, NOS	1.49762	0.659838
DS-48911	NOTCH1	9:139397634-139397782	62.67	Breast	Carcinoma, NOS	1.79706	-0.305317
DS-48911	NOTCH1	9:139399125-139399556	17.91	Breast	Carcinoma, NOS	1.2531	0.62512
DS-48911	NOTCH1	9:139399762-139400333	31.63	Breast	Carcinoma, NOS	1.5001	0.302722
DS-48911	NOTCH1	9:139400979-139401091	21.52	Breast	Carcinoma, NOS	1.33284	0.315354
DS-48911	NOTCH1	9:139401168-139401425	22.99	Breast	Carcinoma, NOS	1.36154	1.15992
DS-48911	NOTCH1	9:139401757-139401889	12.07	Breast	Carcinoma, NOS	1.08171	-0.572225
DS-48911	NOTCH1	9:139402407-139402591	36.53	Breast	Carcinoma, NOS	1.56265	-0.0576045
DS-48911	NOTCH1	9:139402684-139402837	53.82	Breast	Carcinoma, NOS	1.73094	0.840348
DS-48911	NOTCH1	9:139403322-139403523	6.14	Breast	Carcinoma, NOS	0.788168	-0.138241
DS-48911	NOTCH1	9:139404185-139404413	84.86	Breast	Carcinoma, NOS	1.9287	0.318216
DS-48911	NOTCH1	9:139405105-139405257	34.51	Breast	Carcinoma, NOS	1.53794	-0.735059
DS-48911	NOTCH1	9:139405604-139405723	60.43	Breast	Carcinoma, NOS	1.78125	-0.444433
DS-48911	NOTCH1	9:139407473-139407586	166.76	Breast	Carcinoma, NOS	2.22209	0.815978
DS-48911	NOTCH1	9:139407844-139407989	72.94	Breast	Carcinoma, NOS	1.86297	1.73449
DS-48911	NOTCH1	9:139408962-139409154	21.97	Breast	Carcinoma, NOS	1.34183	0.140767
DS-48911	NOTCH1	9:139409742-139409852	139.13	Breast	Carcinoma, NOS	2.14342	1.36343
DS-48911	NOTCH1	9:139409935-139410168	17	Breast	Carcinoma, NOS	1.23045	-0.178912
DS-48911	NOTCH1	9:139410433-139410546	108.57	Breast	Carcinoma, NOS	2.03571	1.1778
DS-48911	NOTCH1	9:139411724-139411837	27.11	Breast	Carcinoma, NOS	1.43313	1.4498
DS-48911	NOTCH1	9:139412204-139412389	115.29	Breast	Carcinoma, NOS	2.06179	0.763922
DS-48911	NOTCH1	9:139412589-139412744	28.45	Breast	Carcinoma, NOS	1.45408	0.995551
DS-48911	NOTCH1	9:139413043-139413276	91.18	Breast	Carcinoma, NOS	1.9599	1.84045
DS-48911	NOTCH1	9:139413895-139414017	150.35	Breast	Carcinoma, NOS	2.1771	1.58131
DS-48911	NOTCH1	9:139417302-139417640	6.74	Breast	Carcinoma, NOS	0.82866	-0.746535
DS-48911	NOTCH1	9:139418169-139418431	16.54	Breast	Carcinoma, NOS	1.21854	-0.374806
DS-48911	NOTCH1	9:139438476-139438554	8.57	Breast	Carcinoma, NOS	0.932981	-0.888579
DS-48911	NOTCH1	9:139440178-139440238	0.97	Breast	Carcinoma, NOS	-0.0132283	-1.01966
DS-48911	NOTCH2	1:120457929-120459317	122.13	Breast	Carcinoma, NOS	2.08682	-0.41917
DS-48911	NOTCH2	1:120460288-120460385	135.46	Breast	Carcinoma, NOS	2.13181	0.549083
DS-48911	NOTCH2	1:120461029-120461176	151.55	Breast	Carcinoma, NOS	2.18056	-0.0877039
DS-48911	NOTCH2	1:120461935-120462236	91.76	Breast	Carcinoma, NOS	1.96265	-0.284471
DS-48911	NOTCH2	1:120462852-120463020	123.01	Breast	Carcinoma, NOS	2.08994	-0.646814
DS-48911	NOTCH2	1:120464336-120464432	154.28	Breast	Carcinoma, NOS	2.18831	0.318322
DS-48911	NOTCH2	1:120464859-120465069	150.01	Breast	Carcinoma, NOS	2.17612	-0.091606
DS-48911	NOTCH2	1:120465259-120465401	55.34	Breast	Carcinoma, NOS	1.74304	-0.803213
DS-48911	NOTCH2	1:120466260-120466607	84.5	Breast	Carcinoma, NOS	1.92686	-0.0377408
DS-48911	NOTCH2	1:120467928-120468433	181.81	Breast	Carcinoma, NOS	2.25962	-0.550328
DS-48911	NOTCH2	1:120469122-120469234	42.21	Breast	Carcinoma, NOS	1.62542	0.20942
DS-48911	NOTCH2	1:120471599-120471835	133.51	Breast	Carcinoma, NOS	2.12551	-0.1944
DS-48911	NOTCH2	1:120478042-120478227	70.49	Breast	Carcinoma, NOS	1.84813	0.500645
DS-48911	NOTCH2	1:120479905-120480089	149.42	Breast	Carcinoma, NOS	2.17441	-0.520825
DS-48911	NOTCH2	1:120480480-120480633	112.12	Breast	Carcinoma, NOS	2.04968	0.106983
DS-48911	NOTCH2	1:120483178-120483379	80.34	Breast	Carcinoma, NOS	1.90493	1.01066
DS-48911	NOTCH2	1:120484149-120484377	105.91	Breast	Carcinoma, NOS	2.02494	0.489037
DS-48911	NOTCH2	1:120491037-120491189	239.02	Breast	Carcinoma, NOS	2.37843	0.306691
DS-48911	NOTCH2	1:120491630-120491749	253.03	Breast	Carcinoma, NOS	2.40317	0.38243
DS-48911	NOTCH2	1:120493347-120493460	300.67	Breast	Carcinoma, NOS	2.47809	0.898197
DS-48911	NOTCH2	1:120496166-120496311	249.39	Breast	Carcinoma, NOS	2.39688	0.352516
DS-48911	NOTCH2	1:120497663-120497855	191.77	Breast	Carcinoma, NOS	2.28278	0.153477
DS-48911	NOTCH2	1:120502015-120502125	124.13	Breast	Carcinoma, NOS	2.09388	0.483333
DS-48911	NOTCH2	1:120506197-120506430	48.3	Breast	Carcinoma, NOS	1.68395	-0.326008
DS-48911	NOTCH2	1:120508076-120508189	47.25	Breast	Carcinoma, NOS	1.6744	0.174732
DS-48911	NOTCH2	1:120508999-120509112	325.74	Breast	Carcinoma, NOS	2.51287	0.517261
DS-48911	NOTCH2	1:120510056-120510244	162.46	Breast	Carcinoma, NOS	2.21075	0.640533
DS-48911	NOTCH2	1:120510700-120510855	113.12	Breast	Carcinoma, NOS	2.05354	-0.166726
DS-48911	NOTCH2	1:120512134-120512367	137.34	Breast	Carcinoma, NOS	2.1378	0.0175806
DS-48911	NOTCH2	1:120529583-120529705	126.78	Breast	Carcinoma, NOS	2.10305	0.351229
DS-48911	NOTCH2	1:120539620-120539955	161.59	Breast	Carcinoma, NOS	2.20841	-0.780808
DS-48911	NOTCH2	1:120547952-120548211	211.47	Breast	Carcinoma, NOS	2.32525	-0.758054
DS-48911	NOTCH2	1:120572529-120572610	2.44	Breast	Carcinoma, NOS	0.38739	-0.34899
DS-48911	NOTCH2	1:120611948-120612020	33.18	Breast	Carcinoma, NOS	1.52088	-0.202718
DS-49798	NOTCH1	9:139390523-139392010	89.53	Breast	Carcinoma, NOS	1.95197	0.5932
DS-49798	NOTCH1	9:139393351-139393448	682.95	Breast	Carcinoma, NOS	2.83439	0.336909
DS-49798	NOTCH1	9:139393564-139393711	96.49	Breast	Carcinoma, NOS	1.98448	-0.501829
DS-49798	NOTCH1	9:139395004-139395299	77.29	Breast	Carcinoma, NOS	1.88812	0.146731
DS-49798	NOTCH1	9:139396200-139396365	56.99	Breast	Carcinoma, NOS	1.7558	1.79047
DS-49798	NOTCH1	9:139396453-139396540	96.94	Breast	Carcinoma, NOS	1.9865	0.285257
DS-49798	NOTCH1	9:139396724-139396940	72.45	Breast	Carcinoma, NOS	1.86004	0.999452
DS-49798	NOTCH1	9:139397634-139397782	163.56	Breast	Carcinoma, NOS	2.21368	1.06136
DS-49798	NOTCH1	9:139399125-139399556	44.44	Breast	Carcinoma, NOS	1.64777	1.37841
DS-49798	NOTCH1	9:139399762-139400333	77.12	Breast	Carcinoma, NOS	1.88717	1.55763
DS-49798	NOTCH1	9:139400979-139401091	50.12	Breast	Carcinoma, NOS	1.70001	0.650026
DS-49798	NOTCH1	9:139401168-139401425	52.79	Breast	Carcinoma, NOS	1.72255	1.59644
DS-49798	NOTCH1	9:139401757-139401889	19.25	Breast	Carcinoma, NOS	1.28443	-1.90539
DS-49798	NOTCH1	9:139402407-139402591	97.77	Breast	Carcinoma, NOS	1.99021	1.4354
DS-49798	NOTCH1	9:139402684-139402837	116.07	Breast	Carcinoma, NOS	2.06472	0.859392
DS-49798	NOTCH1	9:139403322-139403523	21.77	Breast	Carcinoma, NOS	1.33786	1.61032
DS-49798	NOTCH1	9:139404185-139404413	198.67	Breast	Carcinoma, NOS	2.29813	1.0489
DS-49798	NOTCH1	9:139405105-139405257	81.86	Breast	Carcinoma, NOS	1.91307	-0.0462302
DS-49798	NOTCH1	9:139405604-139405723	148.47	Breast	Carcinoma, NOS	2.17164	0.743316
DS-49798	NOTCH1	9:139407473-139407586	394.46	Breast	Carcinoma, NOS	2.596	1.35378
DS-49798	NOTCH1	9:139407844-139407989	136.44	Breast	Carcinoma, NOS	2.13494	0.879611
DS-49798	NOTCH1	9:139408962-139409154	57.93	Breast	Carcinoma, NOS	1.7629	1.19782
DS-49798	NOTCH1	9:139409742-139409852	268.38	Breast	Carcinoma, NOS	2.42875	0.531541
DS-49798	NOTCH1	9:139409935-139410168	35.62	Breast	Carcinoma, NOS	1.55169	-0.333959
DS-49798	NOTCH1	9:139410433-139410546	258.77	Breast	Carcinoma, NOS	2.41291	1.99637
DS-49798	NOTCH1	9:139411724-139411837	34.94	Breast	Carcinoma, NOS	1.54332	-0.806416
DS-49798	NOTCH1	9:139412204-139412389	273.47	Breast	Carcinoma, NOS	2.43691	1.70897
DS-49798	NOTCH1	9:139412589-139412744	52.44	Breast	Carcinoma, NOS	1.71966	0.119226
DS-49798	NOTCH1	9:139413043-139413276	172.22	Breast	Carcinoma, NOS	2.23608	0.595611
DS-49798	NOTCH1	9:139413895-139414017	258.35	Breast	Carcinoma, NOS	2.41221	-0.10152
DS-49798	NOTCH1	9:139417302-139417640	18.97	Breast	Carcinoma, NOS	1.27807	0.632112
DS-49798	NOTCH1	9:139418169-139418431	40.45	Breast	Carcinoma, NOS	1.60692	0.479836
DS-49798	NOTCH1	9:139438476-139438554	22.38	Breast	Carcinoma, NOS	1.34986	-0.231295
DS-49798	NOTCH1	9:139440178-139440238	0.61	Breast	Carcinoma, NOS	-0.21467	-1.6441
DS-49798	NOTCH2	1:120457929-120459317	173.17	Breast	Carcinoma, NOS	2.23847	2.10754
DS-49798	NOTCH2	1:120460288-120460385	30.38	Breast	Carcinoma, NOS	1.48259	-2.72903
DS-49798	NOTCH2	1:120461029-120461176	133.88	Breast	Carcinoma, NOS	2.12672	1.14469
DS-49798	NOTCH2	1:120461935-120462236	104.53	Breast	Carcinoma, NOS	2.01924	1.42848
DS-49798	NOTCH2	1:120462852-120463020	172.37	Breast	Carcinoma, NOS	2.23646	1.93479
DS-49798	NOTCH2	1:120464336-120464432	15.44	Breast	Carcinoma, NOS	1.18865	-3.74495
DS-49798	NOTCH2	1:120464859-120465069	197.08	Breast	Carcinoma, NOS	2.29464	2.30495
DS-49798	NOTCH2	1:120465259-120465401	79.97	Breast	Carcinoma, NOS	1.90293	1.84116
DS-49798	NOTCH2	1:120466260-120466607	92.94	Breast	Carcinoma, NOS	1.9682	2.60603
DS-49798	NOTCH2	1:120467928-120468433	231.67	Breast	Carcinoma, NOS	2.36487	2.32486
DS-49798	NOTCH2	1:120469122-120469234	50.54	Breast	Carcinoma, NOS	1.70364	2.39815
DS-49798	NOTCH2	1:120471599-120471835	144.72	Breast	Carcinoma, NOS	2.16053	1.79244
DS-49798	NOTCH2	1:120478042-120478227	22.62	Breast	Carcinoma, NOS	1.35449	-2.49507
DS-49798	NOTCH2	1:120479905-120480089	203.2	Breast	Carcinoma, NOS	2.30792	1.77833
DS-49798	NOTCH2	1:120480480-120480633	50.86	Breast	Carcinoma, NOS	1.70638	-2.19087
DS-49798	NOTCH2	1:120483178-120483379	48.21	Breast	Carcinoma, NOS	1.68314	0.0486154
DS-49798	NOTCH2	1:120484149-120484377	36.85	Breast	Carcinoma, NOS	1.56644	-2.11773
DS-49798	NOTCH2	1:120491037-120491189	240.44	Breast	Carcinoma, NOS	2.38101	2.60848
DS-49798	NOTCH2	1:120491630-120491749	81.51	Breast	Carcinoma, NOS	1.91121	-2.32391
DS-49798	NOTCH2	1:120493347-120493460	174.33	Breast	Carcinoma, NOS	2.24137	-0.919012
DS-49798	NOTCH2	1:120496166-120496311	31.04	Breast	Carcinoma, NOS	1.49192	-2.9351
DS-49798	NOTCH2	1:120497663-120497855	168.89	Breast	Carcinoma, NOS	2.2276	1.89267
DS-49798	NOTCH2	1:120502015-120502125	5.38	Breast	Carcinoma, NOS	0.730782	-3.02734
DS-49798	NOTCH2	1:120506197-120506430	56.77	Breast	Carcinoma, NOS	1.75412	1.83219
DS-49798	NOTCH2	1:120508076-120508189	15.12	Breast	Carcinoma, NOS	1.17955	-2.90204
DS-49798	NOTCH2	1:120508999-120509112	109.71	Breast	Carcinoma, NOS	2.04025	-1.72007
DS-49798	NOTCH2	1:120510056-120510244	75.77	Breast	Carcinoma, NOS	1.8795	-1.52214
DS-49798	NOTCH2	1:120510700-120510855	83.42	Breast	Carcinoma, NOS	1.92127	0.00404575
DS-49798	NOTCH2	1:120512134-120512367	151.61	Breast	Carcinoma, NOS	2.18073	1.72545
DS-49798	NOTCH2	1:120529583-120529705	27.82	Breast	Carcinoma, NOS	1.44436	-2.00537
DS-49798	NOTCH2	1:120539620-120539955	274.99	Breast	Carcinoma, NOS	2.43932	2.95021
DS-49798	NOTCH2	1:120547952-120548211	426	Breast	Carcinoma, NOS	2.62941	2.90355
DS-49798	NOTCH2	1:120572529-120572610	0	Breast	Carcinoma, NOS		1.45847
DS-49798	NOTCH2	1:120611948-120612020	59.89	Breast	Carcinoma, NOS	1.77735	1.41984
DS-50716	NOTCH1	9:139390523-139392010	119.26	Breast	Carcinoma, Ductal	2.07649	0.0358173
DS-50716	NOTCH1	9:139393351-139393448	908.67	Breast	Carcinoma, Ductal	2.95841	-0.185974
DS-50716	NOTCH1	9:139393564-139393711	151.16	Breast	Carcinoma, Ductal	2.17944	0.00346173
DS-50716	NOTCH1	9:139395004-139395299	117.35	Breast	Carcinoma, Ductal	2.06948	0.553313
DS-50716	NOTCH1	9:139396200-139396365	50.04	Breast	Carcinoma, Ductal	1.69932	-0.742459
DS-50716	NOTCH1	9:139396453-139396540	130.68	Breast	Carcinoma, Ductal	2.11621	0.0191056
DS-50716	NOTCH1	9:139396724-139396940	93.67	Breast	Carcinoma, Ductal	1.9716	0.497103
DS-50716	NOTCH1	9:139397634-139397782	224.44	Breast	Carcinoma, Ductal	2.3511	0.767029
DS-50716	NOTCH1	9:139399125-139399556	52.07	Breast	Carcinoma, Ductal	1.71659	0.324591
DS-50716	NOTCH1	9:139399762-139400333	101.83	Breast	Carcinoma, Ductal	2.00788	0.754497
DS-50716	NOTCH1	9:139400979-139401091	60.8	Breast	Carcinoma, Ductal	1.7839	-0.0455464
DS-50716	NOTCH1	9:139401168-139401425	61.03	Breast	Carcinoma, Ductal	1.78554	0.169331
DS-50716	NOTCH1	9:139401757-139401889	63.01	Breast	Carcinoma, Ductal	1.79941	1.78131
DS-50716	NOTCH1	9:139402407-139402591	124.98	Breast	Carcinoma, Ductal	2.09684	0.666254
DS-50716	NOTCH1	9:139402684-139402837	148.22	Breast	Carcinoma, Ductal	2.17091	-0.0289508
DS-50716	NOTCH1	9:139403322-139403523	22.52	Breast	Carcinoma, Ductal	1.35257	0.475767
DS-50716	NOTCH1	9:139404185-139404413	248.54	Breast	Carcinoma, Ductal	2.3954	-0.110073
DS-50716	NOTCH1	9:139405105-139405257	115	Breast	Carcinoma, Ductal	2.0607	-0.173988
DS-50716	NOTCH1	9:139405604-139405723	196.45	Breast	Carcinoma, Ductal	2.29325	0.0455366
DS-50716	NOTCH1	9:139407473-139407586	431.26	Breast	Carcinoma, Ductal	2.63474	-0.170584
DS-50716	NOTCH1	9:139407844-139407989	151.29	Breast	Carcinoma, Ductal	2.17981	-0.67726
DS-50716	NOTCH1	9:139408962-139409154	61.38	Breast	Carcinoma, Ductal	1.78803	-0.36188
DS-50716	NOTCH1	9:139409742-139409852	405.31	Breast	Carcinoma, Ductal	2.60779	0.944864
DS-50716	NOTCH1	9:139409935-139410168	62.7	Breast	Carcinoma, Ductal	1.79727	0.883285
DS-50716	NOTCH1	9:139410433-139410546	299.2	Breast	Carcinoma, Ductal	2.47596	0.295292
DS-50716	NOTCH1	9:139411724-139411837	75.83	Breast	Carcinoma, Ductal	1.87984	1.02904
DS-50716	NOTCH1	9:139412204-139412389	348.22	Breast	Carcinoma, Ductal	2.54185	0.582293
DS-50716	NOTCH1	9:139412589-139412744	77.66	Breast	Carcinoma, Ductal	1.8902	0.315577
DS-50716	NOTCH1	9:139413043-139413276	257.48	Breast	Carcinoma, Ductal	2.41074	1.01768
DS-50716	NOTCH1	9:139413895-139414017	379.01	Breast	Carcinoma, Ductal	2.57865	0.0872661
DS-50716	NOTCH1	9:139417302-139417640	25.5	Breast	Carcinoma, Ductal	1.40654	0.312893
DS-50716	NOTCH1	9:139418169-139418431	55.66	Breast	Carcinoma, Ductal	1.74554	0.220869
DS-50716	NOTCH1	9:139438476-139438554	40.01	Breast	Carcinoma, Ductal	1.60217	0.524839
DS-50716	NOTCH1	9:139440178-139440238	4.08	Breast	Carcinoma, Ductal	0.61066	-0.861052
DS-50716	NOTCH2	1:120457929-120459317	95.57	Breast	Carcinoma, Ductal	1.98032	2.62733
DS-50716	NOTCH2	1:120460288-120460385	20.5	Breast	Carcinoma, Ductal	1.31175	-1.76554
DS-50716	NOTCH2	1:120461029-120461176	38.75	Breast	Carcinoma, Ductal	1.58827	-1.82978
DS-50716	NOTCH2	1:120461935-120462236	71.6	Breast	Carcinoma, Ductal	1.85491	2.74566
DS-50716	NOTCH2	1:120462852-120463020	94.47	Breast	Carcinoma, Ductal	1.97529	2.44849
DS-50716	NOTCH2	1:120464336-120464432	24.12	Breast	Carcinoma, Ductal	1.38238	-1.30756
DS-50716	NOTCH2	1:120464859-120465069	70.77	Breast	Carcinoma, Ductal	1.84985	1.16077
DS-50716	NOTCH2	1:120465259-120465401	34.82	Breast	Carcinoma, Ductal	1.54183	1.47671
DS-50716	NOTCH2	1:120466260-120466607	37.74	Breast	Carcinoma, Ductal	1.5768	1.57894
DS-50716	NOTCH2	1:120467928-120468433	123.74	Breast	Carcinoma, Ductal	2.09251	2.8627
DS-50716	NOTCH2	1:120469122-120469234	15.56	Breast	Carcinoma, Ductal	1.19201	0.508126
DS-50716	NOTCH2	1:120471599-120471835	91.43	Breast	Carcinoma, Ductal	1.96109	3.11546
DS-50716	NOTCH2	1:120478042-120478227	13.74	Breast	Carcinoma, Ductal	1.13799	-1.61408
DS-50716	NOTCH2	1:120479905-120480089	140.3	Breast	Carcinoma, Ductal	2.14706	3.08606
DS-50716	NOTCH2	1:120480480-120480633	16.58	Breast	Carcinoma, Ductal	1.21958	-4.13095
DS-50716	NOTCH2	1:120483178-120483379	16	Breast	Carcinoma, Ductal	1.20412	-1.94703
DS-50716	NOTCH2	1:120484149-120484377	10	Breast	Carcinoma, Ductal	1	-4.17232
DS-50716	NOTCH2	1:120491037-120491189	85.69	Breast	Carcinoma, Ductal	1.93293	0.593096
DS-50716	NOTCH2	1:120491630-120491749	49.56	Breast	Carcinoma, Ductal	1.69513	-1.52086
DS-50716	NOTCH2	1:120493347-120493460	76.57	Breast	Carcinoma, Ductal	1.88406	-1.67341
DS-50716	NOTCH2	1:120496166-120496311	34.9	Breast	Carcinoma, Ductal	1.54283	-1.33497
DS-50716	NOTCH2	1:120497663-120497855	63.35	Breast	Carcinoma, Ductal	1.80175	-0.1807
DS-50716	NOTCH2	1:120502015-120502125	3.45	Breast	Carcinoma, Ductal	0.537819	-2.66383
DS-50716	NOTCH2	1:120506197-120506430	27.18	Breast	Carcinoma, Ductal	1.43425	1.82465
DS-50716	NOTCH2	1:120508076-120508189	8.01	Breast	Carcinoma, Ductal	0.903633	-2.52244
DS-50716	NOTCH2	1:120508999-120509112	29.04	Breast	Carcinoma, Ductal	1.463	-3.48128
DS-50716	NOTCH2	1:120510056-120510244	27.74	Breast	Carcinoma, Ductal	1.44311	-2.88177
DS-50716	NOTCH2	1:120510700-120510855	20.56	Breast	Carcinoma, Ductal	1.31302	-3.96408
DS-50716	NOTCH2	1:120512134-120512367	99.94	Breast	Carcinoma, Ductal	1.99974	2.98267
DS-50716	NOTCH2	1:120529583-120529705	7.59	Breast	Carcinoma, Ductal	0.880242	-3.12868
DS-50716	NOTCH2	1:120539620-120539955	87.71	Breast	Carcinoma, Ductal	1.94305	1.19056
DS-50716	NOTCH2	1:120547952-120548211	203.1	Breast	Carcinoma, Ductal	2.30771	2.88249
DS-50716	NOTCH2	1:120572529-120572610	0	Breast	Carcinoma, Ductal		1.45847
DS-50716	NOTCH2	1:120611948-120612020	80.56	Breast	Carcinoma, Ductal	1.90612	3.23123
DS-50810	NOTCH1	9:139390523-139392010	48.61	Breast	Carcinoma, Ductal	1.68673	-0.541973
DS-50810	NOTCH1	9:139393351-139393448	399.31	Breast	Carcinoma, Ductal	2.60131	-0.176436
DS-50810	NOTCH1	9:139393564-139393711	58.3	Breast	Carcinoma, Ductal	1.76567	-0.714826
DS-50810	NOTCH1	9:139395004-139395299	39.66	Breast	Carcinoma, Ductal	1.59835	-1.22998
DS-50810	NOTCH1	9:139396200-139396365	24.6	Breast	Carcinoma, Ductal	1.39094	-0.153502
DS-50810	NOTCH1	9:139396453-139396540	58.01	Breast	Carcinoma, Ductal	1.7635	0.0703419
DS-50810	NOTCH1	9:139396724-139396940	33.22	Breast	Carcinoma, Ductal	1.5214	-0.561023
DS-50810	NOTCH1	9:139397634-139397782	83.71	Breast	Carcinoma, Ductal	1.92278	-0.383882
DS-50810	NOTCH1	9:139399125-139399556	19.18	Breast	Carcinoma, Ductal	1.28285	-0.600246
DS-50810	NOTCH1	9:139399762-139400333	42.59	Breast	Carcinoma, Ductal	1.62931	0.271962
DS-50810	NOTCH1	9:139400979-139401091	17.91	Breast	Carcinoma, Ductal	1.2531	-1.72755
DS-50810	NOTCH1	9:139401168-139401425	25.69	Breast	Carcinoma, Ductal	1.40976	-0.110061
DS-50810	NOTCH1	9:139401757-139401889	15.74	Breast	Carcinoma, Ductal	1.197	-0.72855
DS-50810	NOTCH1	9:139402407-139402591	47.72	Breast	Carcinoma, Ductal	1.6787	-0.285716
DS-50810	NOTCH1	9:139402684-139402837	62.05	Breast	Carcinoma, Ductal	1.79274	-0.398216
DS-50810	NOTCH1	9:139403322-139403523	5.06	Breast	Carcinoma, Ductal	0.704151	-1.86736
DS-50810	NOTCH1	9:139404185-139404413	118.31	Breast	Carcinoma, Ductal	2.07302	0.592452
DS-50810	NOTCH1	9:139405105-139405257	60.2	Breast	Carcinoma, Ductal	1.7796	1.06973
DS-50810	NOTCH1	9:139405604-139405723	94.6	Breast	Carcinoma, Ductal	1.97589	0.875776
DS-50810	NOTCH1	9:139407473-139407586	186.4	Breast	Carcinoma, Ductal	2.27045	-0.257056
DS-50810	NOTCH1	9:139407844-139407989	73.2	Breast	Carcinoma, Ductal	1.86451	-0.0809441
DS-50810	NOTCH1	9:139408962-139409154	27.5	Breast	Carcinoma, Ductal	1.43933	-0.254494
DS-50810	NOTCH1	9:139409742-139409852	165.24	Breast	Carcinoma, Ductal	2.21812	0.383098
DS-50810	NOTCH1	9:139409935-139410168	26.67	Breast	Carcinoma, Ductal	1.42602	0.69986
DS-50810	NOTCH1	9:139410433-139410546	142.36	Breast	Carcinoma, Ductal	2.15339	0.941112
DS-50810	NOTCH1	9:139411724-139411837	25.46	Breast	Carcinoma, Ductal	1.40586	-0.15027
DS-50810	NOTCH1	9:139412204-139412389	148.67	Breast	Carcinoma, Ductal	2.17222	0.315706
DS-50810	NOTCH1	9:139412589-139412744	30.48	Breast	Carcinoma, Ductal	1.48401	-0.317625
DS-50810	NOTCH1	9:139413043-139413276	97.27	Breast	Carcinoma, Ductal	1.98798	-0.415627
DS-50810	NOTCH1	9:139413895-139414017	179.1	Breast	Carcinoma, Ductal	2.2531	0.640917
DS-50810	NOTCH1	9:139417302-139417640	9.78	Breast	Carcinoma, Ductal	0.990339	-0.378641
DS-50810	NOTCH1	9:139418169-139418431	25.39	Breast	Carcinoma, Ductal	1.40466	0.478651
DS-50810	NOTCH1	9:139438476-139438554	12.72	Breast	Carcinoma, Ductal	1.10449	-0.56864
DS-50810	NOTCH1	9:139440178-139440238	0	Breast	Carcinoma, Ductal		0.798675
DS-50810	NOTCH2	1:120457929-120459317	117.78	Breast	Carcinoma, Ductal	2.07107	-0.630869
DS-50810	NOTCH2	1:120460288-120460385	149.65	Breast	Carcinoma, Ductal	2.17508	0.771209
DS-50810	NOTCH2	1:120461029-120461176	156.95	Breast	Carcinoma, Ductal	2.19576	-0.00462947
DS-50810	NOTCH2	1:120461935-120462236	87.87	Breast	Carcinoma, Ductal	1.94384	-0.521821
DS-50810	NOTCH2	1:120462852-120463020	141.64	Breast	Carcinoma, Ductal	2.15119	-0.184397
DS-50810	NOTCH2	1:120464336-120464432	183.55	Breast	Carcinoma, Ductal	2.26375	0.633731
DS-50810	NOTCH2	1:120464859-120465069	142.44	Breast	Carcinoma, Ductal	2.15363	-0.37901
DS-50810	NOTCH2	1:120465259-120465401	74.97	Breast	Carcinoma, Ductal	1.87489	0.262596
DS-50810	NOTCH2	1:120466260-120466607	85.73	Breast	Carcinoma, Ductal	1.93313	-0.0775794
DS-50810	NOTCH2	1:120467928-120468433	185.26	Breast	Carcinoma, Ductal	2.26778	-0.560863
DS-50810	NOTCH2	1:120469122-120469234	45.74	Breast	Carcinoma, Ductal	1.6603	0.462733
DS-50810	NOTCH2	1:120471599-120471835	122.98	Breast	Carcinoma, Ductal	2.08983	-0.689203
DS-50810	NOTCH2	1:120478042-120478227	65.77	Breast	Carcinoma, Ductal	1.81803	0.164266
DS-50810	NOTCH2	1:120479905-120480089	156.21	Breast	Carcinoma, Ductal	2.19371	-0.436368
DS-50810	NOTCH2	1:120480480-120480633	130.79	Breast	Carcinoma, Ductal	2.11657	0.775897
DS-50810	NOTCH2	1:120483178-120483379	56.83	Breast	Carcinoma, Ductal	1.75458	-0.979183
DS-50810	NOTCH2	1:120484149-120484377	98.9	Breast	Carcinoma, Ductal	1.9952	0.166538
DS-50810	NOTCH2	1:120491037-120491189	223.31	Breast	Carcinoma, Ductal	2.34891	-0.296649
DS-50810	NOTCH2	1:120491630-120491749	252.13	Breast	Carcinoma, Ductal	2.40162	0.299604
DS-50810	NOTCH2	1:120493347-120493460	281.39	Breast	Carcinoma, Ductal	2.44931	0.150399
DS-50810	NOTCH2	1:120496166-120496311	299.78	Breast	Carcinoma, Ductal	2.4768	0.658874
DS-50810	NOTCH2	1:120497663-120497855	189.75	Breast	Carcinoma, Ductal	2.27818	-0.112226
DS-50810	NOTCH2	1:120502015-120502125	126.34	Breast	Carcinoma, Ductal	2.10154	0.479254
DS-50810	NOTCH2	1:120506197-120506430	56.96	Breast	Carcinoma, Ductal	1.75557	0.302147
DS-50810	NOTCH2	1:120508076-120508189	53	Breast	Carcinoma, Ductal	1.72428	0.533203
DS-50810	NOTCH2	1:120508999-120509112	285.91	Breast	Carcinoma, Ductal	2.45623	0.0688466
DS-50810	NOTCH2	1:120510056-120510244	140.09	Breast	Carcinoma, Ductal	2.14641	-0.210672
DS-50810	NOTCH2	1:120510700-120510855	132.79	Breast	Carcinoma, Ductal	2.12317	0.664236
DS-50810	NOTCH2	1:120512134-120512367	149.48	Breast	Carcinoma, Ductal	2.17458	0.269755
DS-50810	NOTCH2	1:120529583-120529705	143.59	Breast	Carcinoma, Ductal	2.15712	0.557524
DS-50810	NOTCH2	1:120539620-120539955	163.92	Breast	Carcinoma, Ductal	2.21463	-0.80924
DS-50810	NOTCH2	1:120547952-120548211	216.89	Breast	Carcinoma, Ductal	2.33624	-0.742466
DS-50810	NOTCH2	1:120572529-120572610	2.51	Breast	Carcinoma, Ductal	0.399674	-0.345485
DS-50810	NOTCH2	1:120611948-120612020	28.6	Breast	Carcinoma, Ductal	1.45637	-0.500343
DS-50869	NOTCH1	9:139390523-139392010	74.12	Breast	Carcinoma, Ductal	1.86994	-0.925021
DS-50869	NOTCH1	9:139393351-139393448	573.01	Breast	Carcinoma, Ductal	2.75816	-0.967848
DS-50869	NOTCH1	9:139393564-139393711	90.97	Breast	Carcinoma, Ductal	1.9589	-0.859004
DS-50869	NOTCH1	9:139395004-139395299	72.06	Breast	Carcinoma, Ductal	1.85769	-0.36786
DS-50869	NOTCH1	9:139396200-139396365	52.51	Breast	Carcinoma, Ductal	1.72024	1.33797
DS-50869	NOTCH1	9:139396453-139396540	84.64	Breast	Carcinoma, Ductal	1.92758	-0.346836
DS-50869	NOTCH1	9:139396724-139396940	55.57	Breast	Carcinoma, Ductal	1.74484	-0.344313
DS-50869	NOTCH1	9:139397634-139397782	148.85	Breast	Carcinoma, Ductal	2.17275	0.356998
DS-50869	NOTCH1	9:139399125-139399556	35.74	Breast	Carcinoma, Ductal	1.55315	0.199939
DS-50869	NOTCH1	9:139399762-139400333	67.81	Breast	Carcinoma, Ductal	1.83129	0.214149
DS-50869	NOTCH1	9:139400979-139401091	45.26	Breast	Carcinoma, Ductal	1.65571	0.197239
DS-50869	NOTCH1	9:139401168-139401425	45.13	Breast	Carcinoma, Ductal	1.65447	0.510328
DS-50869	NOTCH1	9:139401757-139401889	41.87	Breast	Carcinoma, Ductal	1.6219	1.53184
DS-50869	NOTCH1	9:139402407-139402591	84.11	Breast	Carcinoma, Ductal	1.92485	0.370088
DS-50869	NOTCH1	9:139402684-139402837	117.15	Breast	Carcinoma, Ductal	2.06874	0.890221
DS-50869	NOTCH1	9:139403322-139403523	17.65	Breast	Carcinoma, Ductal	1.24674	0.857412
DS-50869	NOTCH1	9:139404185-139404413	155.22	Breast	Carcinoma, Ductal	2.19095	-1.13053
DS-50869	NOTCH1	9:139405105-139405257	94.93	Breast	Carcinoma, Ductal	1.9774	0.961175
DS-50869	NOTCH1	9:139405604-139405723	121.59	Breast	Carcinoma, Ductal	2.0849	-1.09087
DS-50869	NOTCH1	9:139407473-139407586	382.61	Breast	Carcinoma, Ductal	2.58276	1.15066
DS-50869	NOTCH1	9:139407844-139407989	138.75	Breast	Carcinoma, Ductal	2.14223	0.949699
DS-50869	NOTCH1	9:139408962-139409154	53.16	Breast	Carcinoma, Ductal	1.72558	0.723696
DS-50869	NOTCH1	9:139409742-139409852	249	Breast	Carcinoma, Ductal	2.3962	-0.0804314
DS-50869	NOTCH1	9:139409935-139410168	42.04	Breast	Carcinoma, Ductal	1.62366	0.607295
DS-50869	NOTCH1	9:139410433-139410546	203.86	Breast	Carcinoma, Ductal	2.30933	0.0478077
DS-50869	NOTCH1	9:139411724-139411837	49.68	Breast	Carcinoma, Ductal	1.69618	0.720005
DS-50869	NOTCH1	9:139412204-139412389	223.12	Breast	Carcinoma, Ductal	2.34854	-0.312293
DS-50869	NOTCH1	9:139412589-139412744	61.51	Breast	Carcinoma, Ductal	1.78895	0.99337
DS-50869	NOTCH1	9:139413043-139413276	163.58	Breast	Carcinoma, Ductal	2.21373	0.052524
DS-50869	NOTCH1	9:139413895-139414017	248.85	Breast	Carcinoma, Ductal	2.39594	-0.421867
DS-50869	NOTCH1	9:139417302-139417640	21.14	Breast	Carcinoma, Ductal	1.3251	1.16055
DS-50869	NOTCH1	9:139418169-139418431	44.73	Breast	Carcinoma, Ductal	1.6506	1.115
DS-50869	NOTCH1	9:139438476-139438554	26.32	Breast	Carcinoma, Ductal	1.42029	0.300675
DS-50869	NOTCH1	9:139440178-139440238	2.44	Breast	Carcinoma, Ductal	0.38739	-0.942988
DS-50869	NOTCH2	1:120457929-120459317	149.68	Breast	Carcinoma, Ductal	2.17516	-0.661153
DS-50869	NOTCH2	1:120460288-120460385	141.77	Breast	Carcinoma, Ductal	2.15158	-0.0808647
DS-50869	NOTCH2	1:120461029-120461176	200.41	Breast	Carcinoma, Ductal	2.30192	-0.024785
DS-50869	NOTCH2	1:120461935-120462236	119.01	Breast	Carcinoma, Ductal	2.07558	-0.316756
DS-50869	NOTCH2	1:120462852-120463020	169.53	Breast	Carcinoma, Ductal	2.22925	-0.446637
DS-50869	NOTCH2	1:120464336-120464432	160.86	Breast	Carcinoma, Ductal	2.20645	-0.150219
DS-50869	NOTCH2	1:120464859-120465069	203.67	Breast	Carcinoma, Ductal	2.30893	0.0548162
DS-50869	NOTCH2	1:120465259-120465401	79.57	Breast	Carcinoma, Ductal	1.90075	-0.447394
DS-50869	NOTCH2	1:120466260-120466607	98.84	Breast	Carcinoma, Ductal	1.99493	-0.728999
DS-50869	NOTCH2	1:120467928-120468433	227.45	Breast	Carcinoma, Ductal	2.35689	-0.774118
DS-50869	NOTCH2	1:120469122-120469234	44.86	Breast	Carcinoma, Ductal	1.65186	-0.676944
DS-50869	NOTCH2	1:120471599-120471835	189.79	Breast	Carcinoma, Ductal	2.27827	0.203964
DS-50869	NOTCH2	1:120478042-120478227	68.54	Breast	Carcinoma, Ductal	1.83594	-0.606105
DS-50869	NOTCH2	1:120479905-120480089	198.61	Breast	Carcinoma, Ductal	2.298	-0.464068
DS-50869	NOTCH2	1:120480480-120480633	139.76	Breast	Carcinoma, Ductal	2.14538	-0.13628
DS-50869	NOTCH2	1:120483178-120483379	83.85	Breast	Carcinoma, Ductal	1.9235	-0.214355
DS-50869	NOTCH2	1:120484149-120484377	107.37	Breast	Carcinoma, Ductal	2.03088	-0.431246
DS-50869	NOTCH2	1:120491037-120491189	245.99	Breast	Carcinoma, Ductal	2.39092	-1.32241
DS-50869	NOTCH2	1:120491630-120491749	247.62	Breast	Carcinoma, Ductal	2.39379	-0.60043
DS-50869	NOTCH2	1:120493347-120493460	301.65	Breast	Carcinoma, Ductal	2.4795	-1.37931
DS-50869	NOTCH2	1:120496166-120496311	220.08	Breast	Carcinoma, Ductal	2.34258	-0.387056
DS-50869	NOTCH2	1:120497663-120497855	229.89	Breast	Carcinoma, Ductal	2.36152	-0.584361
DS-50869	NOTCH2	1:120502015-120502125	99.05	Breast	Carcinoma, Ductal	1.99585	-0.135441
DS-50869	NOTCH2	1:120506197-120506430	60.06	Breast	Carcinoma, Ductal	1.77859	-0.547829
DS-50869	NOTCH2	1:120508076-120508189	49.79	Breast	Carcinoma, Ductal	1.69714	-0.651133
DS-50869	NOTCH2	1:120508999-120509112	305.93	Breast	Carcinoma, Ductal	2.48562	-0.465059
DS-50869	NOTCH2	1:120510056-120510244	179.94	Breast	Carcinoma, Ductal	2.25513	-0.198193
DS-50869	NOTCH2	1:120510700-120510855	145.39	Breast	Carcinoma, Ductal	2.16253	-0.272801
DS-50869	NOTCH2	1:120512134-120512367	159.8	Breast	Carcinoma, Ductal	2.20358	-0.4461
DS-50869	NOTCH2	1:120529583-120529705	141.31	Breast	Carcinoma, Ductal	2.15017	0.0321044
DS-50869	NOTCH2	1:120539620-120539955	218.49	Breast	Carcinoma, Ductal	2.33943	-0.638835
DS-50869	NOTCH2	1:120547952-120548211	324.04	Breast	Carcinoma, Ductal	2.5106	-0.198252
DS-50869	NOTCH2	1:120572529-120572610	0	Breast	Carcinoma, Ductal		1.45847
DS-50869	NOTCH2	1:120611948-120612020	56.26	Breast	Carcinoma, Ductal	1.7502	0.252673
DS-51040	NOTCH1	9:139390523-139392010	76.22	Breast	Carcinoma, Ductal	1.88207	0.21819
DS-51040	NOTCH1	9:139393351-139393448	568.48	Breast	Carcinoma, Ductal	2.75472	-0.171578
DS-51040	NOTCH1	9:139393564-139393711	98.54	Breast	Carcinoma, Ductal	1.99361	0.243324
DS-51040	NOTCH1	9:139395004-139395299	73.03	Breast	Carcinoma, Ductal	1.8635	0.530928
DS-51040	NOTCH1	9:139396200-139396365	29.04	Breast	Carcinoma, Ductal	1.463	-1.12201
DS-51040	NOTCH1	9:139396453-139396540	61.98	Breast	Carcinoma, Ductal	1.79225	-1.21332
DS-51040	NOTCH1	9:139396724-139396940	53.07	Breast	Carcinoma, Ductal	1.72485	0.014599
DS-51040	NOTCH1	9:139397634-139397782	119.97	Breast	Carcinoma, Ductal	2.07907	-0.332036
DS-51040	NOTCH1	9:139399125-139399556	37.88	Breast	Carcinoma, Ductal	1.57841	1.13163
DS-51040	NOTCH1	9:139399762-139400333	63.39	Breast	Carcinoma, Ductal	1.80202	0.724539
DS-51040	NOTCH1	9:139400979-139401091	45.17	Breast	Carcinoma, Ductal	1.65485	0.687963
DS-51040	NOTCH1	9:139401168-139401425	37.44	Breast	Carcinoma, Ductal	1.57334	0.0513051
DS-51040	NOTCH1	9:139401757-139401889	36.88	Breast	Carcinoma, Ductal	1.56679	1.49353
DS-51040	NOTCH1	9:139402407-139402591	86.99	Breast	Carcinoma, Ductal	1.93947	1.4091
DS-51040	NOTCH1	9:139402684-139402837	114.79	Breast	Carcinoma, Ductal	2.0599	1.65667
DS-51040	NOTCH1	9:139403322-139403523	12.26	Breast	Carcinoma, Ductal	1.08849	-0.00390649
DS-51040	NOTCH1	9:139404185-139404413	169.94	Breast	Carcinoma, Ductal	2.2303	0.675285
DS-51040	NOTCH1	9:139405105-139405257	107.56	Breast	Carcinoma, Ductal	2.03165	2.67685
DS-51040	NOTCH1	9:139405604-139405723	124.95	Breast	Carcinoma, Ductal	2.09674	0.211171
DS-51040	NOTCH1	9:139407473-139407586	349.65	Breast	Carcinoma, Ductal	2.54363	1.31065
DS-51040	NOTCH1	9:139407844-139407989	105.21	Breast	Carcinoma, Ductal	2.02206	-0.0185506
DS-51040	NOTCH1	9:139408962-139409154	42.45	Breast	Carcinoma, Ductal	1.62788	0.169413
DS-51040	NOTCH1	9:139409742-139409852	249.94	Breast	Carcinoma, Ductal	2.39784	0.850177
DS-51040	NOTCH1	9:139409935-139410168	29.16	Breast	Carcinoma, Ductal	1.46479	-0.84528
DS-51040	NOTCH1	9:139410433-139410546	216.78	Breast	Carcinoma, Ductal	2.33602	1.48429
DS-51040	NOTCH1	9:139411724-139411837	47.82	Breast	Carcinoma, Ductal	1.67961	1.0729
DS-51040	NOTCH1	9:139412204-139412389	249.85	Breast	Carcinoma, Ductal	2.39768	1.9282
DS-51040	NOTCH1	9:139412589-139412744	46.2	Breast	Carcinoma, Ductal	1.66464	0.0415043
DS-51040	NOTCH1	9:139413043-139413276	147.62	Breast	Carcinoma, Ductal	2.16915	0.202084
DS-51040	NOTCH1	9:139413895-139414017	228.24	Breast	Carcinoma, Ductal	2.35839	-0.183419
DS-51040	NOTCH1	9:139417302-139417640	17.65	Breast	Carcinoma, Ductal	1.24674	0.841747
DS-51040	NOTCH1	9:139418169-139418431	38.47	Breast	Carcinoma, Ductal	1.58512	0.898527
DS-51040	NOTCH1	9:139438476-139438554	15.72	Breast	Carcinoma, Ductal	1.19645	-1.0462
DS-51040	NOTCH1	9:139440178-139440238	1.64	Breast	Carcinoma, Ductal	0.214844	-1.08464
DS-51040	NOTCH2	1:120457929-120459317	149.37	Breast	Carcinoma, Ductal	2.17426	-0.150874
DS-51040	NOTCH2	1:120460288-120460385	129.73	Breast	Carcinoma, Ductal	2.11304	0.0634348
DS-51040	NOTCH2	1:120461029-120461176	163.44	Breast	Carcinoma, Ductal	2.21336	-0.401928
DS-51040	NOTCH2	1:120461935-120462236	125.49	Breast	Carcinoma, Ductal	2.09861	0.396147
DS-51040	NOTCH2	1:120462852-120463020	178.47	Breast	Carcinoma, Ductal	2.25157	0.289733
DS-51040	NOTCH2	1:120464336-120464432	157.03	Breast	Carcinoma, Ductal	2.19598	0.0887745
DS-51040	NOTCH2	1:120464859-120465069	160.17	Breast	Carcinoma, Ductal	2.20458	-0.342074
DS-51040	NOTCH2	1:120465259-120465401	81.24	Breast	Carcinoma, Ductal	1.90977	0.158333
DS-51040	NOTCH2	1:120466260-120466607	83.22	Breast	Carcinoma, Ductal	1.92023	-0.927262
DS-51040	NOTCH2	1:120467928-120468433	240.23	Breast	Carcinoma, Ductal	2.38063	0.19776
DS-51040	NOTCH2	1:120469122-120469234	51.55	Breast	Carcinoma, Ductal	1.71223	0.512218
DS-51040	NOTCH2	1:120471599-120471835	166.51	Breast	Carcinoma, Ductal	2.22144	0.247288
DS-51040	NOTCH2	1:120478042-120478227	72.4	Breast	Carcinoma, Ductal	1.85974	0.119779
DS-51040	NOTCH2	1:120479905-120480089	217.16	Breast	Carcinoma, Ductal	2.33678	0.358412
DS-51040	NOTCH2	1:120480480-120480633	135.33	Breast	Carcinoma, Ductal	2.13139	0.404797
DS-51040	NOTCH2	1:120483178-120483379	96.52	Breast	Carcinoma, Ductal	1.98462	1.30661
DS-51040	NOTCH2	1:120484149-120484377	111.75	Breast	Carcinoma, Ductal	2.04825	0.217704
DS-51040	NOTCH2	1:120491037-120491189	275.01	Breast	Carcinoma, Ductal	2.43935	0.383929
DS-51040	NOTCH2	1:120491630-120491749	229.25	Breast	Carcinoma, Ductal	2.36031	-0.387853
DS-51040	NOTCH2	1:120493347-120493460	299.78	Breast	Carcinoma, Ductal	2.4768	-0.232735
DS-51040	NOTCH2	1:120496166-120496311	215.25	Breast	Carcinoma, Ductal	2.33294	-0.166015
DS-51040	NOTCH2	1:120497663-120497855	246.84	Breast	Carcinoma, Ductal	2.39242	1.19586
DS-51040	NOTCH2	1:120502015-120502125	83.89	Breast	Carcinoma, Ductal	1.92371	-0.168267
DS-51040	NOTCH2	1:120506197-120506430	64.26	Breast	Carcinoma, Ductal	1.80794	0.357171
DS-51040	NOTCH2	1:120508076-120508189	47.28	Breast	Carcinoma, Ductal	1.67468	-0.31469
DS-51040	NOTCH2	1:120508999-120509112	298.54	Breast	Carcinoma, Ductal	2.475	-0.123008
DS-51040	NOTCH2	1:120510056-120510244	178.89	Breast	Carcinoma, Ductal	2.25259	0.476685
DS-51040	NOTCH2	1:120510700-120510855	139.71	Breast	Carcinoma, Ductal	2.14523	0.323457
DS-51040	NOTCH2	1:120512134-120512367	195.12	Breast	Carcinoma, Ductal	2.2903	0.896193
DS-51040	NOTCH2	1:120529583-120529705	134.33	Breast	Carcinoma, Ductal	2.12817	0.209783
DS-51040	NOTCH2	1:120539620-120539955	321.12	Breast	Carcinoma, Ductal	2.50667	1.62579
DS-51040	NOTCH2	1:120547952-120548211	465.12	Breast	Carcinoma, Ductal	2.66757	1.57775
DS-51040	NOTCH2	1:120572529-120572610	0.8	Breast	Carcinoma, Ductal	-0.09691	-0.93999
DS-51040	NOTCH2	1:120611948-120612020	52.49	Breast	Carcinoma, Ductal	1.72008	0.376547
DS-51138	NOTCH1	9:139390523-139392010	42.49	Breast	Carcinoma, Ductal	1.62829	-0.87339
DS-51138	NOTCH1	9:139393351-139393448	431.12	Breast	Carcinoma, Ductal	2.6346	1.04155
DS-51138	NOTCH1	9:139393564-139393711	65.82	Breast	Carcinoma, Ductal	1.81836	0.472326
DS-51138	NOTCH1	9:139395004-139395299	46.99	Breast	Carcinoma, Ductal	1.67201	0.556764
DS-51138	NOTCH1	9:139396200-139396365	21.82	Breast	Carcinoma, Ductal	1.33885	-0.297531
DS-51138	NOTCH1	9:139396453-139396540	35.51	Breast	Carcinoma, Ductal	1.55035	-1.71662
DS-51138	NOTCH1	9:139396724-139396940	21.94	Breast	Carcinoma, Ductal	1.34124	-2.16353
DS-51138	NOTCH1	9:139397634-139397782	71.26	Breast	Carcinoma, Ductal	1.85285	-0.871015
DS-51138	NOTCH1	9:139399125-139399556	16.42	Breast	Carcinoma, Ductal	1.21537	-0.93396
DS-51138	NOTCH1	9:139399762-139400333	38.84	Breast	Carcinoma, Ductal	1.58928	0.271931
DS-51138	NOTCH1	9:139400979-139401091	19.96	Breast	Carcinoma, Ductal	1.30016	-0.881467
DS-51138	NOTCH1	9:139401168-139401425	18.42	Breast	Carcinoma, Ductal	1.26529	-1.7215
DS-51138	NOTCH1	9:139401757-139401889	14.65	Breast	Carcinoma, Ductal	1.16584	-0.637687
DS-51138	NOTCH1	9:139402407-139402591	49.1	Breast	Carcinoma, Ductal	1.69108	0.539338
DS-51138	NOTCH1	9:139402684-139402837	59.65	Breast	Carcinoma, Ductal	1.77561	0.0143069
DS-51138	NOTCH1	9:139403322-139403523	8.67	Breast	Carcinoma, Ductal	0.938019	0.339956
DS-51138	NOTCH1	9:139404185-139404413	109.9	Breast	Carcinoma, Ductal	2.041	0.751753
DS-51138	NOTCH1	9:139405105-139405257	45.33	Breast	Carcinoma, Ductal	1.65639	-0.281434
DS-51138	NOTCH1	9:139405604-139405723	68.28	Breast	Carcinoma, Ductal	1.83429	-1.21625
DS-51138	NOTCH1	9:139407473-139407586	173.88	Breast	Carcinoma, Ductal	2.24025	-0.128704
DS-51138	NOTCH1	9:139407844-139407989	79.5	Breast	Carcinoma, Ductal	1.90037	0.98701
DS-51138	NOTCH1	9:139408962-139409154	29.5	Breast	Carcinoma, Ductal	1.46982	0.589151
DS-51138	NOTCH1	9:139409742-139409852	111.69	Breast	Carcinoma, Ductal	2.04801	-1.90023
DS-51138	NOTCH1	9:139409935-139410168	23.5	Breast	Carcinoma, Ductal	1.37107	0.498143
DS-51138	NOTCH1	9:139410433-139410546	104.01	Breast	Carcinoma, Ductal	2.01708	-0.830666
DS-51138	NOTCH1	9:139411724-139411837	19.61	Breast	Carcinoma, Ductal	1.29248	-0.894013
DS-51138	NOTCH1	9:139412204-139412389	140.85	Breast	Carcinoma, Ductal	2.14876	0.684832
DS-51138	NOTCH1	9:139412589-139412744	26.44	Breast	Carcinoma, Ductal	1.42226	-0.601207
DS-51138	NOTCH1	9:139413043-139413276	109.21	Breast	Carcinoma, Ductal	2.03826	1.57291
DS-51138	NOTCH1	9:139413895-139414017	146.2	Breast	Carcinoma, Ductal	2.16495	-0.188672
DS-51138	NOTCH1	9:139417302-139417640	8.94	Breast	Carcinoma, Ductal	0.951338	-0.366522
DS-51138	NOTCH1	9:139418169-139418431	22.02	Breast	Carcinoma, Ductal	1.34282	0.143661
DS-51138	NOTCH1	9:139438476-139438554	14.59	Breast	Carcinoma, Ductal	1.16406	0.209193
DS-51138	NOTCH1	9:139440178-139440238	0	Breast	Carcinoma, Ductal		0.798675
DS-51138	NOTCH2	1:120457929-120459317	129.65	Breast	Carcinoma, Ductal	2.11277	-0.313434
DS-51138	NOTCH2	1:120460288-120460385	109	Breast	Carcinoma, Ductal	2.03743	-0.152221
DS-51138	NOTCH2	1:120461029-120461176	163.39	Breast	Carcinoma, Ductal	2.21323	0.171618
DS-51138	NOTCH2	1:120461935-120462236	92.16	Breast	Carcinoma, Ductal	1.96454	-0.383683
DS-51138	NOTCH2	1:120462852-120463020	133.68	Breast	Carcinoma, Ductal	2.12607	-0.446675
DS-51138	NOTCH2	1:120464336-120464432	134.94	Breast	Carcinoma, Ductal	2.13014	-0.022523
DS-51138	NOTCH2	1:120464859-120465069	158.53	Breast	Carcinoma, Ductal	2.20011	0.00347082
DS-51138	NOTCH2	1:120465259-120465401	76.47	Breast	Carcinoma, Ductal	1.88349	0.298496
DS-51138	NOTCH2	1:120466260-120466607	67.61	Breast	Carcinoma, Ductal	1.83001	-1.60637
DS-51138	NOTCH2	1:120467928-120468433	208.08	Breast	Carcinoma, Ductal	2.31823	-0.0319782
DS-51138	NOTCH2	1:120469122-120469234	39.95	Breast	Carcinoma, Ductal	1.60152	-0.158229
DS-51138	NOTCH2	1:120471599-120471835	144.78	Breast	Carcinoma, Ductal	2.16071	0.0448987
DS-51138	NOTCH2	1:120478042-120478227	80.97	Breast	Carcinoma, Ductal	1.90832	0.901151
DS-51138	NOTCH2	1:120479905-120480089	174.89	Breast	Carcinoma, Ductal	2.24276	-0.0679138
DS-51138	NOTCH2	1:120480480-120480633	123.44	Breast	Carcinoma, Ductal	2.09146	0.433558
DS-51138	NOTCH2	1:120483178-120483379	66.7	Breast	Carcinoma, Ductal	1.82413	-0.166945
DS-51138	NOTCH2	1:120484149-120484377	96.55	Breast	Carcinoma, Ductal	1.98475	0.0426544
DS-51138	NOTCH2	1:120491037-120491189	241.81	Breast	Carcinoma, Ductal	2.38347	0.173724
DS-51138	NOTCH2	1:120491630-120491749	273.1	Breast	Carcinoma, Ductal	2.43632	0.535197
DS-51138	NOTCH2	1:120493347-120493460	230.02	Breast	Carcinoma, Ductal	2.36177	-1.66692
DS-51138	NOTCH2	1:120496166-120496311	279.55	Breast	Carcinoma, Ductal	2.44646	0.508335
DS-51138	NOTCH2	1:120497663-120497855	208.79	Breast	Carcinoma, Ductal	2.31971	0.607642
DS-51138	NOTCH2	1:120502015-120502125	85.95	Breast	Carcinoma, Ductal	1.93425	-0.0156686
DS-51138	NOTCH2	1:120506197-120506430	59.21	Breast	Carcinoma, Ductal	1.7724	0.426252
DS-51138	NOTCH2	1:120508076-120508189	46.29	Breast	Carcinoma, Ductal	1.66549	-0.0226559
DS-51138	NOTCH2	1:120508999-120509112	325.39	Breast	Carcinoma, Ductal	2.5124	0.421637
DS-51138	NOTCH2	1:120510056-120510244	150.15	Breast	Carcinoma, Ductal	2.17653	0.0867068
DS-51138	NOTCH2	1:120510700-120510855	131.68	Breast	Carcinoma, Ductal	2.11952	0.552877
DS-51138	NOTCH2	1:120512134-120512367	128.33	Breast	Carcinoma, Ductal	2.10833	-0.373948
DS-51138	NOTCH2	1:120529583-120529705	137.14	Breast	Carcinoma, Ductal	2.13716	0.44552
DS-51138	NOTCH2	1:120539620-120539955	190.4	Breast	Carcinoma, Ductal	2.27967	-0.207626
DS-51138	NOTCH2	1:120547952-120548211	285.98	Breast	Carcinoma, Ductal	2.45634	0.200747
DS-51138	NOTCH2	1:120572529-120572610	4.98	Breast	Carcinoma, Ductal	0.697229	-0.0248791
DS-51138	NOTCH2	1:120611948-120612020	23.67	Breast	Carcinoma, Ductal	1.3742	-0.85073
DS-52209	NOTCH1	9:139390523-139392010	54.88	Breast	Carcinoma, NOS	1.73941	-0.686481
DS-52209	NOTCH1	9:139393351-139393448	462.89	Breast	Carcinoma, NOS	2.66548	-0.119103
DS-52209	NOTCH1	9:139393564-139393711	74.94	Breast	Carcinoma, NOS	1.87471	-0.0960214
DS-52209	NOTCH1	9:139395004-139395299	54	Breast	Carcinoma, NOS	1.73239	-0.0775157
DS-52209	NOTCH1	9:139396200-139396365	21.67	Breast	Carcinoma, NOS	1.33586	-1.53715
DS-52209	NOTCH1	9:139396453-139396540	53.38	Breast	Carcinoma, NOS	1.72738	-0.929231
DS-52209	NOTCH1	9:139396724-139396940	35.91	Breast	Carcinoma, NOS	1.55522	-0.868644
DS-52209	NOTCH1	9:139397634-139397782	98.63	Breast	Carcinoma, NOS	1.99401	-0.212594
DS-52209	NOTCH1	9:139399125-139399556	22.6	Breast	Carcinoma, NOS	1.35411	-0.472062
DS-52209	NOTCH1	9:139399762-139400333	45.28	Breast	Carcinoma, NOS	1.65591	-0.515819
DS-52209	NOTCH1	9:139400979-139401091	21.61	Breast	Carcinoma, NOS	1.33465	-1.52507
DS-52209	NOTCH1	9:139401168-139401425	24.34	Breast	Carcinoma, NOS	1.38632	-1.4085
DS-52209	NOTCH1	9:139401757-139401889	24.89	Breast	Carcinoma, NOS	1.39602	0.689815
DS-52209	NOTCH1	9:139402407-139402591	62.79	Breast	Carcinoma, NOS	1.79789	0.634824
DS-52209	NOTCH1	9:139402684-139402837	72.5	Breast	Carcinoma, NOS	1.86034	-0.274262
DS-52209	NOTCH1	9:139403322-139403523	11.2	Breast	Carcinoma, NOS	1.04922	0.424215
DS-52209	NOTCH1	9:139404185-139404413	118.65	Breast	Carcinoma, NOS	2.07427	-0.591257
DS-52209	NOTCH1	9:139405105-139405257	62.91	Breast	Carcinoma, NOS	1.79872	0.394121
DS-52209	NOTCH1	9:139405604-139405723	82.23	Breast	Carcinoma, NOS	1.91503	-1.62832
DS-52209	NOTCH1	9:139407473-139407586	228.71	Breast	Carcinoma, NOS	2.35929	0.110116
DS-52209	NOTCH1	9:139407844-139407989	67.86	Breast	Carcinoma, NOS	1.83161	-1.39843
DS-52209	NOTCH1	9:139408962-139409154	44.14	Breast	Carcinoma, NOS	1.64483	1.47766
DS-52209	NOTCH1	9:139409742-139409852	185.32	Breast	Carcinoma, NOS	2.26792	0.191592
DS-52209	NOTCH1	9:139409935-139410168	23.89	Breast	Carcinoma, NOS	1.37822	-0.766574
DS-52209	NOTCH1	9:139410433-139410546	166.54	Breast	Carcinoma, NOS	2.22152	1.07754
DS-52209	NOTCH1	9:139411724-139411837	31.07	Breast	Carcinoma, NOS	1.49234	0.110978
DS-52209	NOTCH1	9:139412204-139412389	151.52	Breast	Carcinoma, NOS	2.18047	-0.853819
DS-52209	NOTCH1	9:139412589-139412744	31.37	Breast	Carcinoma, NOS	1.49651	-0.946974
DS-52209	NOTCH1	9:139413043-139413276	114.44	Breast	Carcinoma, NOS	2.05858	-0.198029
DS-52209	NOTCH1	9:139413895-139414017	192.18	Breast	Carcinoma, NOS	2.28371	0.121937
DS-52209	NOTCH1	9:139417302-139417640	11.02	Breast	Carcinoma, NOS	1.04218	-0.483484
DS-52209	NOTCH1	9:139418169-139418431	25.67	Breast	Carcinoma, NOS	1.40943	-0.380439
DS-52209	NOTCH1	9:139438476-139438554	19.56	Breast	Carcinoma, NOS	1.29137	0.416702
DS-52209	NOTCH1	9:139440178-139440238	0	Breast	Carcinoma, NOS		0.798675
DS-52209	NOTCH2	1:120457929-120459317	165.86	Breast	Carcinoma, NOS	2.21974	-0.253328
DS-52209	NOTCH2	1:120460288-120460385	121.44	Breast	Carcinoma, NOS	2.08436	-0.49649
DS-52209	NOTCH2	1:120461029-120461176	188.57	Breast	Carcinoma, NOS	2.27547	-0.339287
DS-52209	NOTCH2	1:120461935-120462236	118.03	Breast	Carcinoma, NOS	2.07199	-0.319601
DS-52209	NOTCH2	1:120462852-120463020	182.06	Breast	Carcinoma, NOS	2.26021	-0.143257
DS-52209	NOTCH2	1:120464336-120464432	120.92	Breast	Carcinoma, NOS	2.0825	-0.723831
DS-52209	NOTCH2	1:120464859-120465069	212.93	Breast	Carcinoma, NOS	2.32824	0.260268
DS-52209	NOTCH2	1:120465259-120465401	85.34	Breast	Carcinoma, NOS	1.93115	-0.155177
DS-52209	NOTCH2	1:120466260-120466607	95.93	Breast	Carcinoma, NOS	1.98195	-0.867137
DS-52209	NOTCH2	1:120467928-120468433	269.2	Breast	Carcinoma, NOS	2.43008	0.105194
DS-52209	NOTCH2	1:120469122-120469234	66.05	Breast	Carcinoma, NOS	1.81987	1.00458
DS-52209	NOTCH2	1:120471599-120471835	209.71	Breast	Carcinoma, NOS	2.32162	0.719145
DS-52209	NOTCH2	1:120478042-120478227	62.54	Breast	Carcinoma, NOS	1.79616	-0.919733
DS-52209	NOTCH2	1:120479905-120480089	248.84	Breast	Carcinoma, NOS	2.39592	0.372006
DS-52209	NOTCH2	1:120480480-120480633	137.56	Breast	Carcinoma, NOS	2.13849	-0.178328
DS-52209	NOTCH2	1:120483178-120483379	62.27	Breast	Carcinoma, NOS	1.79428	-1.78651
DS-52209	NOTCH2	1:120484149-120484377	126.96	Breast	Carcinoma, NOS	2.10367	0.200458
DS-52209	NOTCH2	1:120491037-120491189	348.54	Breast	Carcinoma, NOS	2.54225	1.09359
DS-52209	NOTCH2	1:120491630-120491749	206.65	Breast	Carcinoma, NOS	2.31524	-1.18724
DS-52209	NOTCH2	1:120493347-120493460	288.91	Breast	Carcinoma, NOS	2.46076	-1.68513
DS-52209	NOTCH2	1:120496166-120496311	87.21	Breast	Carcinoma, NOS	1.94057	-2.11145
DS-52209	NOTCH2	1:120497663-120497855	268.15	Breast	Carcinoma, NOS	2.42838	0.777586
DS-52209	NOTCH2	1:120502015-120502125	36.8	Breast	Carcinoma, NOS	1.56585	-1.36509
DS-52209	NOTCH2	1:120506197-120506430	69.82	Breast	Carcinoma, NOS	1.84398	0.141674
DS-52209	NOTCH2	1:120508076-120508189	51.95	Breast	Carcinoma, NOS	1.71559	-0.460447
DS-52209	NOTCH2	1:120508999-120509112	279.61	Breast	Carcinoma, NOS	2.44655	-0.709406
DS-52209	NOTCH2	1:120510056-120510244	196.23	Breast	Carcinoma, NOS	2.29277	0.275927
DS-52209	NOTCH2	1:120510700-120510855	146.26	Breast	Carcinoma, NOS	2.16513	-0.192544
DS-52209	NOTCH2	1:120512134-120512367	203.71	Breast	Carcinoma, NOS	2.30901	0.543185
DS-52209	NOTCH2	1:120529583-120529705	172.72	Breast	Carcinoma, NOS	2.23734	0.446709
DS-52209	NOTCH2	1:120539620-120539955	262.32	Breast	Carcinoma, NOS	2.41883	0.1822
DS-52209	NOTCH2	1:120547952-120548211	362.56	Breast	Carcinoma, NOS	2.55938	0.226239
DS-52209	NOTCH2	1:120572529-120572610	0	Breast	Carcinoma, NOS		1.45847
DS-52209	NOTCH2	1:120611948-120612020	59.93	Breast	Carcinoma, NOS	1.77764	0.376839
DS-52944	NOTCH1	9:139390523-139392010	58.52	Breast	Carcinoma, Spindle Cell With Metaplasia	1.7673	0.287992
DS-52944	NOTCH1	9:139393351-139393448	437.93	Breast	Carcinoma, Spindle Cell With Metaplasia	2.6414	-0.0829979
DS-52944	NOTCH1	9:139393564-139393711	84.74	Breast	Carcinoma, Spindle Cell With Metaplasia	1.92809	0.923458
DS-52944	NOTCH1	9:139395004-139395299	51.89	Breast	Carcinoma, Spindle Cell With Metaplasia	1.71508	0.0629396
DS-52944	NOTCH1	9:139396200-139396365	31.67	Breast	Carcinoma, Spindle Cell With Metaplasia	1.50065	0.745597
DS-52944	NOTCH1	9:139396453-139396540	60.85	Breast	Carcinoma, Spindle Cell With Metaplasia	1.78426	-0.0711953
DS-52944	NOTCH1	9:139396724-139396940	43.97	Breast	Carcinoma, Spindle Cell With Metaplasia	1.64316	0.437134
DS-52944	NOTCH1	9:139397634-139397782	87.99	Breast	Carcinoma, Spindle Cell With Metaplasia	1.94443	-0.592621
DS-52944	NOTCH1	9:139399125-139399556	24.71	Breast	Carcinoma, Spindle Cell With Metaplasia	1.39287	0.318332
DS-52944	NOTCH1	9:139399762-139400333	47.87	Breast	Carcinoma, Spindle Cell With Metaplasia	1.68006	0.647998
DS-52944	NOTCH1	9:139400979-139401091	38.25	Breast	Carcinoma, Spindle Cell With Metaplasia	1.58263	1.13896
DS-52944	NOTCH1	9:139401168-139401425	36.19	Breast	Carcinoma, Spindle Cell With Metaplasia	1.55859	1.65422
DS-52944	NOTCH1	9:139401757-139401889	27.47	Breast	Carcinoma, Spindle Cell With Metaplasia	1.43886	1.39826
DS-52944	NOTCH1	9:139402407-139402591	54.46	Breast	Carcinoma, Spindle Cell With Metaplasia	1.73608	0.0749059
DS-52944	NOTCH1	9:139402684-139402837	89.07	Breast	Carcinoma, Spindle Cell With Metaplasia	1.94973	1.80927
DS-52944	NOTCH1	9:139403322-139403523	12.83	Breast	Carcinoma, Spindle Cell With Metaplasia	1.10823	1.11128
DS-52944	NOTCH1	9:139404185-139404413	135.99	Breast	Carcinoma, Spindle Cell With Metaplasia	2.13351	1.11027
DS-52944	NOTCH1	9:139405105-139405257	49.75	Breast	Carcinoma, Spindle Cell With Metaplasia	1.69679	-0.83516
DS-52944	NOTCH1	9:139405604-139405723	105.14	Breast	Carcinoma, Spindle Cell With Metaplasia	2.02177	1.11072
DS-52944	NOTCH1	9:139407473-139407586	285.95	Breast	Carcinoma, Spindle Cell With Metaplasia	2.45629	1.71929
DS-52944	NOTCH1	9:139407844-139407989	107.21	Breast	Carcinoma, Spindle Cell With Metaplasia	2.03024	1.76628
DS-52944	NOTCH1	9:139408962-139409154	40.59	Breast	Carcinoma, Spindle Cell With Metaplasia	1.60842	1.35603
DS-52944	NOTCH1	9:139409742-139409852	187.72	Breast	Carcinoma, Spindle Cell With Metaplasia	2.27351	0.750421
DS-52944	NOTCH1	9:139409935-139410168	25.26	Breast	Carcinoma, Spindle Cell With Metaplasia	1.40243	-0.0846795
DS-52944	NOTCH1	9:139410433-139410546	151.38	Breast	Carcinoma, Spindle Cell With Metaplasia	2.18007	0.797773
DS-52944	NOTCH1	9:139411724-139411837	32.28	Breast	Carcinoma, Spindle Cell With Metaplasia	1.50893	0.545325
DS-52944	NOTCH1	9:139412204-139412389	190.67	Breast	Carcinoma, Spindle Cell With Metaplasia	2.28028	1.95596
DS-52944	NOTCH1	9:139412589-139412744	44.62	Breast	Carcinoma, Spindle Cell With Metaplasia	1.64953	1.39282
DS-52944	NOTCH1	9:139413043-139413276	125.77	Breast	Carcinoma, Spindle Cell With Metaplasia	2.09958	1.28264
DS-52944	NOTCH1	9:139413895-139414017	171.12	Breast	Carcinoma, Spindle Cell With Metaplasia	2.2333	-0.29459
DS-52944	NOTCH1	9:139417302-139417640	8.57	Breast	Carcinoma, Spindle Cell With Metaplasia	0.932981	-1.46357
DS-52944	NOTCH1	9:139418169-139418431	28.65	Breast	Carcinoma, Spindle Cell With Metaplasia	1.45712	0.754891
DS-52944	NOTCH1	9:139438476-139438554	22.29	Breast	Carcinoma, Spindle Cell With Metaplasia	1.34811	1.06483
DS-52944	NOTCH1	9:139440178-139440238	0.23	Breast	Carcinoma, Spindle Cell With Metaplasia	-0.638272	-1.94324
DS-52944	NOTCH2	1:120457929-120459317	160.78	Breast	Carcinoma, Spindle Cell With Metaplasia	2.20623	-0.320472
DS-52944	NOTCH2	1:120460288-120460385	132.01	Breast	Carcinoma, Spindle Cell With Metaplasia	2.12061	-0.224375
DS-52944	NOTCH2	1:120461029-120461176	212.39	Breast	Carcinoma, Spindle Cell With Metaplasia	2.32713	0.437751
DS-52944	NOTCH2	1:120461935-120462236	118.52	Breast	Carcinoma, Spindle Cell With Metaplasia	2.07379	-0.256346
DS-52944	NOTCH2	1:120462852-120463020	184.06	Breast	Carcinoma, Spindle Cell With Metaplasia	2.26496	-0.0512523
DS-52944	NOTCH2	1:120464336-120464432	192.06	Breast	Carcinoma, Spindle Cell With Metaplasia	2.28344	0.257936
DS-52944	NOTCH2	1:120464859-120465069	174.79	Breast	Carcinoma, Spindle Cell With Metaplasia	2.24252	-0.468858
DS-52944	NOTCH2	1:120465259-120465401	72.52	Breast	Carcinoma, Spindle Cell With Metaplasia	1.86046	-0.719997
DS-52944	NOTCH2	1:120466260-120466607	102.26	Breast	Carcinoma, Spindle Cell With Metaplasia	2.00971	-0.392749
DS-52944	NOTCH2	1:120467928-120468433	237.67	Breast	Carcinoma, Spindle Cell With Metaplasia	2.37597	-0.452288
DS-52944	NOTCH2	1:120469122-120469234	59.43	Breast	Carcinoma, Spindle Cell With Metaplasia	1.77401	0.609572
DS-52944	NOTCH2	1:120471599-120471835	178.73	Breast	Carcinoma, Spindle Cell With Metaplasia	2.2522	0.0139883
DS-52944	NOTCH2	1:120478042-120478227	84.16	Breast	Carcinoma, Spindle Cell With Metaplasia	1.92511	0.235737
DS-52944	NOTCH2	1:120479905-120480089	210.63	Breast	Carcinoma, Spindle Cell With Metaplasia	2.32352	-0.179718
DS-52944	NOTCH2	1:120480480-120480633	128.63	Breast	Carcinoma, Spindle Cell With Metaplasia	2.10934	-0.450418
DS-52944	NOTCH2	1:120483178-120483379	103.71	Breast	Carcinoma, Spindle Cell With Metaplasia	2.01582	1.04879
DS-52944	NOTCH2	1:120484149-120484377	128.02	Breast	Carcinoma, Spindle Cell With Metaplasia	2.10728	0.277261
DS-52944	NOTCH2	1:120491037-120491189	326.35	Breast	Carcinoma, Spindle Cell With Metaplasia	2.51368	0.735158
DS-52944	NOTCH2	1:120491630-120491749	371.82	Breast	Carcinoma, Spindle Cell With Metaplasia	2.57033	0.844808
DS-52944	NOTCH2	1:120493347-120493460	376.09	Breast	Carcinoma, Spindle Cell With Metaplasia	2.57529	0.688215
DS-52944	NOTCH2	1:120496166-120496311	289.87	Breast	Carcinoma, Spindle Cell With Metaplasia	2.4622	0.16869
DS-52944	NOTCH2	1:120497663-120497855	260.49	Breast	Carcinoma, Spindle Cell With Metaplasia	2.41579	0.642536
DS-52944	NOTCH2	1:120502015-120502125	130.77	Breast	Carcinoma, Spindle Cell With Metaplasia	2.11651	0.237831
DS-52944	NOTCH2	1:120506197-120506430	72.5	Breast	Carcinoma, Spindle Cell With Metaplasia	1.86034	0.362556
DS-52944	NOTCH2	1:120508076-120508189	72.71	Breast	Carcinoma, Spindle Cell With Metaplasia	1.86159	0.872085
DS-52944	NOTCH2	1:120508999-120509112	374.39	Breast	Carcinoma, Spindle Cell With Metaplasia	2.57332	0.19399
DS-52944	NOTCH2	1:120510056-120510244	224.22	Breast	Carcinoma, Spindle Cell With Metaplasia	2.35067	1.01263
DS-52944	NOTCH2	1:120510700-120510855	154.45	Breast	Carcinoma, Spindle Cell With Metaplasia	2.18879	0.209535
DS-52944	NOTCH2	1:120512134-120512367	177.56	Breast	Carcinoma, Spindle Cell With Metaplasia	2.24935	0.051393
DS-52944	NOTCH2	1:120529583-120529705	179.5	Breast	Carcinoma, Spindle Cell With Metaplasia	2.25406	0.549211
DS-52944	NOTCH2	1:120539620-120539955	247.75	Breast	Carcinoma, Spindle Cell With Metaplasia	2.39401	-0.00835119
DS-52944	NOTCH2	1:120547952-120548211	307.35	Breast	Carcinoma, Spindle Cell With Metaplasia	2.48763	-0.313062
DS-52944	NOTCH2	1:120572529-120572610	1.05	Breast	Carcinoma, Spindle Cell With Metaplasia	0.0211893	-0.867532
DS-52944	NOTCH2	1:120611948-120612020	70.75	Breast	Carcinoma, Spindle Cell With Metaplasia	1.84973	0.691152
DS-52982	NOTCH1	9:139390523-139392010	47.34	Breast	Carcinoma In Situ, Ductal	1.67523	-0.366767
DS-52982	NOTCH1	9:139393351-139393448	389.48	Breast	Carcinoma In Situ, Ductal	2.59049	-0.00356154
DS-52982	NOTCH1	9:139393564-139393711	81.03	Breast	Carcinoma In Situ, Ductal	1.90865	1.38772
DS-52982	NOTCH1	9:139395004-139395299	45.58	Breast	Carcinoma In Situ, Ductal	1.65877	0.0533794
DS-52982	NOTCH1	9:139396200-139396365	19.33	Breast	Carcinoma In Situ, Ductal	1.28623	-1.15094
DS-52982	NOTCH1	9:139396453-139396540	44.6	Breast	Carcinoma In Situ, Ductal	1.64933	-0.888937
DS-52982	NOTCH1	9:139396724-139396940	35.31	Breast	Carcinoma In Situ, Ductal	1.5479	-0.0152229
DS-52982	NOTCH1	9:139397634-139397782	73.3	Breast	Carcinoma In Situ, Ductal	1.8651	-0.977517
DS-52982	NOTCH1	9:139399125-139399556	25.43	Breast	Carcinoma In Situ, Ductal	1.40535	1.14719
DS-52982	NOTCH1	9:139399762-139400333	37	Breast	Carcinoma In Situ, Ductal	1.5682	-0.648753
DS-52982	NOTCH1	9:139400979-139401091	31.96	Breast	Carcinoma In Situ, Ductal	1.50461	0.922093
DS-52982	NOTCH1	9:139401168-139401425	22.38	Breast	Carcinoma In Situ, Ductal	1.34986	-0.706718
DS-52982	NOTCH1	9:139401757-139401889	14.69	Breast	Carcinoma In Situ, Ductal	1.16702	-0.818306
DS-52982	NOTCH1	9:139402407-139402591	44.66	Breast	Carcinoma In Situ, Ductal	1.64992	-0.404587
DS-52982	NOTCH1	9:139402684-139402837	55.47	Breast	Carcinoma In Situ, Ductal	1.74406	-0.892843
DS-52982	NOTCH1	9:139403322-139403523	10.84	Breast	Carcinoma In Situ, Ductal	1.03503	0.970281
DS-52982	NOTCH1	9:139404185-139404413	99.48	Breast	Carcinoma In Situ, Ductal	1.99774	-0.483465
DS-52982	NOTCH1	9:139405105-139405257	48.19	Breast	Carcinoma In Situ, Ductal	1.68296	-0.155144
DS-52982	NOTCH1	9:139405604-139405723	86.06	Breast	Carcinoma In Situ, Ductal	1.9348	0.466748
DS-52982	NOTCH1	9:139407473-139407586	241.97	Breast	Carcinoma In Situ, Ductal	2.38376	1.49959
DS-52982	NOTCH1	9:139407844-139407989	79.8	Breast	Carcinoma In Situ, Ductal	1.902	0.7455
DS-52982	NOTCH1	9:139408962-139409154	30.14	Breast	Carcinoma In Situ, Ductal	1.47914	0.475795
DS-52982	NOTCH1	9:139409742-139409852	164.77	Breast	Carcinoma In Situ, Ductal	2.21688	0.734073
DS-52982	NOTCH1	9:139409935-139410168	21.75	Breast	Carcinoma In Situ, Ductal	1.33746	-0.209982
DS-52982	NOTCH1	9:139410433-139410546	136.2	Breast	Carcinoma In Situ, Ductal	2.13418	0.978283
DS-52982	NOTCH1	9:139411724-139411837	40.21	Breast	Carcinoma In Situ, Ductal	1.60433	2.07737
DS-52982	NOTCH1	9:139412204-139412389	141.55	Breast	Carcinoma In Situ, Ductal	2.15091	0.313866
DS-52982	NOTCH1	9:139412589-139412744	35.66	Breast	Carcinoma In Situ, Ductal	1.55218	0.849225
DS-52982	NOTCH1	9:139413043-139413276	103.68	Breast	Carcinoma In Situ, Ductal	2.01569	0.66213
DS-52982	NOTCH1	9:139413895-139414017	168.69	Breast	Carcinoma In Situ, Ductal	2.22709	0.558592
DS-52982	NOTCH1	9:139417302-139417640	10.73	Breast	Carcinoma In Situ, Ductal	1.0306	0.347872
DS-52982	NOTCH1	9:139418169-139418431	22.54	Breast	Carcinoma In Situ, Ductal	1.35295	0.0107044
DS-52982	NOTCH1	9:139438476-139438554	19.76	Breast	Carcinoma In Situ, Ductal	1.29579	1.09121
DS-52982	NOTCH1	9:139440178-139440238	1.77	Breast	Carcinoma In Situ, Ductal	0.247973	-0.842098
DS-52982	NOTCH2	1:120457929-120459317	133.35	Breast	Carcinoma In Situ, Ductal	2.12499	-0.24416
DS-52982	NOTCH2	1:120460288-120460385	118.21	Breast	Carcinoma In Situ, Ductal	2.07265	0.0500654
DS-52982	NOTCH2	1:120461029-120461176	190.55	Breast	Carcinoma In Situ, Ductal	2.28001	1.02179
DS-52982	NOTCH2	1:120461935-120462236	100.38	Breast	Carcinoma In Situ, Ductal	2.00165	-0.102791
DS-52982	NOTCH2	1:120462852-120463020	149.92	Breast	Carcinoma In Situ, Ductal	2.17586	-0.0415912
DS-52982	NOTCH2	1:120464336-120464432	172.24	Breast	Carcinoma In Situ, Ductal	2.23613	0.461761
DS-52982	NOTCH2	1:120464859-120465069	173.26	Breast	Carcinoma In Situ, Ductal	2.2387	0.317492
DS-52982	NOTCH2	1:120465259-120465401	62.44	Breast	Carcinoma In Situ, Ductal	1.79546	-0.501269
DS-52982	NOTCH2	1:120466260-120466607	89.47	Breast	Carcinoma In Situ, Ductal	1.95168	0.0642443
DS-52982	NOTCH2	1:120467928-120468433	198.15	Breast	Carcinoma In Situ, Ductal	2.29699	-0.323352
DS-52982	NOTCH2	1:120469122-120469234	41.83	Breast	Carcinoma In Situ, Ductal	1.62149	-0.00236154
DS-52982	NOTCH2	1:120471599-120471835	126.38	Breast	Carcinoma In Situ, Ductal	2.10168	-0.65294
DS-52982	NOTCH2	1:120478042-120478227	94.4	Breast	Carcinoma In Situ, Ductal	1.97497	1.4382
DS-52982	NOTCH2	1:120479905-120480089	178.39	Breast	Carcinoma In Situ, Ductal	2.25137	-0.0306429
DS-52982	NOTCH2	1:120480480-120480633	139.5	Breast	Carcinoma In Situ, Ductal	2.14457	1.00078
DS-52982	NOTCH2	1:120483178-120483379	75.47	Breast	Carcinoma In Situ, Ductal	1.87777	0.451512
DS-52982	NOTCH2	1:120484149-120484377	105.69	Breast	Carcinoma In Situ, Ductal	2.02403	0.334963
DS-52982	NOTCH2	1:120491037-120491189	251.1	Breast	Carcinoma In Situ, Ductal	2.39985	0.365595
DS-52982	NOTCH2	1:120491630-120491749	270.58	Breast	Carcinoma In Situ, Ductal	2.4323	0.471903
DS-52982	NOTCH2	1:120493347-120493460	285.08	Breast	Carcinoma In Situ, Ductal	2.45497	0.0930122
DS-52982	NOTCH2	1:120496166-120496311	324.17	Breast	Carcinoma In Situ, Ductal	2.51077	0.768743
DS-52982	NOTCH2	1:120497663-120497855	216.97	Breast	Carcinoma In Situ, Ductal	2.3364	0.85229
DS-52982	NOTCH2	1:120502015-120502125	124.48	Breast	Carcinoma In Situ, Ductal	2.0951	0.436018
DS-52982	NOTCH2	1:120506197-120506430	49.74	Breast	Carcinoma In Situ, Ductal	1.69671	-0.375069
DS-52982	NOTCH2	1:120508076-120508189	51.33	Breast	Carcinoma In Situ, Ductal	1.71037	0.335768
DS-52982	NOTCH2	1:120508999-120509112	361.41	Breast	Carcinoma In Situ, Ductal	2.558	0.704793
DS-52982	NOTCH2	1:120510056-120510244	169.76	Breast	Carcinoma In Situ, Ductal	2.22984	0.657292
DS-52982	NOTCH2	1:120510700-120510855	133.33	Breast	Carcinoma In Situ, Ductal	2.12493	0.570895
DS-52982	NOTCH2	1:120512134-120512367	129.68	Breast	Carcinoma In Situ, Ductal	2.11287	-0.369856
DS-52982	NOTCH2	1:120529583-120529705	138.4	Breast	Carcinoma In Situ, Ductal	2.14114	0.444955
DS-52982	NOTCH2	1:120539620-120539955	174.62	Breast	Carcinoma In Situ, Ductal	2.24209	-0.621521
DS-52982	NOTCH2	1:120547952-120548211	260.31	Breast	Carcinoma In Situ, Ductal	2.41549	-0.165844
DS-52982	NOTCH2	1:120572529-120572610	0.63	Breast	Carcinoma In Situ, Ductal	-0.200659	-1.01155
DS-52982	NOTCH2	1:120611948-120612020	33.11	Breast	Carcinoma In Situ, Ductal	1.51996	-0.277784
DS-54162	NOTCH1	9:139390523-139392010	70.38	Breast	Carcinoma, Ductal	1.84745	-0.265249
DS-54162	NOTCH1	9:139393351-139393448	467.38	Breast	Carcinoma, Ductal	2.66967	-1.45548
DS-54162	NOTCH1	9:139393564-139393711	91.56	Breast	Carcinoma, Ductal	1.96171	-0.0658245
DS-54162	NOTCH1	9:139395004-139395299	62.49	Breast	Carcinoma, Ductal	1.79581	-0.410991
DS-54162	NOTCH1	9:139396200-139396365	23.69	Breast	Carcinoma, Ductal	1.37457	-2.08595
DS-54162	NOTCH1	9:139396453-139396540	62.86	Breast	Carcinoma, Ductal	1.79837	-1.07
DS-54162	NOTCH1	9:139396724-139396940	41.55	Breast	Carcinoma, Ductal	1.61857	-1.11197
DS-54162	NOTCH1	9:139397634-139397782	106.36	Breast	Carcinoma, Ductal	2.02678	-1.05745
DS-54162	NOTCH1	9:139399125-139399556	29.06	Breast	Carcinoma, Ductal	1.4633	-0.173543
DS-54162	NOTCH1	9:139399762-139400333	56.27	Breast	Carcinoma, Ductal	1.75028	-0.290997
DS-54162	NOTCH1	9:139400979-139401091	38.23	Breast	Carcinoma, Ductal	1.5824	0.0595737
DS-54162	NOTCH1	9:139401168-139401425	36.48	Breast	Carcinoma, Ductal	1.56205	-0.00298244
DS-54162	NOTCH1	9:139401757-139401889	26.51	Breast	Carcinoma, Ductal	1.42341	0.102702
DS-54162	NOTCH1	9:139402407-139402591	58.05	Breast	Carcinoma, Ductal	1.7638	-1.2342
DS-54162	NOTCH1	9:139402684-139402837	83.6	Breast	Carcinoma, Ductal	1.92221	-0.684437
DS-54162	NOTCH1	9:139403322-139403523	14.13	Breast	Carcinoma, Ductal	1.15014	0.555499
DS-54162	NOTCH1	9:139404185-139404413	144.52	Breast	Carcinoma, Ductal	2.15993	-0.570825
DS-54162	NOTCH1	9:139405105-139405257	72.76	Breast	Carcinoma, Ductal	1.86189	0.0455324
DS-54162	NOTCH1	9:139405604-139405723	109.68	Breast	Carcinoma, Ductal	2.04013	-0.794908
DS-54162	NOTCH1	9:139407473-139407586	276.64	Breast	Carcinoma, Ductal	2.44191	0.0839529
DS-54162	NOTCH1	9:139407844-139407989	108.24	Breast	Carcinoma, Ductal	2.03439	0.264232
DS-54162	NOTCH1	9:139408962-139409154	34.85	Breast	Carcinoma, Ductal	1.5422	-0.762719
DS-54162	NOTCH1	9:139409742-139409852	200.55	Breast	Carcinoma, Ductal	2.30222	-0.691964
DS-54162	NOTCH1	9:139409935-139410168	34.28	Breast	Carcinoma, Ductal	1.53504	0.208913
DS-54162	NOTCH1	9:139410433-139410546	181.82	Breast	Carcinoma, Ductal	2.25964	0.221686
DS-54162	NOTCH1	9:139411724-139411837	40.05	Breast	Carcinoma, Ductal	1.6026	0.370819
DS-54162	NOTCH1	9:139412204-139412389	184.48	Breast	Carcinoma, Ductal	2.26595	-0.834971
DS-54162	NOTCH1	9:139412589-139412744	41.67	Breast	Carcinoma, Ductal	1.61982	-0.442168
DS-54162	NOTCH1	9:139413043-139413276	145.47	Breast	Carcinoma, Ductal	2.16277	0.232701
DS-54162	NOTCH1	9:139413895-139414017	219.8	Breast	Carcinoma, Ductal	2.34203	-0.33171
DS-54162	NOTCH1	9:139417302-139417640	17.02	Breast	Carcinoma, Ductal	1.23096	0.746959
DS-54162	NOTCH1	9:139418169-139418431	34.93	Breast	Carcinoma, Ductal	1.5432	0.374025
DS-54162	NOTCH1	9:139438476-139438554	22.01	Breast	Carcinoma, Ductal	1.34262	0.155987
DS-54162	NOTCH1	9:139440178-139440238	0	Breast	Carcinoma, Ductal		0.798675
DS-54162	NOTCH2	1:120457929-120459317	133.71	Breast	Carcinoma, Ductal	2.12616	-0.350533
DS-54162	NOTCH2	1:120460288-120460385	145.2	Breast	Carcinoma, Ductal	2.16197	0.541706
DS-54162	NOTCH2	1:120461029-120461176	173.18	Breast	Carcinoma, Ductal	2.2385	0.273732
DS-54162	NOTCH2	1:120461935-120462236	98.37	Breast	Carcinoma, Ductal	1.99286	-0.293675
DS-54162	NOTCH2	1:120462852-120463020	145.62	Breast	Carcinoma, Ductal	2.16322	-0.274601
DS-54162	NOTCH2	1:120464336-120464432	185.51	Breast	Carcinoma, Ductal	2.26837	0.550093
DS-54162	NOTCH2	1:120464859-120465069	156.89	Breast	Carcinoma, Ductal	2.1956	-0.199181
DS-54162	NOTCH2	1:120465259-120465401	68.42	Breast	Carcinoma, Ductal	1.83518	-0.274921
DS-54162	NOTCH2	1:120466260-120466607	89.61	Breast	Carcinoma, Ductal	1.95236	-0.12003
DS-54162	NOTCH2	1:120467928-120468433	202.23	Breast	Carcinoma, Ductal	2.30585	-0.378518
DS-54162	NOTCH2	1:120469122-120469234	48.88	Breast	Carcinoma, Ductal	1.68913	0.527765
DS-54162	NOTCH2	1:120471599-120471835	153.76	Breast	Carcinoma, Ductal	2.18684	0.137671
DS-54162	NOTCH2	1:120478042-120478227	84.09	Breast	Carcinoma, Ductal	1.92474	0.889796
DS-54162	NOTCH2	1:120479905-120480089	185.84	Breast	Carcinoma, Ductal	2.26914	0.00341269
DS-54162	NOTCH2	1:120480480-120480633	133.4	Breast	Carcinoma, Ductal	2.12516	0.618192
DS-54162	NOTCH2	1:120483178-120483379	73.23	Breast	Carcinoma, Ductal	1.86469	0.117869
DS-54162	NOTCH2	1:120484149-120484377	113.02	Breast	Carcinoma, Ductal	2.05316	0.463511
DS-54162	NOTCH2	1:120491037-120491189	242.77	Breast	Carcinoma, Ductal	2.3852	-0.0766714
DS-54162	NOTCH2	1:120491630-120491749	313.09	Breast	Carcinoma, Ductal	2.49567	0.859449
DS-54162	NOTCH2	1:120493347-120493460	335.78	Breast	Carcinoma, Ductal	2.52605	1.22752
DS-54162	NOTCH2	1:120496166-120496311	285.91	Breast	Carcinoma, Ductal	2.45623	0.473856
DS-54162	NOTCH2	1:120497663-120497855	212.85	Breast	Carcinoma, Ductal	2.32807	0.425462
DS-54162	NOTCH2	1:120502015-120502125	129.44	Breast	Carcinoma, Ductal	2.11207	0.445588
DS-54162	NOTCH2	1:120506197-120506430	61.73	Breast	Carcinoma, Ductal	1.7905	0.429852
DS-54162	NOTCH2	1:120508076-120508189	45.31	Breast	Carcinoma, Ductal	1.65619	-0.260229
DS-54162	NOTCH2	1:120508999-120509112	363.33	Breast	Carcinoma, Ductal	2.5603	0.627377
DS-54162	NOTCH2	1:120510056-120510244	180.93	Breast	Carcinoma, Ductal	2.25751	0.819926
DS-54162	NOTCH2	1:120510700-120510855	129.13	Breast	Carcinoma, Ductal	2.11103	0.19281
DS-54162	NOTCH2	1:120512134-120512367	122.73	Breast	Carcinoma, Ductal	2.08895	-0.711805
DS-54162	NOTCH2	1:120529583-120529705	134.02	Breast	Carcinoma, Ductal	2.12717	0.318345
DS-54162	NOTCH2	1:120539620-120539955	194.15	Breast	Carcinoma, Ductal	2.28814	-0.299729
DS-54162	NOTCH2	1:120547952-120548211	227.44	Breast	Carcinoma, Ductal	2.35687	-0.755385
DS-54162	NOTCH2	1:120572529-120572610	0.79	Breast	Carcinoma, Ductal	-0.102373	-0.918967
DS-54162	NOTCH2	1:120611948-120612020	42.04	Breast	Carcinoma, Ductal	1.62366	0.0864342
DS-55262	NOTCH1	9:139390523-139392010	63.09	Breast	Adenocarcinoma, NOS	1.79996	0.455601
DS-55262	NOTCH1	9:139393351-139393448	502.6	Breast	Adenocarcinoma, NOS	2.70122	0.522932
DS-55262	NOTCH1	9:139393564-139393711	65.34	Breast	Adenocarcinoma, NOS	1.81518	-0.821155
DS-55262	NOTCH1	9:139395004-139395299	55.26	Breast	Adenocarcinoma, NOS	1.74241	0.125534
DS-55262	NOTCH1	9:139396200-139396365	33.69	Breast	Adenocarcinoma, NOS	1.5275	0.787518
DS-55262	NOTCH1	9:139396453-139396540	76.8	Breast	Adenocarcinoma, NOS	1.88536	0.731386
DS-55262	NOTCH1	9:139396724-139396940	52.68	Breast	Adenocarcinoma, NOS	1.72165	1.06773
DS-55262	NOTCH1	9:139397634-139397782	111.11	Breast	Adenocarcinoma, NOS	2.04575	0.677569
DS-55262	NOTCH1	9:139399125-139399556	25.94	Breast	Adenocarcinoma, NOS	1.41397	0.291007
DS-55262	NOTCH1	9:139399762-139400333	47.48	Breast	Adenocarcinoma, NOS	1.67651	0.0269353
DS-55262	NOTCH1	9:139400979-139401091	31.98	Breast	Adenocarcinoma, NOS	1.50488	0.156815
DS-55262	NOTCH1	9:139401168-139401425	28.84	Breast	Adenocarcinoma, NOS	1.46	-0.227064
DS-55262	NOTCH1	9:139401757-139401889	22.9	Breast	Adenocarcinoma, NOS	1.35984	0.348435
DS-55262	NOTCH1	9:139402407-139402591	74.15	Breast	Adenocarcinoma, NOS	1.87011	1.81746
DS-55262	NOTCH1	9:139402684-139402837	83.69	Breast	Adenocarcinoma, NOS	1.92267	0.901146
DS-55262	NOTCH1	9:139403322-139403523	5.87	Breast	Adenocarcinoma, NOS	0.768638	-1.81359
DS-55262	NOTCH1	9:139404185-139404413	150.14	Breast	Adenocarcinoma, NOS	2.1765	1.50128
DS-55262	NOTCH1	9:139405105-139405257	70.88	Breast	Adenocarcinoma, NOS	1.85052	1.28271
DS-55262	NOTCH1	9:139405604-139405723	109.08	Breast	Adenocarcinoma, NOS	2.03775	0.958969
DS-55262	NOTCH1	9:139407473-139407586	205.47	Breast	Adenocarcinoma, NOS	2.31275	-0.459586
DS-55262	NOTCH1	9:139407844-139407989	85.65	Breast	Adenocarcinoma, NOS	1.93273	0.0654422
DS-55262	NOTCH1	9:139408962-139409154	35.04	Breast	Adenocarcinoma, NOS	1.54456	0.312789
DS-55262	NOTCH1	9:139409742-139409852	207.98	Breast	Adenocarcinoma, NOS	2.31802	1.12198
DS-55262	NOTCH1	9:139409935-139410168	35.81	Breast	Adenocarcinoma, NOS	1.554	1.64799
DS-55262	NOTCH1	9:139410433-139410546	149.43	Breast	Adenocarcinoma, NOS	2.17444	0.26459
DS-55262	NOTCH1	9:139411724-139411837	44.13	Breast	Adenocarcinoma, NOS	1.64473	1.68553
DS-55262	NOTCH1	9:139412204-139412389	195.34	Breast	Adenocarcinoma, NOS	2.29079	1.66986
DS-55262	NOTCH1	9:139412589-139412744	24.69	Breast	Adenocarcinoma, NOS	1.39252	-2.26646
DS-55262	NOTCH1	9:139413043-139413276	120.72	Breast	Adenocarcinoma, NOS	2.08178	0.376732
DS-55262	NOTCH1	9:139413895-139414017	242.88	Breast	Adenocarcinoma, NOS	2.38539	1.92494
DS-55262	NOTCH1	9:139417302-139417640	12.3	Breast	Adenocarcinoma, NOS	1.08991	0.114643
DS-55262	NOTCH1	9:139418169-139418431	21.76	Breast	Adenocarcinoma, NOS	1.33766	-1.43777
DS-55262	NOTCH1	9:139438476-139438554	17.57	Breast	Adenocarcinoma, NOS	1.24477	0.0754439
DS-55262	NOTCH1	9:139440178-139440238	1.8	Breast	Adenocarcinoma, NOS	0.255273	-0.92597
DS-55262	NOTCH2	1:120457929-120459317	129.3	Breast	Adenocarcinoma, NOS	2.1116	-0.931631
DS-55262	NOTCH2	1:120460288-120460385	159.79	Breast	Adenocarcinoma, NOS	2.20355	0.463671
DS-55262	NOTCH2	1:120461029-120461176	147.41	Breast	Adenocarcinoma, NOS	2.16853	-1.40202
DS-55262	NOTCH2	1:120461935-120462236	107.62	Breast	Adenocarcinoma, NOS	2.03189	-0.417593
DS-55262	NOTCH2	1:120462852-120463020	161.88	Breast	Adenocarcinoma, NOS	2.20919	-0.342153
DS-55262	NOTCH2	1:120464336-120464432	165.4	Breast	Adenocarcinoma, NOS	2.21854	0.0585535
DS-55262	NOTCH2	1:120464859-120465069	151.51	Breast	Adenocarcinoma, NOS	2.18044	-0.82507
DS-55262	NOTCH2	1:120465259-120465401	69.44	Breast	Adenocarcinoma, NOS	1.84161	-0.684391
DS-55262	NOTCH2	1:120466260-120466607	100.15	Breast	Adenocarcinoma, NOS	2.00065	-0.195315
DS-55262	NOTCH2	1:120467928-120468433	212.95	Breast	Adenocarcinoma, NOS	2.32828	-0.736941
DS-55262	NOTCH2	1:120469122-120469234	41.95	Breast	Adenocarcinoma, NOS	1.62273	-0.650307
DS-55262	NOTCH2	1:120471599-120471835	150.19	Breast	Adenocarcinoma, NOS	2.17664	-0.567571
DS-55262	NOTCH2	1:120478042-120478227	60.81	Breast	Adenocarcinoma, NOS	1.78398	-0.778922
DS-55262	NOTCH2	1:120479905-120480089	166.89	Breast	Adenocarcinoma, NOS	2.22243	-0.825438
DS-55262	NOTCH2	1:120480480-120480633	133.83	Breast	Adenocarcinoma, NOS	2.12655	0.0142641
DS-55262	NOTCH2	1:120483178-120483379	55.37	Breast	Adenocarcinoma, NOS	1.74327	-2.06633
DS-55262	NOTCH2	1:120484149-120484377	123.1	Breast	Adenocarcinoma, NOS	2.09026	0.326522
DS-55262	NOTCH2	1:120491037-120491189	230.84	Breast	Adenocarcinoma, NOS	2.36331	-1.25624
DS-55262	NOTCH2	1:120491630-120491749	273.57	Breast	Adenocarcinoma, NOS	2.43707	-0.0149469
DS-55262	NOTCH2	1:120493347-120493460	335.05	Breast	Adenocarcinoma, NOS	2.52511	0.150341
DS-55262	NOTCH2	1:120496166-120496311	254.12	Breast	Adenocarcinoma, NOS	2.40504	0.0207301
DS-55262	NOTCH2	1:120497663-120497855	173.15	Breast	Adenocarcinoma, NOS	2.23842	-2.357
DS-55262	NOTCH2	1:120502015-120502125	143.67	Breast	Adenocarcinoma, NOS	2.15737	0.421687
DS-55262	NOTCH2	1:120506197-120506430	48.89	Breast	Adenocarcinoma, NOS	1.68922	-1.12558
DS-55262	NOTCH2	1:120508076-120508189	58.11	Breast	Adenocarcinoma, NOS	1.76425	0.218364
DS-55262	NOTCH2	1:120508999-120509112	320.27	Breast	Adenocarcinoma, NOS	2.50552	-0.112077
DS-55262	NOTCH2	1:120510056-120510244	173.22	Breast	Adenocarcinoma, NOS	2.2386	-0.0206846
DS-55262	NOTCH2	1:120510700-120510855	132.21	Breast	Adenocarcinoma, NOS	2.12126	-0.40222
DS-55262	NOTCH2	1:120512134-120512367	134.12	Breast	Adenocarcinoma, NOS	2.12749	-0.848786
DS-55262	NOTCH2	1:120529583-120529705	125.97	Breast	Adenocarcinoma, NOS	2.10027	-0.0507253
DS-55262	NOTCH2	1:120539620-120539955	180.5	Breast	Adenocarcinoma, NOS	2.25648	-1.14655
DS-55262	NOTCH2	1:120547952-120548211	231.05	Breast	Adenocarcinoma, NOS	2.36371	-1.13677
DS-55262	NOTCH2	1:120572529-120572610	0	Breast	Adenocarcinoma, NOS		1.45847
DS-55262	NOTCH2	1:120611948-120612020	57.34	Breast	Adenocarcinoma, NOS	1.75846	0.414845
DS-55314	NOTCH1	9:139390523-139392010	55.42	Breast	Carcinoma, Ductal	1.74367	1.11033
DS-55314	NOTCH1	9:139393351-139393448	401.18	Breast	Carcinoma, Ductal	2.60334	0.436282
DS-55314	NOTCH1	9:139393564-139393711	58.15	Breast	Carcinoma, Ductal	1.76455	-0.282896
DS-55314	NOTCH1	9:139395004-139395299	41.43	Breast	Carcinoma, Ductal	1.61731	-0.384157
DS-55314	NOTCH1	9:139396200-139396365	24.99	Breast	Carcinoma, Ductal	1.39777	0.344589
DS-55314	NOTCH1	9:139396453-139396540	58.83	Breast	Carcinoma, Ductal	1.7696	0.493005
DS-55314	NOTCH1	9:139396724-139396940	36.71	Breast	Carcinoma, Ductal	1.56478	0.333652
DS-55314	NOTCH1	9:139397634-139397782	84.23	Breast	Carcinoma, Ductal	1.92547	0.227666
DS-55314	NOTCH1	9:139399125-139399556	20.34	Breast	Carcinoma, Ductal	1.30835	0.133543
DS-55314	NOTCH1	9:139399762-139400333	37.48	Breast	Carcinoma, Ductal	1.5738	-0.204974
DS-55314	NOTCH1	9:139400979-139401091	31.35	Breast	Carcinoma, Ductal	1.49624	0.973119
DS-55314	NOTCH1	9:139401168-139401425	30.87	Breast	Carcinoma, Ductal	1.48954	1.6584
DS-55314	NOTCH1	9:139401757-139401889	18.65	Breast	Carcinoma, Ductal	1.27068	0.38444
DS-55314	NOTCH1	9:139402407-139402591	44.25	Breast	Carcinoma, Ductal	1.64591	-0.253201
DS-55314	NOTCH1	9:139402684-139402837	54.58	Breast	Carcinoma, Ductal	1.73703	-0.773982
DS-55314	NOTCH1	9:139403322-139403523	4.63	Breast	Carcinoma, Ductal	0.665581	-1.89732
DS-55314	NOTCH1	9:139404185-139404413	98.25	Breast	Carcinoma, Ductal	1.99233	-0.319884
DS-55314	NOTCH1	9:139405105-139405257	43.03	Breast	Carcinoma, Ductal	1.63377	-0.732812
DS-55314	NOTCH1	9:139405604-139405723	100.4	Breast	Carcinoma, Ductal	2.00173	2.1259
DS-55314	NOTCH1	9:139407473-139407586	212.42	Breast	Carcinoma, Ductal	2.3272	0.938907
DS-55314	NOTCH1	9:139407844-139407989	75.53	Breast	Carcinoma, Ductal	1.87812	0.601079
DS-55314	NOTCH1	9:139408962-139409154	30.58	Breast	Carcinoma, Ductal	1.48544	0.714065
DS-55314	NOTCH1	9:139409742-139409852	167.82	Breast	Carcinoma, Ductal	2.22484	1.11302
DS-55314	NOTCH1	9:139409935-139410168	25.37	Breast	Carcinoma, Ductal	1.40432	0.877551
DS-55314	NOTCH1	9:139410433-139410546	109.64	Breast	Carcinoma, Ductal	2.03997	-0.504607
DS-55314	NOTCH1	9:139411724-139411837	21.76	Breast	Carcinoma, Ductal	1.33766	-0.488379
DS-55314	NOTCH1	9:139412204-139412389	131.91	Breast	Carcinoma, Ductal	2.12028	-0.0652885
DS-55314	NOTCH1	9:139412589-139412744	32.45	Breast	Carcinoma, Ductal	1.51121	0.492307
DS-55314	NOTCH1	9:139413043-139413276	107.31	Breast	Carcinoma, Ductal	2.03064	1.29114
DS-55314	NOTCH1	9:139413895-139414017	167.39	Breast	Carcinoma, Ductal	2.22373	0.735502
DS-55314	NOTCH1	9:139417302-139417640	12.79	Breast	Carcinoma, Ductal	1.10687	1.40993
DS-55314	NOTCH1	9:139418169-139418431	21.84	Breast	Carcinoma, Ductal	1.33925	0.00948162
DS-55314	NOTCH1	9:139438476-139438554	15.52	Breast	Carcinoma, Ductal	1.19089	0.378371
DS-55314	NOTCH1	9:139440178-139440238	1.85	Breast	Carcinoma, Ductal	0.267172	-0.803731
DS-55314	NOTCH2	1:120457929-120459317	118.69	Breast	Carcinoma, Ductal	2.07441	-0.335829
DS-55314	NOTCH2	1:120460288-120460385	118.97	Breast	Carcinoma, Ductal	2.07544	0.326929
DS-55314	NOTCH2	1:120461029-120461176	158.27	Breast	Carcinoma, Ductal	2.1994	0.468689
DS-55314	NOTCH2	1:120461935-120462236	85.14	Breast	Carcinoma, Ductal	1.93013	-0.372426
DS-55314	NOTCH2	1:120462852-120463020	118.96	Breast	Carcinoma, Ductal	2.0754	-0.579054
DS-55314	NOTCH2	1:120464336-120464432	152.43	Breast	Carcinoma, Ductal	2.18307	0.398853
DS-55314	NOTCH2	1:120464859-120465069	132.01	Breast	Carcinoma, Ductal	2.12061	-0.39505
DS-55314	NOTCH2	1:120465259-120465401	54.31	Breast	Carcinoma, Ductal	1.73488	-0.681463
DS-55314	NOTCH2	1:120466260-120466607	86.2	Breast	Carcinoma, Ductal	1.93551	0.400392
DS-55314	NOTCH2	1:120467928-120468433	181.21	Breast	Carcinoma, Ductal	2.25818	-0.311677
DS-55314	NOTCH2	1:120469122-120469234	43.32	Breast	Carcinoma, Ductal	1.63669	0.537895
DS-55314	NOTCH2	1:120471599-120471835	119.32	Breast	Carcinoma, Ductal	2.07671	-0.488646
DS-55314	NOTCH2	1:120478042-120478227	62.49	Breast	Carcinoma, Ductal	1.79581	0.241931
DS-55314	NOTCH2	1:120479905-120480089	158.72	Breast	Carcinoma, Ductal	2.20063	-0.120814
DS-55314	NOTCH2	1:120480480-120480633	119.24	Breast	Carcinoma, Ductal	2.07642	0.673043
DS-55314	NOTCH2	1:120483178-120483379	63.88	Breast	Carcinoma, Ductal	1.80536	0.044861
DS-55314	NOTCH2	1:120484149-120484377	98.31	Breast	Carcinoma, Ductal	1.9926	0.404669
DS-55314	NOTCH2	1:120491037-120491189	204.71	Breast	Carcinoma, Ductal	2.31114	-0.398323
DS-55314	NOTCH2	1:120491630-120491749	280.72	Breast	Carcinoma, Ductal	2.44827	0.906824
DS-55314	NOTCH2	1:120493347-120493460	290.25	Breast	Carcinoma, Ductal	2.46277	1.0338
DS-55314	NOTCH2	1:120496166-120496311	272.75	Breast	Carcinoma, Ductal	2.43576	0.616605
DS-55314	NOTCH2	1:120497663-120497855	176.74	Breast	Carcinoma, Ductal	2.24733	-0.104138
DS-55314	NOTCH2	1:120502015-120502125	132.31	Breast	Carcinoma, Ductal	2.12159	0.627114
DS-55314	NOTCH2	1:120506197-120506430	46.02	Breast	Carcinoma, Ductal	1.66295	-0.314127
DS-55314	NOTCH2	1:120508076-120508189	53.96	Breast	Carcinoma, Ductal	1.73207	0.87643
DS-55314	NOTCH2	1:120508999-120509112	324.11	Breast	Carcinoma, Ductal	2.51069	0.653752
DS-55314	NOTCH2	1:120510056-120510244	148.7	Breast	Carcinoma, Ductal	2.17231	0.452111
DS-55314	NOTCH2	1:120510700-120510855	112.88	Breast	Carcinoma, Ductal	2.05262	0.125071
DS-55314	NOTCH2	1:120512134-120512367	109.59	Breast	Carcinoma, Ductal	2.03977	-0.672717
DS-55314	NOTCH2	1:120529583-120529705	144.85	Breast	Carcinoma, Ductal	2.16092	0.718263
DS-55314	NOTCH2	1:120539620-120539955	168.78	Breast	Carcinoma, Ductal	2.22732	-0.372658
DS-55314	NOTCH2	1:120547952-120548211	227.47	Breast	Carcinoma, Ductal	2.35692	-0.31871
DS-55314	NOTCH2	1:120572529-120572610	1.67	Breast	Carcinoma, Ductal	0.222716	-0.504859
DS-55314	NOTCH2	1:120611948-120612020	18.18	Breast	Carcinoma, Ductal	1.25959	-1.16972
DS-55571	NOTCH1	9:139390523-139392010	44.31	Breast	Carcinoma, Ductal	1.6465	-0.394802
DS-55571	NOTCH1	9:139393351-139393448	385.51	Breast	Carcinoma, Ductal	2.58604	0.373879
DS-55571	NOTCH1	9:139393564-139393711	61.5	Breast	Carcinoma, Ductal	1.78888	0.202032
DS-55571	NOTCH1	9:139395004-139395299	38.61	Breast	Carcinoma, Ductal	1.5867	-0.652417
DS-55571	NOTCH1	9:139396200-139396365	18.74	Breast	Carcinoma, Ductal	1.27277	-0.987153
DS-55571	NOTCH1	9:139396453-139396540	32.13	Breast	Carcinoma, Ductal	1.50691	-2.07858
DS-55571	NOTCH1	9:139396724-139396940	20.38	Breast	Carcinoma, Ductal	1.3092	-2.43409
DS-55571	NOTCH1	9:139397634-139397782	70.35	Breast	Carcinoma, Ductal	1.84726	-0.825548
DS-55571	NOTCH1	9:139399125-139399556	19.96	Breast	Carcinoma, Ductal	1.30016	0.198673
DS-55571	NOTCH1	9:139399762-139400333	39.78	Breast	Carcinoma, Ductal	1.59966	0.705064
DS-55571	NOTCH1	9:139400979-139401091	18.92	Breast	Carcinoma, Ductal	1.27692	-1.02589
DS-55571	NOTCH1	9:139401168-139401425	24.85	Breast	Carcinoma, Ductal	1.39533	0.413916
DS-55571	NOTCH1	9:139401757-139401889	16.23	Breast	Carcinoma, Ductal	1.21032	-0.095648
DS-55571	NOTCH1	9:139402407-139402591	48.51	Breast	Carcinoma, Ductal	1.68583	0.588497
DS-55571	NOTCH1	9:139402684-139402837	61.76	Breast	Carcinoma, Ductal	1.79071	0.43717
DS-55571	NOTCH1	9:139403322-139403523	11	Breast	Carcinoma, Ductal	1.04139	1.24052
DS-55571	NOTCH1	9:139404185-139404413	93.46	Breast	Carcinoma, Ductal	1.97063	-0.48229
DS-55571	NOTCH1	9:139405105-139405257	49.83	Breast	Carcinoma, Ductal	1.69749	0.522242
DS-55571	NOTCH1	9:139405604-139405723	85.41	Breast	Carcinoma, Ductal	1.93151	0.958524
DS-55571	NOTCH1	9:139407473-139407586	186.49	Breast	Carcinoma, Ductal	2.27066	0.377594
DS-55571	NOTCH1	9:139407844-139407989	68.65	Breast	Carcinoma, Ductal	1.83664	0.20798
DS-55571	NOTCH1	9:139408962-139409154	18.61	Breast	Carcinoma, Ductal	1.26975	-1.70434
DS-55571	NOTCH1	9:139409742-139409852	155.23	Breast	Carcinoma, Ductal	2.19098	0.756306
DS-55571	NOTCH1	9:139409935-139410168	29.49	Breast	Carcinoma, Ductal	1.46967	1.94372
DS-55571	NOTCH1	9:139410433-139410546	93	Breast	Carcinoma, Ductal	1.96848	-1.57075
DS-55571	NOTCH1	9:139411724-139411837	22.82	Breast	Carcinoma, Ductal	1.35832	-0.141579
DS-55571	NOTCH1	9:139412204-139412389	121.62	Breast	Carcinoma, Ductal	2.085	-0.549534
DS-55571	NOTCH1	9:139412589-139412744	24.22	Breast	Carcinoma, Ductal	1.38417	-0.989053
DS-55571	NOTCH1	9:139413043-139413276	78.77	Breast	Carcinoma, Ductal	1.89636	-1.36724
DS-55571	NOTCH1	9:139413895-139414017	151.67	Breast	Carcinoma, Ductal	2.1809	0.230684
DS-55571	NOTCH1	9:139417302-139417640	9.13	Breast	Carcinoma, Ductal	0.960471	-0.159691
DS-55571	NOTCH1	9:139418169-139418431	22.41	Breast	Carcinoma, Ductal	1.35044	0.389279
DS-55571	NOTCH1	9:139438476-139438554	8.67	Breast	Carcinoma, Ductal	0.938019	-1.49074
DS-55571	NOTCH1	9:139440178-139440238	0	Breast	Carcinoma, Ductal		0.798675
DS-55571	NOTCH2	1:120457929-120459317	129.81	Breast	Carcinoma, Ductal	2.11331	-0.388691
DS-55571	NOTCH2	1:120460288-120460385	107.26	Breast	Carcinoma, Ductal	2.03044	-0.258466
DS-55571	NOTCH2	1:120461029-120461176	178.8	Breast	Carcinoma, Ductal	2.25237	0.575482
DS-55571	NOTCH2	1:120461935-120462236	82	Breast	Carcinoma, Ductal	1.91381	-0.895027
DS-55571	NOTCH2	1:120462852-120463020	131.22	Breast	Carcinoma, Ductal	2.118	-0.601173
DS-55571	NOTCH2	1:120464336-120464432	168.63	Breast	Carcinoma, Ductal	2.22693	0.393007
DS-55571	NOTCH2	1:120464859-120465069	136.77	Breast	Carcinoma, Ductal	2.13599	-0.665542
DS-55571	NOTCH2	1:120465259-120465401	74.82	Breast	Carcinoma, Ductal	1.87402	0.134971
DS-55571	NOTCH2	1:120466260-120466607	97.59	Breast	Carcinoma, Ductal	1.98941	0.525487
DS-55571	NOTCH2	1:120467928-120468433	198.25	Breast	Carcinoma, Ductal	2.29721	-0.38142
DS-55571	NOTCH2	1:120469122-120469234	36.35	Breast	Carcinoma, Ductal	1.5605	-0.652808
DS-55571	NOTCH2	1:120471599-120471835	138.74	Breast	Carcinoma, Ductal	2.1422	-0.263194
DS-55571	NOTCH2	1:120478042-120478227	64.57	Breast	Carcinoma, Ductal	1.81003	-0.0231423
DS-55571	NOTCH2	1:120479905-120480089	150.02	Breast	Carcinoma, Ductal	2.17615	-0.695768
DS-55571	NOTCH2	1:120480480-120480633	136.63	Breast	Carcinoma, Ductal	2.13555	0.835375
DS-55571	NOTCH2	1:120483178-120483379	81.59	Breast	Carcinoma, Ductal	1.91164	0.808397
DS-55571	NOTCH2	1:120484149-120484377	119.16	Breast	Carcinoma, Ductal	2.07613	0.723994
DS-55571	NOTCH2	1:120491037-120491189	223.65	Breast	Carcinoma, Ductal	2.34957	-0.502478
DS-55571	NOTCH2	1:120491630-120491749	268.34	Breast	Carcinoma, Ductal	2.42869	0.402713
DS-55571	NOTCH2	1:120493347-120493460	312.11	Breast	Carcinoma, Ductal	2.49431	0.765998
DS-55571	NOTCH2	1:120496166-120496311	277.59	Breast	Carcinoma, Ductal	2.4434	0.454632
DS-55571	NOTCH2	1:120497663-120497855	184.46	Breast	Carcinoma, Ductal	2.2659	-0.619416
DS-55571	NOTCH2	1:120502015-120502125	139.05	Breast	Carcinoma, Ductal	2.14317	0.559354
DS-55571	NOTCH2	1:120506197-120506430	56.36	Breast	Carcinoma, Ductal	1.75097	0.117043
DS-55571	NOTCH2	1:120508076-120508189	41.87	Breast	Carcinoma, Ductal	1.6219	-0.487917
DS-55571	NOTCH2	1:120508999-120509112	313.09	Breast	Carcinoma, Ductal	2.49567	0.243574
DS-55571	NOTCH2	1:120510056-120510244	162.85	Breast	Carcinoma, Ductal	2.21179	0.386982
DS-55571	NOTCH2	1:120510700-120510855	131.13	Breast	Carcinoma, Ductal	2.1177	0.399432
DS-55571	NOTCH2	1:120512134-120512367	125.81	Breast	Carcinoma, Ductal	2.09972	-0.537558
DS-55571	NOTCH2	1:120529583-120529705	145.18	Breast	Carcinoma, Ductal	2.16191	0.516037
DS-55571	NOTCH2	1:120539620-120539955	191.71	Breast	Carcinoma, Ductal	2.28264	-0.271048
DS-55571	NOTCH2	1:120547952-120548211	218.56	Breast	Carcinoma, Ductal	2.33957	-0.828117
DS-55571	NOTCH2	1:120572529-120572610	3.33	Breast	Carcinoma, Ductal	0.522444	-0.226317
DS-55571	NOTCH2	1:120611948-120612020	43.27	Breast	Carcinoma, Ductal	1.63619	0.170978
DS-55618	NOTCH1	9:139390523-139392010	55.88	Breast	Carcinoma, Ductal	1.74726	-0.64506
DS-55618	NOTCH1	9:139393351-139393448	434.19	Breast	Carcinoma, Ductal	2.63768	-0.672969
DS-55618	NOTCH1	9:139393564-139393711	56.35	Breast	Carcinoma, Ductal	1.75089	-1.75237
DS-55618	NOTCH1	9:139395004-139395299	54	Breast	Carcinoma, Ductal	1.73239	-0.164608
DS-55618	NOTCH1	9:139396200-139396365	22.55	Breast	Carcinoma, Ductal	1.35315	-1.39678
DS-55618	NOTCH1	9:139396453-139396540	69.73	Breast	Carcinoma, Ductal	1.84342	0.211328
DS-55618	NOTCH1	9:139396724-139396940	43.88	Breast	Carcinoma, Ductal	1.64227	0.0634555
DS-55618	NOTCH1	9:139397634-139397782	87.27	Breast	Carcinoma, Ductal	1.94086	-1.16856
DS-55618	NOTCH1	9:139399125-139399556	26.88	Breast	Carcinoma, Ductal	1.42943	0.376312
DS-55618	NOTCH1	9:139399762-139400333	48.91	Breast	Carcinoma, Ductal	1.6894	0.129549
DS-55618	NOTCH1	9:139400979-139401091	24.55	Breast	Carcinoma, Ductal	1.39005	-1.04073
DS-55618	NOTCH1	9:139401168-139401425	30.85	Breast	Carcinoma, Ductal	1.48926	0.094106
DS-55618	NOTCH1	9:139401757-139401889	29.91	Breast	Carcinoma, Ductal	1.47582	1.45129
DS-55618	NOTCH1	9:139402407-139402591	58.25	Breast	Carcinoma, Ductal	1.7653	0.0344584
DS-55618	NOTCH1	9:139402684-139402837	71.4	Breast	Carcinoma, Ductal	1.8537	-0.493731
DS-55618	NOTCH1	9:139403322-139403523	10.39	Breast	Carcinoma, Ductal	1.01662	0.116816
DS-55618	NOTCH1	9:139404185-139404413	113.21	Breast	Carcinoma, Ductal	2.05388	-1.10726
DS-55618	NOTCH1	9:139405105-139405257	58.87	Breast	Carcinoma, Ductal	1.76989	-0.164102
DS-55618	NOTCH1	9:139405604-139405723	108.9	Breast	Carcinoma, Ductal	2.03703	0.7703
DS-55618	NOTCH1	9:139407473-139407586	210.62	Breast	Carcinoma, Ductal	2.3235	-0.429448
DS-55618	NOTCH1	9:139407844-139407989	94.96	Breast	Carcinoma, Ductal	1.97754	0.577308
DS-55618	NOTCH1	9:139408962-139409154	38.09	Breast	Carcinoma, Ductal	1.58081	0.645431
DS-55618	NOTCH1	9:139409742-139409852	156.8	Breast	Carcinoma, Ductal	2.19535	-1.17969
DS-55618	NOTCH1	9:139409935-139410168	21.43	Breast	Carcinoma, Ductal	1.33102	-1.47916
DS-55618	NOTCH1	9:139410433-139410546	157.22	Breast	Carcinoma, Ductal	2.19651	0.515346
DS-55618	NOTCH1	9:139411724-139411837	37.61	Breast	Carcinoma, Ductal	1.5753	0.895959
DS-55618	NOTCH1	9:139412204-139412389	139.34	Breast	Carcinoma, Ductal	2.14408	-1.78853
DS-55618	NOTCH1	9:139412589-139412744	33.58	Breast	Carcinoma, Ductal	1.52608	-0.633389
DS-55618	NOTCH1	9:139413043-139413276	118.9	Breast	Carcinoma, Ductal	2.07518	0.0455628
DS-55618	NOTCH1	9:139413895-139414017	173.4	Breast	Carcinoma, Ductal	2.23905	-0.743495
DS-55618	NOTCH1	9:139417302-139417640	9.85	Breast	Carcinoma, Ductal	0.993436	-1.12487
DS-55618	NOTCH1	9:139418169-139418431	21.59	Breast	Carcinoma, Ductal	1.33425	-1.6197
DS-55618	NOTCH1	9:139438476-139438554	18.94	Breast	Carcinoma, Ductal	1.27738	0.264174
DS-55618	NOTCH1	9:139440178-139440238	0	Breast	Carcinoma, Ductal		0.798675
DS-55618	NOTCH2	1:120457929-120459317	137.11	Breast	Carcinoma, Ductal	2.13707	-0.0480877
DS-55618	NOTCH2	1:120460288-120460385	113.42	Breast	Carcinoma, Ductal	2.05469	0.00430313
DS-55618	NOTCH2	1:120461029-120461176	167.78	Breast	Carcinoma, Ductal	2.22474	0.420358
DS-55618	NOTCH2	1:120461935-120462236	93.25	Breast	Carcinoma, Ductal	1.96965	-0.282142
DS-55618	NOTCH2	1:120462852-120463020	156.54	Breast	Carcinoma, Ductal	2.19463	0.221569
DS-55618	NOTCH2	1:120464336-120464432	137.13	Breast	Carcinoma, Ductal	2.13713	0.0431496
DS-55618	NOTCH2	1:120464859-120465069	133.72	Breast	Carcinoma, Ductal	2.1262	-0.607324
DS-55618	NOTCH2	1:120465259-120465401	74	Breast	Carcinoma, Ductal	1.86923	0.233966
DS-55618	NOTCH2	1:120466260-120466607	81.78	Breast	Carcinoma, Ductal	1.91265	-0.335163
DS-55618	NOTCH2	1:120467928-120468433	195.54	Breast	Carcinoma, Ductal	2.29124	-0.263963
DS-55618	NOTCH2	1:120469122-120469234	48.19	Breast	Carcinoma, Ductal	1.68296	0.708365
DS-55618	NOTCH2	1:120471599-120471835	140.56	Breast	Carcinoma, Ductal	2.14786	-0.0216562
DS-55618	NOTCH2	1:120478042-120478227	69.35	Breast	Carcinoma, Ductal	1.84105	0.38214
DS-55618	NOTCH2	1:120479905-120480089	159.37	Breast	Carcinoma, Ductal	2.20241	-0.345008
DS-55618	NOTCH2	1:120480480-120480633	132.12	Breast	Carcinoma, Ductal	2.12097	0.854022
DS-55618	NOTCH2	1:120483178-120483379	81.02	Breast	Carcinoma, Ductal	1.90859	0.972448
DS-55618	NOTCH2	1:120484149-120484377	99.56	Breast	Carcinoma, Ductal	1.99808	0.210124
DS-55618	NOTCH2	1:120491037-120491189	218.84	Breast	Carcinoma, Ductal	2.34013	-0.397036
DS-55618	NOTCH2	1:120491630-120491749	236.72	Breast	Carcinoma, Ductal	2.37423	0.104517
DS-55618	NOTCH2	1:120493347-120493460	280.74	Breast	Carcinoma, Ductal	2.4483	0.177135
DS-55618	NOTCH2	1:120496166-120496311	230.59	Breast	Carcinoma, Ductal	2.36284	0.176251
DS-55618	NOTCH2	1:120497663-120497855	197.21	Breast	Carcinoma, Ductal	2.29493	0.258884
DS-55618	NOTCH2	1:120502015-120502125	102.1	Breast	Carcinoma, Ductal	2.00903	0.219473
DS-55618	NOTCH2	1:120506197-120506430	54.2	Breast	Carcinoma, Ductal	1.734	0.109183
DS-55618	NOTCH2	1:120508076-120508189	39.36	Breast	Carcinoma, Ductal	1.59506	-0.581579
DS-55618	NOTCH2	1:120508999-120509112	347.09	Breast	Carcinoma, Ductal	2.54044	0.659514
DS-55618	NOTCH2	1:120510056-120510244	173.75	Breast	Carcinoma, Ductal	2.23992	0.90089
DS-55618	NOTCH2	1:120510700-120510855	139.06	Breast	Carcinoma, Ductal	2.1432	0.971593
DS-55618	NOTCH2	1:120512134-120512367	119.85	Breast	Carcinoma, Ductal	2.07864	-0.582047
DS-55618	NOTCH2	1:120529583-120529705	123.55	Breast	Carcinoma, Ductal	2.09184	0.269021
DS-55618	NOTCH2	1:120539620-120539955	193.04	Breast	Carcinoma, Ductal	2.28565	-0.0804158
DS-55618	NOTCH2	1:120547952-120548211	230.57	Breast	Carcinoma, Ductal	2.3628	-0.506546
DS-55618	NOTCH2	1:120572529-120572610	1.33	Breast	Carcinoma, Ductal	0.123852	-0.644626
DS-55618	NOTCH2	1:120611948-120612020	54.3	Breast	Carcinoma, Ductal	1.7348	0.635278
DS-55628	NOTCH1	9:139390523-139392010	90.77	Breast	Adenocarcinoma, NOS	1.95794	-0.346491
DS-55628	NOTCH1	9:139393351-139393448	731.65	Breast	Adenocarcinoma, NOS	2.8643	-0.132636
DS-55628	NOTCH1	9:139393564-139393711	114.09	Breast	Adenocarcinoma, NOS	2.05725	-0.315052
DS-55628	NOTCH1	9:139395004-139395299	83.76	Breast	Adenocarcinoma, NOS	1.92304	-0.218929
DS-55628	NOTCH1	9:139396200-139396365	44.81	Breast	Adenocarcinoma, NOS	1.65137	-0.152509
DS-55628	NOTCH1	9:139396453-139396540	80.01	Breast	Adenocarcinoma, NOS	1.90314	-1.17566
DS-55628	NOTCH1	9:139396724-139396940	61.43	Breast	Adenocarcinoma, NOS	1.78838	-0.485273
DS-55628	NOTCH1	9:139397634-139397782	140.66	Breast	Adenocarcinoma, NOS	2.14817	-0.953425
DS-55628	NOTCH1	9:139399125-139399556	41.86	Breast	Adenocarcinoma, NOS	1.6218	0.355291
DS-55628	NOTCH1	9:139399762-139400333	82.16	Breast	Adenocarcinoma, NOS	1.91466	0.849122
DS-55628	NOTCH1	9:139400979-139401091	55.43	Breast	Adenocarcinoma, NOS	1.74374	0.509702
DS-55628	NOTCH1	9:139401168-139401425	47.93	Breast	Adenocarcinoma, NOS	1.68061	0.0517288
DS-55628	NOTCH1	9:139401757-139401889	27.91	Breast	Adenocarcinoma, NOS	1.44576	-0.84753
DS-55628	NOTCH1	9:139402407-139402591	87.48	Breast	Adenocarcinoma, NOS	1.94191	-0.240824
DS-55628	NOTCH1	9:139402684-139402837	126.04	Breast	Adenocarcinoma, NOS	2.10051	0.455989
DS-55628	NOTCH1	9:139403322-139403523	16.71	Breast	Adenocarcinoma, NOS	1.22298	0.215635
DS-55628	NOTCH1	9:139404185-139404413	216.76	Breast	Adenocarcinoma, NOS	2.33598	0.644223
DS-55628	NOTCH1	9:139405105-139405257	101.96	Breast	Adenocarcinoma, NOS	2.00843	0.557689
DS-55628	NOTCH1	9:139405604-139405723	160.46	Breast	Adenocarcinoma, NOS	2.20537	0.239727
DS-55628	NOTCH1	9:139407473-139407586	309.75	Breast	Adenocarcinoma, NOS	2.49101	-0.776574
DS-55628	NOTCH1	9:139407844-139407989	120.31	Breast	Adenocarcinoma, NOS	2.0803	-0.708152
DS-55628	NOTCH1	9:139408962-139409154	42.79	Breast	Adenocarcinoma, NOS	1.63134	-1.07219
DS-55628	NOTCH1	9:139409742-139409852	293.13	Breast	Adenocarcinoma, NOS	2.46706	0.182777
DS-55628	NOTCH1	9:139409935-139410168	38.42	Breast	Adenocarcinoma, NOS	1.58456	-0.676025
DS-55628	NOTCH1	9:139410433-139410546	233.2	Breast	Adenocarcinoma, NOS	2.36773	0.094358
DS-55628	NOTCH1	9:139411724-139411837	41.15	Breast	Adenocarcinoma, NOS	1.61437	-0.675936
DS-55628	NOTCH1	9:139412204-139412389	242.03	Breast	Adenocarcinoma, NOS	2.38387	-0.770031
DS-55628	NOTCH1	9:139412589-139412744	61.42	Breast	Adenocarcinoma, NOS	1.78831	0.255873
DS-55628	NOTCH1	9:139413043-139413276	182.86	Breast	Adenocarcinoma, NOS	2.26212	-0.112139
DS-55628	NOTCH1	9:139413895-139414017	283.38	Breast	Adenocarcinoma, NOS	2.45237	-0.412131
DS-55628	NOTCH1	9:139417302-139417640	16.89	Breast	Adenocarcinoma, NOS	1.22763	-0.651161
DS-55628	NOTCH1	9:139418169-139418431	39.1	Breast	Adenocarcinoma, NOS	1.59218	-0.639751
DS-55628	NOTCH1	9:139438476-139438554	21.62	Breast	Adenocarcinoma, NOS	1.33486	-0.802845
DS-55628	NOTCH1	9:139440178-139440238	0	Breast	Adenocarcinoma, NOS		0.798675
DS-55628	NOTCH2	1:120457929-120459317	1837.47	Breast	Adenocarcinoma, NOS	3.26422	4.36706
DS-55628	NOTCH2	1:120460288-120460385	222.76	Breast	Adenocarcinoma, NOS	2.34784	-2.04986
DS-55628	NOTCH2	1:120461029-120461176	909.74	Breast	Adenocarcinoma, NOS	2.95892	2.11406
DS-55628	NOTCH2	1:120461935-120462236	1366.38	Breast	Adenocarcinoma, NOS	3.13557	4.4545
DS-55628	NOTCH2	1:120462852-120463020	1738.06	Breast	Adenocarcinoma, NOS	3.24006	4.08777
DS-55628	NOTCH2	1:120464336-120464432	235.51	Breast	Adenocarcinoma, NOS	2.37201	-1.7363
DS-55628	NOTCH2	1:120464859-120465069	1475.39	Breast	Adenocarcinoma, NOS	3.16891	3.33866
DS-55628	NOTCH2	1:120465259-120465401	819.74	Breast	Adenocarcinoma, NOS	2.91368	4.01174
DS-55628	NOTCH2	1:120466260-120466607	608.02	Breast	Adenocarcinoma, NOS	2.78392	3.38742
DS-55628	NOTCH2	1:120467928-120468433	1962.27	Breast	Adenocarcinoma, NOS	3.29276	4.24767
DS-55628	NOTCH2	1:120469122-120469234	281.83	Breast	Adenocarcinoma, NOS	2.44999	2.25705
DS-55628	NOTCH2	1:120471599-120471835	1257.7	Breast	Adenocarcinoma, NOS	3.09958	3.76379
DS-55628	NOTCH2	1:120478042-120478227	123.32	Breast	Adenocarcinoma, NOS	2.09103	-2.7027
DS-55628	NOTCH2	1:120479905-120480089	2078.9	Breast	Adenocarcinoma, NOS	3.31783	3.8375
DS-55628	NOTCH2	1:120480480-120480633	270.87	Breast	Adenocarcinoma, NOS	2.43276	-2.5882
DS-55628	NOTCH2	1:120483178-120483379	229.86	Breast	Adenocarcinoma, NOS	2.36146	-0.979759
DS-55628	NOTCH2	1:120484149-120484377	204.58	Breast	Adenocarcinoma, NOS	2.31086	-2.25313
DS-55628	NOTCH2	1:120491037-120491189	1478.63	Breast	Adenocarcinoma, NOS	3.16986	3.04809
DS-55628	NOTCH2	1:120491630-120491749	388.55	Breast	Adenocarcinoma, NOS	2.58945	-2.96679
DS-55628	NOTCH2	1:120493347-120493460	1103.01	Breast	Adenocarcinoma, NOS	3.04258	-0.119421
DS-55628	NOTCH2	1:120496166-120496311	284.92	Breast	Adenocarcinoma, NOS	2.45472	-2.06123
DS-55628	NOTCH2	1:120497663-120497855	1115.86	Breast	Adenocarcinoma, NOS	3.04761	3.0442
DS-55628	NOTCH2	1:120502015-120502125	62.35	Breast	Adenocarcinoma, NOS	1.79484	-2.15332
DS-55628	NOTCH2	1:120506197-120506430	464.78	Breast	Adenocarcinoma, NOS	2.66725	3.36288
DS-55628	NOTCH2	1:120508076-120508189	88.04	Breast	Adenocarcinoma, NOS	1.94468	-2.86334
DS-55628	NOTCH2	1:120508999-120509112	400.44	Breast	Adenocarcinoma, NOS	2.60254	-3.07396
DS-55628	NOTCH2	1:120510056-120510244	334.48	Breast	Adenocarcinoma, NOS	2.52437	-2.86529
DS-55628	NOTCH2	1:120510700-120510855	289.42	Breast	Adenocarcinoma, NOS	2.46153	-3.02172
DS-55628	NOTCH2	1:120512134-120512367	1424.72	Breast	Adenocarcinoma, NOS	3.15373	3.65754
DS-55628	NOTCH2	1:120529583-120529705	148.89	Breast	Adenocarcinoma, NOS	2.17287	-2.15308
DS-55628	NOTCH2	1:120539620-120539955	1677.76	Breast	Adenocarcinoma, NOS	3.22473	3.19544
DS-55628	NOTCH2	1:120547952-120548211	2529.17	Breast	Adenocarcinoma, NOS	3.40298	3.00832
DS-55628	NOTCH2	1:120572529-120572610	0.74	Breast	Adenocarcinoma, NOS	-0.130768	-1.58965
DS-55628	NOTCH2	1:120611948-120612020	426.88	Breast	Adenocarcinoma, NOS	2.63031	1.79284
DS-55648	NOTCH1	9:139390523-139392010	38.91	Breast	Adenocarcinoma, NOS	1.59006	-0.551925
DS-55648	NOTCH1	9:139393351-139393448	310.06	Breast	Adenocarcinoma, NOS	2.49145	-0.404914
DS-55648	NOTCH1	9:139393564-139393711	52.01	Breast	Adenocarcinoma, NOS	1.71609	-0.119053
DS-55648	NOTCH1	9:139395004-139395299	32.34	Breast	Adenocarcinoma, NOS	1.50974	-1.11212
DS-55648	NOTCH1	9:139396200-139396365	21.66	Breast	Adenocarcinoma, NOS	1.33566	0.334446
DS-55648	NOTCH1	9:139396453-139396540	45.08	Breast	Adenocarcinoma, NOS	1.65398	-0.068047
DS-55648	NOTCH1	9:139396724-139396940	28.1	Breast	Adenocarcinoma, NOS	1.44871	-0.293226
DS-55648	NOTCH1	9:139397634-139397782	70.67	Breast	Adenocarcinoma, NOS	1.84924	-0.0162354
DS-55648	NOTCH1	9:139399125-139399556	14.01	Breast	Adenocarcinoma, NOS	1.14644	-1.0902
DS-55648	NOTCH1	9:139399762-139400333	34.84	Breast	Adenocarcinoma, NOS	1.54208	0.477048
DS-55648	NOTCH1	9:139400979-139401091	33.49	Breast	Adenocarcinoma, NOS	1.52492	1.84684
DS-55648	NOTCH1	9:139401168-139401425	20.4	Breast	Adenocarcinoma, NOS	1.30963	-0.17212
DS-55648	NOTCH1	9:139401757-139401889	14.71	Breast	Adenocarcinoma, NOS	1.16761	-0.044312
DS-55648	NOTCH1	9:139402407-139402591	38.65	Breast	Adenocarcinoma, NOS	1.58715	-0.21392
DS-55648	NOTCH1	9:139402684-139402837	49.74	Breast	Adenocarcinoma, NOS	1.69671	-0.396855
DS-55648	NOTCH1	9:139403322-139403523	5.72	Breast	Adenocarcinoma, NOS	0.757396	-0.663697
DS-55648	NOTCH1	9:139404185-139404413	66.23	Breast	Adenocarcinoma, NOS	1.82105	-2.50972
DS-55648	NOTCH1	9:139405105-139405257	46.27	Breast	Adenocarcinoma, NOS	1.6653	0.774338
DS-55648	NOTCH1	9:139405604-139405723	68.07	Breast	Adenocarcinoma, NOS	1.83296	-0.0886431
DS-55648	NOTCH1	9:139407473-139407586	144.56	Breast	Adenocarcinoma, NOS	2.16005	-0.443578
DS-55648	NOTCH1	9:139407844-139407989	48.09	Breast	Adenocarcinoma, NOS	1.68205	-1.29613
DS-55648	NOTCH1	9:139408962-139409154	27.95	Breast	Adenocarcinoma, NOS	1.44638	0.979701
DS-55648	NOTCH1	9:139409742-139409852	108.92	Breast	Adenocarcinoma, NOS	2.03711	-1.10718
DS-55648	NOTCH1	9:139409935-139410168	19.57	Breast	Adenocarcinoma, NOS	1.29159	0.182048
DS-55648	NOTCH1	9:139410433-139410546	83.88	Breast	Adenocarcinoma, NOS	1.92366	-1.51762
DS-55648	NOTCH1	9:139411724-139411837	15.65	Breast	Adenocarcinoma, NOS	1.19451	-1.31863
DS-55648	NOTCH1	9:139412204-139412389	109.7	Breast	Adenocarcinoma, NOS	2.04021	-0.4846
DS-55648	NOTCH1	9:139412589-139412744	27.54	Breast	Adenocarcinoma, NOS	1.43996	0.36189
DS-55648	NOTCH1	9:139413043-139413276	88.54	Breast	Adenocarcinoma, NOS	1.94714	0.801403
DS-55648	NOTCH1	9:139413895-139414017	143.03	Breast	Adenocarcinoma, NOS	2.15543	0.614076
DS-55648	NOTCH1	9:139417302-139417640	4.58	Breast	Adenocarcinoma, NOS	0.660865	-3.13576
DS-55648	NOTCH1	9:139418169-139418431	17.6	Breast	Adenocarcinoma, NOS	1.24551	-0.489221
DS-55648	NOTCH1	9:139438476-139438554	14.42	Breast	Adenocarcinoma, NOS	1.15897	0.607456
DS-55648	NOTCH1	9:139440178-139440238	0	Breast	Adenocarcinoma, NOS		0.798675
DS-55648	NOTCH2	1:120457929-120459317	158.11	Breast	Adenocarcinoma, NOS	2.19896	-0.391987
DS-55648	NOTCH2	1:120460288-120460385	144.89	Breast	Adenocarcinoma, NOS	2.16104	0.0310856
DS-55648	NOTCH2	1:120461029-120461176	189.64	Breast	Adenocarcinoma, NOS	2.27793	-0.244678
DS-55648	NOTCH2	1:120461935-120462236	117.37	Breast	Adenocarcinoma, NOS	2.06956	-0.301872
DS-55648	NOTCH2	1:120462852-120463020	158.92	Breast	Adenocarcinoma, NOS	2.20118	-0.626519
DS-55648	NOTCH2	1:120464336-120464432	217.46	Breast	Adenocarcinoma, NOS	2.33738	0.509003
DS-55648	NOTCH2	1:120464859-120465069	184.12	Breast	Adenocarcinoma, NOS	2.2651	-0.273399
DS-55648	NOTCH2	1:120465259-120465401	82.8	Breast	Adenocarcinoma, NOS	1.91803	-0.229868
DS-55648	NOTCH2	1:120466260-120466607	101.8	Breast	Adenocarcinoma, NOS	2.00775	-0.436422
DS-55648	NOTCH2	1:120467928-120468433	233	Breast	Adenocarcinoma, NOS	2.36736	-0.564252
DS-55648	NOTCH2	1:120469122-120469234	57.24	Breast	Adenocarcinoma, NOS	1.7577	0.438528
DS-55648	NOTCH2	1:120471599-120471835	162.74	Breast	Adenocarcinoma, NOS	2.21149	-0.448308
DS-55648	NOTCH2	1:120478042-120478227	92.69	Breast	Adenocarcinoma, NOS	1.96703	0.58613
DS-55648	NOTCH2	1:120479905-120480089	192.86	Breast	Adenocarcinoma, NOS	2.28524	-0.50525
DS-55648	NOTCH2	1:120480480-120480633	164.61	Breast	Adenocarcinoma, NOS	2.21646	0.776045
DS-55648	NOTCH2	1:120483178-120483379	88.36	Breast	Adenocarcinoma, NOS	1.94626	0.166655
DS-55648	NOTCH2	1:120484149-120484377	139.13	Breast	Adenocarcinoma, NOS	2.14342	0.56825
DS-55648	NOTCH2	1:120491037-120491189	263.78	Breast	Adenocarcinoma, NOS	2.42124	-0.726974
DS-55648	NOTCH2	1:120491630-120491749	355.57	Breast	Adenocarcinoma, NOS	2.55093	0.684858
DS-55648	NOTCH2	1:120493347-120493460	394.41	Breast	Adenocarcinoma, NOS	2.59595	1.07416
DS-55648	NOTCH2	1:120496166-120496311	371.92	Breast	Adenocarcinoma, NOS	2.57045	0.631968
DS-55648	NOTCH2	1:120497663-120497855	238.94	Breast	Adenocarcinoma, NOS	2.37829	-0.107599
DS-55648	NOTCH2	1:120502015-120502125	176.14	Breast	Adenocarcinoma, NOS	2.24586	0.607328
DS-55648	NOTCH2	1:120506197-120506430	64.07	Breast	Adenocarcinoma, NOS	1.80665	-0.187819
DS-55648	NOTCH2	1:120508076-120508189	78.16	Breast	Adenocarcinoma, NOS	1.89298	1.13812
DS-55648	NOTCH2	1:120508999-120509112	434.25	Breast	Adenocarcinoma, NOS	2.63774	0.625882
DS-55648	NOTCH2	1:120510056-120510244	186.69	Breast	Adenocarcinoma, NOS	2.27112	0.0773764
DS-55648	NOTCH2	1:120510700-120510855	135.72	Breast	Adenocarcinoma, NOS	2.13264	-0.57632
DS-55648	NOTCH2	1:120512134-120512367	161.35	Breast	Adenocarcinoma, NOS	2.20777	-0.337174
DS-55648	NOTCH2	1:120529583-120529705	163.15	Breast	Adenocarcinoma, NOS	2.21259	0.353923
DS-55648	NOTCH2	1:120539620-120539955	227.67	Breast	Adenocarcinoma, NOS	2.35731	-0.384054
DS-55648	NOTCH2	1:120547952-120548211	289.54	Breast	Adenocarcinoma, NOS	2.46171	-0.533637
DS-55648	NOTCH2	1:120572529-120572610	3.78	Breast	Adenocarcinoma, NOS	0.577492	-0.260217
DS-55648	NOTCH2	1:120611948-120612020	25.23	Breast	Adenocarcinoma, NOS	1.40192	-1.12446
DS-55653	NOTCH1	9:139390523-139392010	111.67	Breast	Carcinoma, Metaplastic, NOS	2.04794	0.0531441
DS-55653	NOTCH1	9:139393351-139393448	834.14	Breast	Carcinoma, Metaplastic, NOS	2.92124	-0.313003
DS-55653	NOTCH1	9:139393564-139393711	139.05	Breast	Carcinoma, Metaplastic, NOS	2.14317	-0.0829023
DS-55653	NOTCH1	9:139395004-139395299	95.17	Breast	Carcinoma, Metaplastic, NOS	1.9785	-0.41271
DS-55653	NOTCH1	9:139396200-139396365	59.95	Breast	Carcinoma, Metaplastic, NOS	1.77779	0.54798
DS-55653	NOTCH1	9:139396453-139396540	149.19	Breast	Carcinoma, Metaplastic, NOS	2.17374	0.917634
DS-55653	NOTCH1	9:139396724-139396940	89.69	Breast	Carcinoma, Metaplastic, NOS	1.95274	0.619054
DS-55653	NOTCH1	9:139397634-139397782	201.25	Breast	Carcinoma, Metaplastic, NOS	2.30374	0.476364
DS-55653	NOTCH1	9:139399125-139399556	48.03	Breast	Carcinoma, Metaplastic, NOS	1.68151	0.257065
DS-55653	NOTCH1	9:139399762-139400333	93.5	Breast	Carcinoma, Metaplastic, NOS	1.97081	0.580323
DS-55653	NOTCH1	9:139400979-139401091	63.46	Breast	Carcinoma, Metaplastic, NOS	1.8025	0.421906
DS-55653	NOTCH1	9:139401168-139401425	61.83	Breast	Carcinoma, Metaplastic, NOS	1.7912	0.712045
DS-55653	NOTCH1	9:139401757-139401889	38.52	Breast	Carcinoma, Metaplastic, NOS	1.58569	-0.107764
DS-55653	NOTCH1	9:139402407-139402591	121.88	Breast	Carcinoma, Metaplastic, NOS	2.08593	0.959272
DS-55653	NOTCH1	9:139402684-139402837	130.81	Breast	Carcinoma, Metaplastic, NOS	2.11664	-0.474792
DS-55653	NOTCH1	9:139403322-139403523	26.49	Breast	Carcinoma, Metaplastic, NOS	1.42308	1.28194
DS-55653	NOTCH1	9:139404185-139404413	234.11	Breast	Carcinoma, Metaplastic, NOS	2.36942	-0.0395214
DS-55653	NOTCH1	9:139405105-139405257	122.19	Breast	Carcinoma, Metaplastic, NOS	2.08704	0.73333
DS-55653	NOTCH1	9:139405604-139405723	187.82	Breast	Carcinoma, Metaplastic, NOS	2.27374	0.251724
DS-55653	NOTCH1	9:139407473-139407586	509.6	Breast	Carcinoma, Metaplastic, NOS	2.70723	1.16128
DS-55653	NOTCH1	9:139407844-139407989	146.78	Breast	Carcinoma, Metaplastic, NOS	2.16667	-0.446768
DS-55653	NOTCH1	9:139408962-139409154	68.64	Breast	Carcinoma, Metaplastic, NOS	1.83658	0.57215
DS-55653	NOTCH1	9:139409742-139409852	367.78	Breast	Carcinoma, Metaplastic, NOS	2.56559	0.722307
DS-55653	NOTCH1	9:139409935-139410168	52.03	Breast	Carcinoma, Metaplastic, NOS	1.71625	0.187483
DS-55653	NOTCH1	9:139410433-139410546	317.79	Breast	Carcinoma, Metaplastic, NOS	2.50214	1.32023
DS-55653	NOTCH1	9:139411724-139411837	55.78	Breast	Carcinoma, Metaplastic, NOS	1.74648	-0.0238262
DS-55653	NOTCH1	9:139412204-139412389	320.16	Breast	Carcinoma, Metaplastic, NOS	2.50537	0.42703
DS-55653	NOTCH1	9:139412589-139412744	79.78	Breast	Carcinoma, Metaplastic, NOS	1.90189	0.853565
DS-55653	NOTCH1	9:139413043-139413276	207.8	Breast	Carcinoma, Metaplastic, NOS	2.31765	-0.382217
DS-55653	NOTCH1	9:139413895-139414017	334.57	Breast	Carcinoma, Metaplastic, NOS	2.52449	-0.337566
DS-55653	NOTCH1	9:139417302-139417640	20.03	Breast	Carcinoma, Metaplastic, NOS	1.30168	-0.577215
DS-55653	NOTCH1	9:139418169-139418431	50.14	Breast	Carcinoma, Metaplastic, NOS	1.70018	-0.0223025
DS-55653	NOTCH1	9:139438476-139438554	44.96	Breast	Carcinoma, Metaplastic, NOS	1.65283	1.15103
DS-55653	NOTCH1	9:139440178-139440238	2.51	Breast	Carcinoma, Metaplastic, NOS	0.399674	-1.07319
DS-55653	NOTCH2	1:120457929-120459317	197.63	Breast	Carcinoma, Metaplastic, NOS	2.29585	1.7869
DS-55653	NOTCH2	1:120460288-120460385	40.02	Breast	Carcinoma, Metaplastic, NOS	1.60228	-2.56853
DS-55653	NOTCH2	1:120461029-120461176	163.74	Breast	Carcinoma, Metaplastic, NOS	2.21415	1.04231
DS-55653	NOTCH2	1:120461935-120462236	147.42	Breast	Carcinoma, Metaplastic, NOS	2.16856	1.89078
DS-55653	NOTCH2	1:120462852-120463020	211.46	Breast	Carcinoma, Metaplastic, NOS	2.32523	1.87964
DS-55653	NOTCH2	1:120464336-120464432	40.35	Breast	Carcinoma, Metaplastic, NOS	1.60584	-2.21361
DS-55653	NOTCH2	1:120464859-120465069	224.12	Breast	Carcinoma, Metaplastic, NOS	2.35048	1.94852
DS-55653	NOTCH2	1:120465259-120465401	96.83	Breast	Carcinoma, Metaplastic, NOS	1.98601	1.7378
DS-55653	NOTCH2	1:120466260-120466607	102.15	Breast	Carcinoma, Metaplastic, NOS	2.00924	1.8394
DS-55653	NOTCH2	1:120467928-120468433	276.6	Breast	Carcinoma, Metaplastic, NOS	2.44185	2.11776
DS-55653	NOTCH2	1:120469122-120469234	65.73	Breast	Carcinoma, Metaplastic, NOS	1.81776	2.58607
DS-55653	NOTCH2	1:120471599-120471835	191.05	Breast	Carcinoma, Metaplastic, NOS	2.28115	2.07578
DS-55653	NOTCH2	1:120478042-120478227	32.39	Breast	Carcinoma, Metaplastic, NOS	1.51041	-1.97195
DS-55653	NOTCH2	1:120479905-120480089	294.97	Breast	Carcinoma, Metaplastic, NOS	2.46978	2.33088
DS-55653	NOTCH2	1:120480480-120480633	62.66	Breast	Carcinoma, Metaplastic, NOS	1.79699	-2.24148
DS-55653	NOTCH2	1:120483178-120483379	45.88	Breast	Carcinoma, Metaplastic, NOS	1.66162	-1.4054
DS-55653	NOTCH2	1:120484149-120484377	43.63	Breast	Carcinoma, Metaplastic, NOS	1.63979	-2.29751
DS-55653	NOTCH2	1:120491037-120491189	283.78	Breast	Carcinoma, Metaplastic, NOS	2.45298	2.24883
DS-55653	NOTCH2	1:120491630-120491749	102.8	Breast	Carcinoma, Metaplastic, NOS	2.01199	-2.27875
DS-55653	NOTCH2	1:120493347-120493460	226.73	Breast	Carcinoma, Metaplastic, NOS	2.35551	-0.540802
DS-55653	NOTCH2	1:120496166-120496311	57.48	Breast	Carcinoma, Metaplastic, NOS	1.75952	-2.18868
DS-55653	NOTCH2	1:120497663-120497855	198.54	Breast	Carcinoma, Metaplastic, NOS	2.29785	1.41203
DS-55653	NOTCH2	1:120502015-120502125	9.72	Breast	Carcinoma, Metaplastic, NOS	0.987666	-2.56085
DS-55653	NOTCH2	1:120506197-120506430	86.52	Breast	Carcinoma, Metaplastic, NOS	1.93712	2.71612
DS-55653	NOTCH2	1:120508076-120508189	19.77	Breast	Carcinoma, Metaplastic, NOS	1.29601	-2.7134
DS-55653	NOTCH2	1:120508999-120509112	80.24	Breast	Carcinoma, Metaplastic, NOS	1.90439	-3.2951
DS-55653	NOTCH2	1:120510056-120510244	74.76	Breast	Carcinoma, Metaplastic, NOS	1.87367	-2.69097
DS-55653	NOTCH2	1:120510700-120510855	90.62	Breast	Carcinoma, Metaplastic, NOS	1.95722	-0.806164
DS-55653	NOTCH2	1:120512134-120512367	211.01	Breast	Carcinoma, Metaplastic, NOS	2.3243	2.16768
DS-55653	NOTCH2	1:120529583-120529705	33.67	Breast	Carcinoma, Metaplastic, NOS	1.52724	-2.06086
DS-55653	NOTCH2	1:120539620-120539955	258.88	Breast	Carcinoma, Metaplastic, NOS	2.4131	1.74625
DS-55653	NOTCH2	1:120547952-120548211	406.02	Breast	Carcinoma, Metaplastic, NOS	2.60855	1.95852
DS-55653	NOTCH2	1:120572529-120572610	0	Breast	Carcinoma, Metaplastic, NOS		1.45847
DS-55653	NOTCH2	1:120611948-120612020	61.03	Breast	Carcinoma, Metaplastic, NOS	1.78554	1.06879
DS-55655	NOTCH1	9:139390523-139392010	81.39	Breast	Carcinoma, Ductal	1.91057	0.396154
DS-55655	NOTCH1	9:139393351-139393448	626.2	Breast	Carcinoma, Ductal	2.79671	0.216878
DS-55655	NOTCH1	9:139393564-139393711	104.07	Breast	Carcinoma, Ductal	2.01733	0.308595
DS-55655	NOTCH1	9:139395004-139395299	76.52	Breast	Carcinoma, Ductal	1.88377	0.556992
DS-55655	NOTCH1	9:139396200-139396365	44.22	Breast	Carcinoma, Ductal	1.64562	0.837761
DS-55655	NOTCH1	9:139396453-139396540	99.59	Breast	Carcinoma, Ductal	1.99822	0.72046
DS-55655	NOTCH1	9:139396724-139396940	59.96	Breast	Carcinoma, Ductal	1.77786	0.407944
DS-55655	NOTCH1	9:139397634-139397782	154.04	Breast	Carcinoma, Ductal	2.18763	1.13315
DS-55655	NOTCH1	9:139399125-139399556	40.9	Breast	Carcinoma, Ductal	1.61172	1.31033
DS-55655	NOTCH1	9:139399762-139400333	63.83	Breast	Carcinoma, Ductal	1.80502	0.364074
DS-55655	NOTCH1	9:139400979-139401091	50.32	Breast	Carcinoma, Ductal	1.70174	0.962652
DS-55655	NOTCH1	9:139401168-139401425	42.78	Breast	Carcinoma, Ductal	1.63124	0.657473
DS-55655	NOTCH1	9:139401757-139401889	34.44	Breast	Carcinoma, Ductal	1.53706	0.997754
DS-55655	NOTCH1	9:139402407-139402591	83.06	Breast	Carcinoma, Ductal	1.91939	0.799967
DS-55655	NOTCH1	9:139402684-139402837	129.58	Breast	Carcinoma, Ductal	2.11254	2.26959
DS-55655	NOTCH1	9:139403322-139403523	14.5	Breast	Carcinoma, Ductal	1.16137	0.433391
DS-55655	NOTCH1	9:139404185-139404413	190.01	Breast	Carcinoma, Ductal	2.27878	1.26973
DS-55655	NOTCH1	9:139405105-139405257	99.47	Breast	Carcinoma, Ductal	1.99769	1.82288
DS-55655	NOTCH1	9:139405604-139405723	137.99	Breast	Carcinoma, Ductal	2.13985	0.715709
DS-55655	NOTCH1	9:139407473-139407586	324.82	Breast	Carcinoma, Ductal	2.51164	0.649935
DS-55655	NOTCH1	9:139407844-139407989	101.39	Breast	Carcinoma, Ductal	2.006	-0.506587
DS-55655	NOTCH1	9:139408962-139409154	47.22	Breast	Carcinoma, Ductal	1.67413	0.500008
DS-55655	NOTCH1	9:139409742-139409852	240.14	Breast	Carcinoma, Ductal	2.38046	0.218465
DS-55655	NOTCH1	9:139409935-139410168	43.65	Breast	Carcinoma, Ductal	1.63998	1.27054
DS-55655	NOTCH1	9:139410433-139410546	217.71	Breast	Carcinoma, Ductal	2.33788	1.17596
DS-55655	NOTCH1	9:139411724-139411837	43.25	Breast	Carcinoma, Ductal	1.63599	0.441853
DS-55655	NOTCH1	9:139412204-139412389	235.45	Breast	Carcinoma, Ductal	2.3719	0.938637
DS-55655	NOTCH1	9:139412589-139412744	61.15	Breast	Carcinoma, Ductal	1.7864	1.38772
DS-55655	NOTCH1	9:139413043-139413276	161.25	Breast	Carcinoma, Ductal	2.2075	0.636717
DS-55655	NOTCH1	9:139413895-139414017	252.75	Breast	Carcinoma, Ductal	2.40269	0.259364
DS-55655	NOTCH1	9:139417302-139417640	17.39	Breast	Carcinoma, Ductal	1.2403	0.545663
DS-55655	NOTCH1	9:139418169-139418431	41.14	Breast	Carcinoma, Ductal	1.61426	1.06015
DS-55655	NOTCH1	9:139438476-139438554	26.78	Breast	Carcinoma, Ductal	1.42781	0.615311
DS-55655	NOTCH1	9:139440178-139440238	0.23	Breast	Carcinoma, Ductal	-0.638272	-2.10369
DS-55655	NOTCH2	1:120457929-120459317	153.14	Breast	Carcinoma, Ductal	2.18509	2.64787
DS-55655	NOTCH2	1:120460288-120460385	16.43	Breast	Carcinoma, Ductal	1.21564	-3.7049
DS-55655	NOTCH2	1:120461029-120461176	94.22	Breast	Carcinoma, Ductal	1.97414	0.659011
DS-55655	NOTCH2	1:120461935-120462236	117	Breast	Carcinoma, Ductal	2.06819	2.83854
DS-55655	NOTCH2	1:120462852-120463020	151.88	Breast	Carcinoma, Ductal	2.1815	2.48261
DS-55655	NOTCH2	1:120464336-120464432	21.99	Breast	Carcinoma, Ductal	1.34223	-2.46013
DS-55655	NOTCH2	1:120464859-120465069	161.73	Breast	Carcinoma, Ductal	2.20879	2.58635
DS-55655	NOTCH2	1:120465259-120465401	84.9	Breast	Carcinoma, Ductal	1.92891	3.08036
DS-55655	NOTCH2	1:120466260-120466607	81.21	Breast	Carcinoma, Ductal	1.90961	3.43255
DS-55655	NOTCH2	1:120467928-120468433	200.32	Breast	Carcinoma, Ductal	2.30172	2.94157
DS-55655	NOTCH2	1:120469122-120469234	38.96	Breast	Carcinoma, Ductal	1.59062	2.43491
DS-55655	NOTCH2	1:120471599-120471835	146.89	Breast	Carcinoma, Ductal	2.16699	3.15466
DS-55655	NOTCH2	1:120478042-120478227	12.11	Breast	Carcinoma, Ductal	1.08314	-3.8223
DS-55655	NOTCH2	1:120479905-120480089	263.71	Breast	Carcinoma, Ductal	2.42113	3.67865
DS-55655	NOTCH2	1:120480480-120480633	33.59	Breast	Carcinoma, Ductal	1.52621	-2.92451
DS-55655	NOTCH2	1:120483178-120483379	31.44	Breast	Carcinoma, Ductal	1.49748	-0.811227
DS-55655	NOTCH2	1:120484149-120484377	18.05	Breast	Carcinoma, Ductal	1.25648	-3.72273
DS-55655	NOTCH2	1:120491037-120491189	149.9	Breast	Carcinoma, Ductal	2.1758	1.22626
DS-55655	NOTCH2	1:120491630-120491749	63.23	Breast	Carcinoma, Ductal	1.80092	-2.27346
DS-55655	NOTCH2	1:120493347-120493460	119.46	Breast	Carcinoma, Ductal	2.07722	-1.85499
DS-55655	NOTCH2	1:120496166-120496311	38.12	Breast	Carcinoma, Ductal	1.58115	-2.04431
DS-55655	NOTCH2	1:120497663-120497855	138.2	Breast	Carcinoma, Ductal	2.14051	2.46889
DS-55655	NOTCH2	1:120502015-120502125	7.34	Breast	Carcinoma, Ductal	0.865696	-2.30216
DS-55655	NOTCH2	1:120506197-120506430	50.75	Breast	Carcinoma, Ductal	1.70544	2.51593
DS-55655	NOTCH2	1:120508076-120508189	13.76	Breast	Carcinoma, Ductal	1.13862	-2.23572
DS-55655	NOTCH2	1:120508999-120509112	48.03	Breast	Carcinoma, Ductal	1.68151	-3.37103
DS-55655	NOTCH2	1:120510056-120510244	29.91	Breast	Carcinoma, Ductal	1.47582	-4.84863
DS-55655	NOTCH2	1:120510700-120510855	36.38	Breast	Carcinoma, Ductal	1.56086	-3.33987
DS-55655	NOTCH2	1:120512134-120512367	183.7	Breast	Carcinoma, Ductal	2.26411	3.54708
DS-55655	NOTCH2	1:120529583-120529705	5.18	Breast	Carcinoma, Ductal	0.71433	-4.8172
DS-55655	NOTCH2	1:120539620-120539955	173.57	Breast	Carcinoma, Ductal	2.23947	2.12495
DS-55655	NOTCH2	1:120547952-120548211	281.1	Breast	Carcinoma, Ductal	2.44886	2.3832
DS-55655	NOTCH2	1:120572529-120572610	0	Breast	Carcinoma, Ductal		1.45847
DS-55655	NOTCH2	1:120611948-120612020	89.9	Breast	Carcinoma, Ductal	1.95376	2.6055
DS-55666	NOTCH1	9:139390523-139392010	89.46	Breast	Carcinoma In Situ, Ductal	1.95163	-0.274883
DS-55666	NOTCH1	9:139393351-139393448	743.37	Breast	Carcinoma In Situ, Ductal	2.87121	0.152997
DS-55666	NOTCH1	9:139393564-139393711	105.03	Breast	Carcinoma In Situ, Ductal	2.02131	-0.643384
DS-55666	NOTCH1	9:139395004-139395299	77.55	Breast	Carcinoma In Situ, Ductal	1.88958	-0.582995
DS-55666	NOTCH1	9:139396200-139396365	44.58	Breast	Carcinoma In Situ, Ductal	1.64914	-0.0562371
DS-55666	NOTCH1	9:139396453-139396540	100.92	Breast	Carcinoma In Situ, Ductal	2.00398	-0.028652
DS-55666	NOTCH1	9:139396724-139396940	81.39	Breast	Carcinoma In Situ, Ductal	1.91057	1.02971
DS-55666	NOTCH1	9:139397634-139397782	166.07	Breast	Carcinoma In Situ, Ductal	2.22029	0.389042
DS-55666	NOTCH1	9:139399125-139399556	40.65	Breast	Carcinoma In Situ, Ductal	1.60906	0.32554
DS-55666	NOTCH1	9:139399762-139400333	81.94	Breast	Carcinoma In Situ, Ductal	1.9135	1.05987
DS-55666	NOTCH1	9:139400979-139401091	78.12	Breast	Carcinoma In Situ, Ductal	1.89276	2.05736
DS-55666	NOTCH1	9:139401168-139401425	46.37	Breast	Carcinoma In Situ, Ductal	1.66624	-0.0111991
DS-55666	NOTCH1	9:139401757-139401889	31.02	Breast	Carcinoma In Situ, Ductal	1.49164	-0.271445
DS-55666	NOTCH1	9:139402407-139402591	85.25	Breast	Carcinoma In Situ, Ductal	1.93069	-0.255351
DS-55666	NOTCH1	9:139402684-139402837	128.11	Breast	Carcinoma In Situ, Ductal	2.10758	0.768883
DS-55666	NOTCH1	9:139403322-139403523	15.04	Breast	Carcinoma In Situ, Ductal	1.17725	-0.0699513
DS-55666	NOTCH1	9:139404185-139404413	221.84	Breast	Carcinoma In Situ, Ductal	2.34604	1.04932
DS-55666	NOTCH1	9:139405105-139405257	115.96	Breast	Carcinoma In Situ, Ductal	2.06431	1.63249
DS-55666	NOTCH1	9:139405604-139405723	190.24	Breast	Carcinoma In Situ, Ductal	2.2793	1.97452
DS-55666	NOTCH1	9:139407473-139407586	392.08	Breast	Carcinoma In Situ, Ductal	2.59337	0.694257
DS-55666	NOTCH1	9:139407844-139407989	143.66	Breast	Carcinoma In Situ, Ductal	2.15734	0.520841
DS-55666	NOTCH1	9:139408962-139409154	60.1	Breast	Carcinoma In Situ, Ductal	1.77887	0.815988
DS-55666	NOTCH1	9:139409742-139409852	321.05	Breast	Carcinoma In Situ, Ductal	2.50657	1.05704
DS-55666	NOTCH1	9:139409935-139410168	42.9	Breast	Carcinoma In Situ, Ductal	1.63246	0.110293
DS-55666	NOTCH1	9:139410433-139410546	232.74	Breast	Carcinoma In Situ, Ductal	2.36687	0.267956
DS-55666	NOTCH1	9:139411724-139411837	55.73	Breast	Carcinoma In Situ, Ductal	1.74609	0.763931
DS-55666	NOTCH1	9:139412204-139412389	287.61	Breast	Carcinoma In Situ, Ductal	2.4588	1.12962
DS-55666	NOTCH1	9:139412589-139412744	47.47	Breast	Carcinoma In Situ, Ductal	1.67642	-1.07024
DS-55666	NOTCH1	9:139413043-139413276	179.69	Breast	Carcinoma In Situ, Ductal	2.25452	-0.0527594
DS-55666	NOTCH1	9:139413895-139414017	293.83	Breast	Carcinoma In Situ, Ductal	2.4681	0.0364176
DS-55666	NOTCH1	9:139417302-139417640	23.24	Breast	Carcinoma In Situ, Ductal	1.36624	1.10804
DS-55666	NOTCH1	9:139418169-139418431	38.56	Breast	Carcinoma In Situ, Ductal	1.58614	-0.574469
DS-55666	NOTCH1	9:139438476-139438554	24.77	Breast	Carcinoma In Situ, Ductal	1.39393	-0.261133
DS-55666	NOTCH1	9:139440178-139440238	2.48	Breast	Carcinoma In Situ, Ductal	0.394452	-0.98801
DS-55666	NOTCH2	1:120457929-120459317	174.58	Breast	Carcinoma In Situ, Ductal	2.24199	0.571125
DS-55666	NOTCH2	1:120460288-120460385	85.15	Breast	Carcinoma In Situ, Ductal	1.93018	-1.01453
DS-55666	NOTCH2	1:120461029-120461176	151.99	Breast	Carcinoma In Situ, Ductal	2.18182	-0.599793
DS-55666	NOTCH2	1:120461935-120462236	127.16	Breast	Carcinoma In Situ, Ductal	2.10435	0.589268
DS-55666	NOTCH2	1:120462852-120463020	195.09	Breast	Carcinoma In Situ, Ductal	2.29024	0.782801
DS-55666	NOTCH2	1:120464336-120464432	66.74	Breast	Carcinoma In Situ, Ductal	1.82439	-1.59671
DS-55666	NOTCH2	1:120464859-120465069	194.82	Breast	Carcinoma In Situ, Ductal	2.28963	0.586616
DS-55666	NOTCH2	1:120465259-120465401	91.47	Breast	Carcinoma In Situ, Ductal	1.96128	0.752686
DS-55666	NOTCH2	1:120466260-120466607	104.63	Breast	Carcinoma In Situ, Ductal	2.01966	0.726454
DS-55666	NOTCH2	1:120467928-120468433	259.19	Breast	Carcinoma In Situ, Ductal	2.41362	0.772243
DS-55666	NOTCH2	1:120469122-120469234	55.96	Breast	Carcinoma In Situ, Ductal	1.74788	1.02867
DS-55666	NOTCH2	1:120471599-120471835	171.02	Breast	Carcinoma In Situ, Ductal	2.23305	0.563015
DS-55666	NOTCH2	1:120478042-120478227	54.11	Breast	Carcinoma In Situ, Ductal	1.73328	-0.82041
DS-55666	NOTCH2	1:120479905-120480089	279.54	Breast	Carcinoma In Situ, Ductal	2.44644	1.40473
DS-55666	NOTCH2	1:120480480-120480633	107.81	Breast	Carcinoma In Situ, Ductal	2.03266	-0.541461
DS-55666	NOTCH2	1:120483178-120483379	43.33	Breast	Carcinoma In Situ, Ductal	1.63679	-2.82292
DS-55666	NOTCH2	1:120484149-120484377	74.68	Breast	Carcinoma In Situ, Ductal	1.8732	-1.09562
DS-55666	NOTCH2	1:120491037-120491189	305.14	Breast	Carcinoma In Situ, Ductal	2.4845	1.35451
DS-55666	NOTCH2	1:120491630-120491749	134.88	Breast	Carcinoma In Situ, Ductal	2.12995	-2.05108
DS-55666	NOTCH2	1:120493347-120493460	232.61	Breast	Carcinoma In Situ, Ductal	2.36663	-2.07394
DS-55666	NOTCH2	1:120496166-120496311	61.79	Breast	Carcinoma In Situ, Ductal	1.79092	-2.43664
DS-55666	NOTCH2	1:120497663-120497855	212.55	Breast	Carcinoma In Situ, Ductal	2.32746	0.263459
DS-55666	NOTCH2	1:120502015-120502125	20.53	Breast	Carcinoma In Situ, Ductal	1.31239	-1.88089
DS-55666	NOTCH2	1:120506197-120506430	71.39	Breast	Carcinoma In Situ, Ductal	1.85364	0.986402
DS-55666	NOTCH2	1:120508076-120508189	34.07	Breast	Carcinoma In Situ, Ductal	1.53237	-1.41619
DS-55666	NOTCH2	1:120508999-120509112	201.61	Breast	Carcinoma In Situ, Ductal	2.30451	-1.17058
DS-55666	NOTCH2	1:120510056-120510244	165.06	Breast	Carcinoma In Situ, Ductal	2.21764	0.268105
DS-55666	NOTCH2	1:120510700-120510855	131.1	Breast	Carcinoma In Situ, Ductal	2.1176	0.177
DS-55666	NOTCH2	1:120512134-120512367	194.53	Breast	Carcinoma In Situ, Ductal	2.28899	1.03853
DS-55666	NOTCH2	1:120529583-120529705	91.59	Breast	Carcinoma In Situ, Ductal	1.96185	-0.475084
DS-55666	NOTCH2	1:120539620-120539955	259.63	Breast	Carcinoma In Situ, Ductal	2.41435	0.877243
DS-55666	NOTCH2	1:120547952-120548211	350.08	Breast	Carcinoma In Situ, Ductal	2.54417	0.709448
DS-55666	NOTCH2	1:120572529-120572610	0	Breast	Carcinoma In Situ, Ductal		1.45847
DS-55666	NOTCH2	1:120611948-120612020	97.89	Breast	Carcinoma In Situ, Ductal	1.99074	1.53976
DS-56652	NOTCH1	9:139390523-139392010	54.68	Breast	Carcinoma, Ductal	1.73783	0.0745667
DS-56652	NOTCH1	9:139393351-139393448	430.91	Breast	Carcinoma, Ductal	2.63439	0.0931158
DS-56652	NOTCH1	9:139393564-139393711	72.82	Breast	Carcinoma, Ductal	1.86225	0.306059
DS-56652	NOTCH1	9:139395004-139395299	45.36	Breast	Carcinoma, Ductal	1.65667	-0.578197
DS-56652	NOTCH1	9:139396200-139396365	21.9	Breast	Carcinoma, Ductal	1.34044	-0.958194
DS-56652	NOTCH1	9:139396453-139396540	36.09	Breast	Carcinoma, Ductal	1.55739	-2.23108
DS-56652	NOTCH1	9:139396724-139396940	26.06	Breast	Carcinoma, Ductal	1.41597	-1.9593
DS-56652	NOTCH1	9:139397634-139397782	84.36	Breast	Carcinoma, Ductal	1.92614	-0.60366
DS-56652	NOTCH1	9:139399125-139399556	30.93	Breast	Carcinoma, Ductal	1.49038	1.71802
DS-56652	NOTCH1	9:139399762-139400333	44.73	Breast	Carcinoma, Ductal	1.6506	0.374485
DS-56652	NOTCH1	9:139400979-139401091	19.96	Breast	Carcinoma, Ductal	1.30016	-1.43403
DS-56652	NOTCH1	9:139401168-139401425	23.77	Breast	Carcinoma, Ductal	1.37603	-0.890514
DS-56652	NOTCH1	9:139401757-139401889	18.15	Breast	Carcinoma, Ductal	1.25888	-0.266842
DS-56652	NOTCH1	9:139402407-139402591	59.04	Breast	Carcinoma, Ductal	1.77115	0.904362
DS-56652	NOTCH1	9:139402684-139402837	58.88	Breast	Carcinoma, Ductal	1.76997	-1.11216
DS-56652	NOTCH1	9:139403322-139403523	7.92	Breast	Carcinoma, Ductal	0.898725	-0.435093
DS-56652	NOTCH1	9:139404185-139404413	119.69	Breast	Carcinoma, Ductal	2.07806	0.35729
DS-56652	NOTCH1	9:139405105-139405257	50.65	Breast	Carcinoma, Ductal	1.70458	-0.422497
DS-56652	NOTCH1	9:139405604-139405723	92.13	Breast	Carcinoma, Ductal	1.9644	0.292039
DS-56652	NOTCH1	9:139407473-139407586	186.22	Breast	Carcinoma, Ductal	2.27003	-0.482543
DS-56652	NOTCH1	9:139407844-139407989	101.05	Breast	Carcinoma, Ductal	2.00454	1.65257
DS-56652	NOTCH1	9:139408962-139409154	41.66	Breast	Carcinoma, Ductal	1.61972	1.70201
DS-56652	NOTCH1	9:139409742-139409852	134.08	Breast	Carcinoma, Ductal	2.12736	-1.50576
DS-56652	NOTCH1	9:139409935-139410168	20.68	Breast	Carcinoma, Ductal	1.31555	-1.02061
DS-56652	NOTCH1	9:139410433-139410546	119.67	Breast	Carcinoma, Ductal	2.07799	-0.756472
DS-56652	NOTCH1	9:139411724-139411837	38.12	Breast	Carcinoma, Ductal	1.58115	1.45621
DS-56652	NOTCH1	9:139412204-139412389	129.7	Breast	Carcinoma, Ductal	2.11294	-1.38129
DS-56652	NOTCH1	9:139412589-139412744	28.15	Breast	Carcinoma, Ductal	1.44948	-0.988359
DS-56652	NOTCH1	9:139413043-139413276	136.93	Breast	Carcinoma, Ductal	2.1365	2.48357
DS-56652	NOTCH1	9:139413895-139414017	145.43	Breast	Carcinoma, Ductal	2.16265	-1.20877
DS-56652	NOTCH1	9:139417302-139417640	9.77	Breast	Carcinoma, Ductal	0.989895	-0.582983
DS-56652	NOTCH1	9:139418169-139418431	25.29	Breast	Carcinoma, Ductal	1.40295	0.19361
DS-56652	NOTCH1	9:139438476-139438554	12.96	Breast	Carcinoma, Ductal	1.11261	-0.636846
DS-56652	NOTCH1	9:139440178-139440238	0	Breast	Carcinoma, Ductal		0.798675
DS-56652	NOTCH2	1:120457929-120459317	119.73	Breast	Carcinoma, Ductal	2.0782	-0.397741
DS-56652	NOTCH2	1:120460288-120460385	90.85	Breast	Carcinoma, Ductal	1.95832	-0.505825
DS-56652	NOTCH2	1:120461029-120461176	141.82	Breast	Carcinoma, Ductal	2.15174	-0.327555
DS-56652	NOTCH2	1:120461935-120462236	89.85	Breast	Carcinoma, Ductal	1.95352	-0.267473
DS-56652	NOTCH2	1:120462852-120463020	114.57	Breast	Carcinoma, Ductal	2.05907	-0.821768
DS-56652	NOTCH2	1:120464336-120464432	109.43	Breast	Carcinoma, Ductal	2.03914	-0.337734
DS-56652	NOTCH2	1:120464859-120465069	146.27	Breast	Carcinoma, Ductal	2.16516	-0.0900779
DS-56652	NOTCH2	1:120465259-120465401	56.21	Breast	Carcinoma, Ductal	1.74981	-0.647752
DS-56652	NOTCH2	1:120466260-120466607	61.75	Breast	Carcinoma, Ductal	1.79064	-1.81515
DS-56652	NOTCH2	1:120467928-120468433	159.14	Breast	Carcinoma, Ductal	2.20178	-1.08756
DS-56652	NOTCH2	1:120469122-120469234	23.28	Breast	Carcinoma, Ductal	1.36698	-2.21855
DS-56652	NOTCH2	1:120471599-120471835	137.14	Breast	Carcinoma, Ductal	2.13716	0.0574627
DS-56652	NOTCH2	1:120478042-120478227	70.19	Breast	Carcinoma, Ductal	1.84628	0.580324
DS-56652	NOTCH2	1:120479905-120480089	167.72	Breast	Carcinoma, Ductal	2.22458	-0.0141937
DS-56652	NOTCH2	1:120480480-120480633	107.33	Breast	Carcinoma, Ductal	2.03072	0.0163947
DS-56652	NOTCH2	1:120483178-120483379	63.64	Breast	Carcinoma, Ductal	1.80373	-0.113462
DS-56652	NOTCH2	1:120484149-120484377	97.61	Breast	Carcinoma, Ductal	1.98949	0.287084
DS-56652	NOTCH2	1:120491037-120491189	217.66	Breast	Carcinoma, Ductal	2.33778	-0.154698
DS-56652	NOTCH2	1:120491630-120491749	241.58	Breast	Carcinoma, Ductal	2.38306	0.312456
DS-56652	NOTCH2	1:120493347-120493460	231.05	Breast	Carcinoma, Ductal	2.36371	-1.14112
DS-56652	NOTCH2	1:120496166-120496311	228.16	Breast	Carcinoma, Ductal	2.35824	0.233566
DS-56652	NOTCH2	1:120497663-120497855	163.08	Breast	Carcinoma, Ductal	2.2124	-0.997378
DS-56652	NOTCH2	1:120502015-120502125	77.68	Breast	Carcinoma, Ductal	1.89031	-0.0711524
DS-56652	NOTCH2	1:120506197-120506430	58.78	Breast	Carcinoma, Ductal	1.76923	0.642344
DS-56652	NOTCH2	1:120508076-120508189	48.47	Breast	Carcinoma, Ductal	1.68547	0.369845
DS-56652	NOTCH2	1:120508999-120509112	265.39	Breast	Carcinoma, Ductal	2.42388	-0.0139306
DS-56652	NOTCH2	1:120510056-120510244	126.8	Breast	Carcinoma, Ductal	2.10312	-0.478202
DS-56652	NOTCH2	1:120510700-120510855	118.49	Breast	Carcinoma, Ductal	2.07368	0.262507
DS-56652	NOTCH2	1:120512134-120512367	111.8	Breast	Carcinoma, Ductal	2.04844	-0.694377
DS-56652	NOTCH2	1:120529583-120529705	111.83	Breast	Carcinoma, Ductal	2.04856	0.152425
DS-56652	NOTCH2	1:120539620-120539955	177.26	Breast	Carcinoma, Ductal	2.24861	-0.270952
DS-56652	NOTCH2	1:120547952-120548211	235.05	Breast	Carcinoma, Ductal	2.37116	-0.292726
DS-56652	NOTCH2	1:120572529-120572610	0	Breast	Carcinoma, Ductal		1.45847
DS-56652	NOTCH2	1:120611948-120612020	12	Breast	Carcinoma, Ductal	1.07918	-1.94406
DS-59727	NOTCH1	9:139390523-139392010	72.64	Breast	Carcinoma, NOS	1.86118	-1.02761
DS-59727	NOTCH1	9:139393351-139393448	588.6	Breast	Carcinoma, NOS	2.76982	-0.723328
DS-59727	NOTCH1	9:139393564-139393711	90.71	Breast	Carcinoma, NOS	1.95766	-0.835734
DS-59727	NOTCH1	9:139395004-139395299	70.21	Breast	Carcinoma, NOS	1.8464	-0.49729
DS-59727	NOTCH1	9:139396200-139396365	41.05	Breast	Carcinoma, NOS	1.61331	0.0968187
DS-59727	NOTCH1	9:139396453-139396540	77.81	Breast	Carcinoma, NOS	1.89104	-0.692408
DS-59727	NOTCH1	9:139396724-139396940	54.76	Breast	Carcinoma, NOS	1.73846	-0.382238
DS-59727	NOTCH1	9:139397634-139397782	124.32	Breast	Carcinoma, NOS	2.09454	-0.867128
DS-59727	NOTCH1	9:139399125-139399556	33.98	Breast	Carcinoma, NOS	1.53122	-0.0294896
DS-59727	NOTCH1	9:139399762-139400333	68.58	Breast	Carcinoma, NOS	1.8362	0.398042
DS-59727	NOTCH1	9:139400979-139401091	43.02	Breast	Carcinoma, NOS	1.63367	0.0128154
DS-59727	NOTCH1	9:139401168-139401425	39.62	Breast	Carcinoma, NOS	1.59791	-0.314934
DS-59727	NOTCH1	9:139401757-139401889	22.03	Breast	Carcinoma, NOS	1.34301	-1.2969
DS-59727	NOTCH1	9:139402407-139402591	77.31	Breast	Carcinoma, NOS	1.88824	-0.158108
DS-59727	NOTCH1	9:139402684-139402837	91.67	Breast	Carcinoma, NOS	1.96223	-0.973765
DS-59727	NOTCH1	9:139403322-139403523	9.83	Breast	Carcinoma, NOS	0.992554	-1.16644
DS-59727	NOTCH1	9:139404185-139404413	165.56	Breast	Carcinoma, NOS	2.21896	-0.512142
DS-59727	NOTCH1	9:139405105-139405257	91.37	Breast	Carcinoma, NOS	1.9608	0.741253
DS-59727	NOTCH1	9:139405604-139405723	145.54	Breast	Carcinoma, NOS	2.16298	0.580455
DS-59727	NOTCH1	9:139407473-139407586	283.62	Breast	Carcinoma, NOS	2.45274	-0.50693
DS-59727	NOTCH1	9:139407844-139407989	126.36	Breast	Carcinoma, NOS	2.10161	0.42105
DS-59727	NOTCH1	9:139408962-139409154	44.74	Breast	Carcinoma, NOS	1.6507	-0.135648
DS-59727	NOTCH1	9:139409742-139409852	247.96	Breast	Carcinoma, NOS	2.39438	-0.0586165
DS-59727	NOTCH1	9:139409935-139410168	34.1	Breast	Carcinoma, NOS	1.53275	-0.579758
DS-59727	NOTCH1	9:139410433-139410546	200.59	Breast	Carcinoma, NOS	2.30231	-0.0251034
DS-59727	NOTCH1	9:139411724-139411837	40.58	Breast	Carcinoma, NOS	1.60831	-0.139886
DS-59727	NOTCH1	9:139412204-139412389	227.6	Breast	Carcinoma, NOS	2.35717	-0.0516363
DS-59727	NOTCH1	9:139412589-139412744	48.37	Breast	Carcinoma, NOS	1.68458	-0.328959
DS-59727	NOTCH1	9:139413043-139413276	143.07	Breast	Carcinoma, NOS	2.15555	-1.16118
DS-59727	NOTCH1	9:139413895-139414017	263.8	Breast	Carcinoma, NOS	2.42127	0.0676956
DS-59727	NOTCH1	9:139417302-139417640	18.88	Breast	Carcinoma, NOS	1.276	0.616562
DS-59727	NOTCH1	9:139418169-139418431	40.95	Breast	Carcinoma, NOS	1.61225	0.573257
DS-59727	NOTCH1	9:139438476-139438554	25.04	Breast	Carcinoma, NOS	1.39863	0.15548
DS-59727	NOTCH1	9:139440178-139440238	0	Breast	Carcinoma, NOS		0.798675
DS-59727	NOTCH2	1:120457929-120459317	125.34	Breast	Carcinoma, NOS	2.09809	-0.565477
DS-59727	NOTCH2	1:120460288-120460385	128.49	Breast	Carcinoma, NOS	2.10887	0.215303
DS-59727	NOTCH2	1:120461029-120461176	169.84	Breast	Carcinoma, NOS	2.23004	0.197855
DS-59727	NOTCH2	1:120461935-120462236	95.77	Breast	Carcinoma, NOS	1.98123	-0.368305
DS-59727	NOTCH2	1:120462852-120463020	145.84	Breast	Carcinoma, NOS	2.16388	-0.243411
DS-59727	NOTCH2	1:120464336-120464432	188.07	Breast	Carcinoma, NOS	2.27432	0.591988
DS-59727	NOTCH2	1:120464859-120465069	169.51	Breast	Carcinoma, NOS	2.2292	0.132788
DS-59727	NOTCH2	1:120465259-120465401	72.06	Breast	Carcinoma, NOS	1.85769	-0.054637
DS-59727	NOTCH2	1:120466260-120466607	79.7	Breast	Carcinoma, NOS	1.90146	-0.80258
DS-59727	NOTCH2	1:120467928-120468433	204.24	Breast	Carcinoma, NOS	2.31014	-0.296182
DS-59727	NOTCH2	1:120469122-120469234	49.5	Breast	Carcinoma, NOS	1.69461	0.609617
DS-59727	NOTCH2	1:120471599-120471835	156.79	Breast	Carcinoma, NOS	2.19532	0.263009
DS-59727	NOTCH2	1:120478042-120478227	86.19	Breast	Carcinoma, NOS	1.93546	1.00635
DS-59727	NOTCH2	1:120479905-120480089	171.03	Breast	Carcinoma, NOS	2.23307	-0.270971
DS-59727	NOTCH2	1:120480480-120480633	114.18	Breast	Carcinoma, NOS	2.05759	-0.130458
DS-59727	NOTCH2	1:120483178-120483379	77.61	Breast	Carcinoma, NOS	1.88992	0.46847
DS-59727	NOTCH2	1:120484149-120484377	117.31	Breast	Carcinoma, NOS	2.06934	0.621707
DS-59727	NOTCH2	1:120491037-120491189	223.16	Breast	Carcinoma, NOS	2.34862	-0.603588
DS-59727	NOTCH2	1:120491630-120491749	276.23	Breast	Carcinoma, NOS	2.44127	0.4578
DS-59727	NOTCH2	1:120493347-120493460	314.57	Breast	Carcinoma, NOS	2.49772	0.724372
DS-59727	NOTCH2	1:120496166-120496311	295.47	Breast	Carcinoma, NOS	2.47051	0.548007
DS-59727	NOTCH2	1:120497663-120497855	209.32	Breast	Carcinoma, NOS	2.32081	0.339993
DS-59727	NOTCH2	1:120502015-120502125	108.64	Breast	Carcinoma, NOS	2.03599	0.234623
DS-59727	NOTCH2	1:120506197-120506430	53.39	Breast	Carcinoma, NOS	1.72746	-0.174503
DS-59727	NOTCH2	1:120508076-120508189	52.36	Breast	Carcinoma, NOS	1.719	0.316821
DS-59727	NOTCH2	1:120508999-120509112	381.3	Breast	Carcinoma, NOS	2.58127	0.789958
DS-59727	NOTCH2	1:120510056-120510244	159.66	Breast	Carcinoma, NOS	2.2032	0.223408
DS-59727	NOTCH2	1:120510700-120510855	136.19	Breast	Carcinoma, NOS	2.13415	0.549385
DS-59727	NOTCH2	1:120512134-120512367	138.25	Breast	Carcinoma, NOS	2.14067	-0.215058
DS-59727	NOTCH2	1:120529583-120529705	149.09	Breast	Carcinoma, NOS	2.17345	0.54366
DS-59727	NOTCH2	1:120539620-120539955	211.01	Breast	Carcinoma, NOS	2.3243	0.0879451
DS-59727	NOTCH2	1:120547952-120548211	246.65	Breast	Carcinoma, NOS	2.39208	-0.444778
DS-59727	NOTCH2	1:120572529-120572610	0.74	Breast	Carcinoma, NOS	-0.130768	-0.946897
DS-59727	NOTCH2	1:120611948-120612020	50.92	Breast	Carcinoma, NOS	1.70689	0.434607
DS-59741	NOTCH1	9:139390523-139392010	61.41	Breast	Carcinoma, Ductal	1.78824	0.498707
DS-59741	NOTCH1	9:139393351-139393448	467.92	Breast	Carcinoma, Ductal	2.67017	0.241594
DS-59741	NOTCH1	9:139393564-139393711	63.78	Breast	Carcinoma, Ductal	1.80468	-0.774785
DS-59741	NOTCH1	9:139395004-139395299	51.99	Breast	Carcinoma, Ductal	1.71592	-0.068967
DS-59741	NOTCH1	9:139396200-139396365	29.45	Breast	Carcinoma, Ductal	1.46909	0.258169
DS-59741	NOTCH1	9:139396453-139396540	64.69	Breast	Carcinoma, Ductal	1.81084	0.107868
DS-59741	NOTCH1	9:139396724-139396940	46.57	Breast	Carcinoma, Ductal	1.66811	0.616913
DS-59741	NOTCH1	9:139397634-139397782	116.43	Breast	Carcinoma, Ductal	2.06606	1.23839
DS-59741	NOTCH1	9:139399125-139399556	28.48	Breast	Carcinoma, Ductal	1.45454	0.955876
DS-59741	NOTCH1	9:139399762-139400333	45.41	Breast	Carcinoma, Ductal	1.65715	-0.0941275
DS-59741	NOTCH1	9:139400979-139401091	29.4	Breast	Carcinoma, Ductal	1.46835	-0.0609427
DS-59741	NOTCH1	9:139401168-139401425	36.11	Breast	Carcinoma, Ductal	1.55763	1.49701
DS-59741	NOTCH1	9:139401757-139401889	22.26	Breast	Carcinoma, Ductal	1.34753	0.366954
DS-59741	NOTCH1	9:139402407-139402591	57.65	Breast	Carcinoma, Ductal	1.7608	0.318812
DS-59741	NOTCH1	9:139402684-139402837	79.68	Breast	Carcinoma, Ductal	1.90135	0.771274
DS-59741	NOTCH1	9:139403322-139403523	9.63	Breast	Carcinoma, Ductal	0.983626	0.0327593
DS-59741	NOTCH1	9:139404185-139404413	120.4	Breast	Carcinoma, Ductal	2.08063	-0.125964
DS-59741	NOTCH1	9:139405105-139405257	65.57	Breast	Carcinoma, Ductal	1.81671	0.962684
DS-59741	NOTCH1	9:139405604-139405723	102.59	Breast	Carcinoma, Ductal	2.01111	0.701016
DS-59741	NOTCH1	9:139407473-139407586	217.68	Breast	Carcinoma, Ductal	2.33782	0.0520324
DS-59741	NOTCH1	9:139407844-139407989	75.71	Breast	Carcinoma, Ductal	1.87915	-0.489876
DS-59741	NOTCH1	9:139408962-139409154	38.06	Breast	Carcinoma, Ductal	1.58047	0.911229
DS-59741	NOTCH1	9:139409742-139409852	206.27	Breast	Carcinoma, Ductal	2.31444	1.30683
DS-59741	NOTCH1	9:139409935-139410168	27.93	Breast	Carcinoma, Ductal	1.44607	0.380276
DS-59741	NOTCH1	9:139410433-139410546	153.56	Breast	Carcinoma, Ductal	2.18628	0.74222
DS-59741	NOTCH1	9:139411724-139411837	40.34	Breast	Carcinoma, Ductal	1.60574	1.43325
DS-59741	NOTCH1	9:139412204-139412389	168.69	Breast	Carcinoma, Ductal	2.22709	0.564618
DS-59741	NOTCH1	9:139412589-139412744	38.74	Breast	Carcinoma, Ductal	1.58816	0.47134
DS-59741	NOTCH1	9:139413043-139413276	111.85	Breast	Carcinoma, Ductal	2.04864	-0.0422235
DS-59741	NOTCH1	9:139413895-139414017	184.51	Breast	Carcinoma, Ductal	2.26602	0.110379
DS-59741	NOTCH1	9:139417302-139417640	13.21	Breast	Carcinoma, Ductal	1.1209	0.647654
DS-59741	NOTCH1	9:139418169-139418431	30.12	Breast	Carcinoma, Ductal	1.47885	0.946839
DS-59741	NOTCH1	9:139438476-139438554	16.53	Breast	Carcinoma, Ductal	1.21827	-0.0212648
DS-59741	NOTCH1	9:139440178-139440238	1.07	Breast	Carcinoma, Ductal	0.0293838	-1.17353
DS-59741	NOTCH2	1:120457929-120459317	143.6	Breast	Carcinoma, Ductal	2.15715	0.253798
DS-59741	NOTCH2	1:120460288-120460385	117.4	Breast	Carcinoma, Ductal	2.06967	0.201193
DS-59741	NOTCH2	1:120461029-120461176	167.77	Breast	Carcinoma, Ductal	2.22471	0.627822
DS-59741	NOTCH2	1:120461935-120462236	110.48	Breast	Carcinoma, Ductal	2.04328	0.474844
DS-59741	NOTCH2	1:120462852-120463020	181.02	Breast	Carcinoma, Ductal	2.25773	0.916756
DS-59741	NOTCH2	1:120464336-120464432	166.22	Breast	Carcinoma, Ductal	2.22068	0.513063
DS-59741	NOTCH2	1:120464859-120465069	178.99	Breast	Carcinoma, Ductal	2.25283	0.685082
DS-59741	NOTCH2	1:120465259-120465401	73.88	Breast	Carcinoma, Ductal	1.86853	0.360877
DS-59741	NOTCH2	1:120466260-120466607	74.69	Breast	Carcinoma, Ductal	1.87326	-0.677057
DS-59741	NOTCH2	1:120467928-120468433	189.89	Breast	Carcinoma, Ductal	2.2785	-0.234172
DS-59741	NOTCH2	1:120469122-120469234	36.67	Breast	Carcinoma, Ductal	1.56431	-0.306048
DS-59741	NOTCH2	1:120471599-120471835	145.42	Breast	Carcinoma, Ductal	2.16262	0.310937
DS-59741	NOTCH2	1:120478042-120478227	72.54	Breast	Carcinoma, Ductal	1.86058	0.681387
DS-59741	NOTCH2	1:120479905-120480089	177.78	Breast	Carcinoma, Ductal	2.24988	0.173943
DS-59741	NOTCH2	1:120480480-120480633	122	Breast	Carcinoma, Ductal	2.08636	0.63088
DS-59741	NOTCH2	1:120483178-120483379	81.18	Breast	Carcinoma, Ductal	1.90945	1.17439
DS-59741	NOTCH2	1:120484149-120484377	115.99	Breast	Carcinoma, Ductal	2.06442	0.888502
DS-59741	NOTCH2	1:120491037-120491189	235.25	Breast	Carcinoma, Ductal	2.37153	0.333213
DS-59741	NOTCH2	1:120491630-120491749	280.31	Breast	Carcinoma, Ductal	2.44764	0.796025
DS-59741	NOTCH2	1:120493347-120493460	315.62	Breast	Carcinoma, Ductal	2.49916	1.48433
DS-59741	NOTCH2	1:120496166-120496311	275.32	Breast	Carcinoma, Ductal	2.43984	0.575485
DS-59741	NOTCH2	1:120497663-120497855	189.64	Breast	Carcinoma, Ductal	2.27793	0.226338
DS-59741	NOTCH2	1:120502015-120502125	108.15	Breast	Carcinoma, Ductal	2.03403	0.335664
DS-59741	NOTCH2	1:120506197-120506430	51.71	Breast	Carcinoma, Ductal	1.71357	0.057948
DS-59741	NOTCH2	1:120508076-120508189	51.72	Breast	Carcinoma, Ductal	1.71366	0.595278
DS-59741	NOTCH2	1:120508999-120509112	309.82	Breast	Carcinoma, Ductal	2.49111	0.427471
DS-59741	NOTCH2	1:120510056-120510244	151.51	Breast	Carcinoma, Ductal	2.18044	0.388908
DS-59741	NOTCH2	1:120510700-120510855	113.56	Breast	Carcinoma, Ductal	2.05523	-0.0255334
DS-59741	NOTCH2	1:120512134-120512367	134.24	Breast	Carcinoma, Ductal	2.12788	0.00562623
DS-59741	NOTCH2	1:120529583-120529705	130.22	Breast	Carcinoma, Ductal	2.11468	0.443977
DS-59741	NOTCH2	1:120539620-120539955	199.1	Breast	Carcinoma, Ductal	2.29907	0.205135
DS-59741	NOTCH2	1:120547952-120548211	251.69	Breast	Carcinoma, Ductal	2.40087	-0.0710538
DS-59741	NOTCH2	1:120572529-120572610	0.09	Breast	Carcinoma, Ductal	-1.04576	-1.90729
DS-59741	NOTCH2	1:120611948-120612020	62.08	Breast	Carcinoma, Ductal	1.79295	0.932439
DS-59745	NOTCH1	9:139390523-139392010	39.75	Breast	Carcinosarcoma, Metaplastic, NOS	1.59934	-0.341162
DS-59745	NOTCH1	9:139393351-139393448	317.01	Breast	Carcinosarcoma, Metaplastic, NOS	2.50107	-0.204557
DS-59745	NOTCH1	9:139393564-139393711	49.42	Breast	Carcinosarcoma, Metaplastic, NOS	1.6939	-0.371949
DS-59745	NOTCH1	9:139395004-139395299	32.51	Breast	Carcinosarcoma, Metaplastic, NOS	1.51202	-1.03809
DS-59745	NOTCH1	9:139396200-139396365	19.14	Breast	Carcinosarcoma, Metaplastic, NOS	1.28194	-0.278357
DS-59745	NOTCH1	9:139396453-139396540	48.13	Breast	Carcinosarcoma, Metaplastic, NOS	1.68242	0.250535
DS-59745	NOTCH1	9:139396724-139396940	24.16	Breast	Carcinosarcoma, Metaplastic, NOS	1.3831	-1.01567
DS-59745	NOTCH1	9:139397634-139397782	62.38	Breast	Carcinosarcoma, Metaplastic, NOS	1.79505	-0.859336
DS-59745	NOTCH1	9:139399125-139399556	15.94	Breast	Carcinosarcoma, Metaplastic, NOS	1.20249	-0.379164
DS-59745	NOTCH1	9:139399762-139400333	31.52	Breast	Carcinosarcoma, Metaplastic, NOS	1.49859	-0.471005
DS-59745	NOTCH1	9:139400979-139401091	20.25	Breast	Carcinosarcoma, Metaplastic, NOS	1.30643	-0.252122
DS-59745	NOTCH1	9:139401168-139401425	16.16	Breast	Carcinosarcoma, Metaplastic, NOS	1.20844	-1.69575
DS-59745	NOTCH1	9:139401757-139401889	12.03	Breast	Carcinosarcoma, Metaplastic, NOS	1.08027	-0.915144
DS-59745	NOTCH1	9:139402407-139402591	45.49	Breast	Carcinosarcoma, Metaplastic, NOS	1.65792	0.938449
DS-59745	NOTCH1	9:139402684-139402837	56.15	Breast	Carcinosarcoma, Metaplastic, NOS	1.74935	0.59549
DS-59745	NOTCH1	9:139403322-139403523	5.87	Breast	Carcinosarcoma, Metaplastic, NOS	0.768638	-0.553491
DS-59745	NOTCH1	9:139404185-139404413	89.14	Breast	Carcinosarcoma, Metaplastic, NOS	1.95007	0.106704
DS-59745	NOTCH1	9:139405105-139405257	36.99	Breast	Carcinosarcoma, Metaplastic, NOS	1.56808	-0.765218
DS-59745	NOTCH1	9:139405604-139405723	59.21	Breast	Carcinosarcoma, Metaplastic, NOS	1.7724	-1.28588
DS-59745	NOTCH1	9:139407473-139407586	153.72	Breast	Carcinosarcoma, Metaplastic, NOS	2.18673	-0.0634476
DS-59745	NOTCH1	9:139407844-139407989	67.18	Breast	Carcinosarcoma, Metaplastic, NOS	1.82724	0.781398
DS-59745	NOTCH1	9:139408962-139409154	26.92	Breast	Carcinosarcoma, Metaplastic, NOS	1.43008	0.813718
DS-59745	NOTCH1	9:139409742-139409852	118.68	Breast	Carcinosarcoma, Metaplastic, NOS	2.07438	-0.410227
DS-59745	NOTCH1	9:139409935-139410168	18.97	Breast	Carcinosarcoma, Metaplastic, NOS	1.27807	0.0321862
DS-59745	NOTCH1	9:139410433-139410546	90.11	Breast	Carcinosarcoma, Metaplastic, NOS	1.95477	-0.900309
DS-59745	NOTCH1	9:139411724-139411837	15.58	Breast	Carcinosarcoma, Metaplastic, NOS	1.19257	-1.3137
DS-59745	NOTCH1	9:139412204-139412389	97.15	Breast	Carcinosarcoma, Metaplastic, NOS	1.98744	-1.60645
DS-59745	NOTCH1	9:139412589-139412744	22.1	Breast	Carcinosarcoma, Metaplastic, NOS	1.34439	-0.853795
DS-59745	NOTCH1	9:139413043-139413276	79.73	Breast	Carcinosarcoma, Metaplastic, NOS	1.90162	-0.147276
DS-59745	NOTCH1	9:139413895-139414017	122.37	Breast	Carcinosarcoma, Metaplastic, NOS	2.08767	-0.512001
DS-59745	NOTCH1	9:139417302-139417640	9.54	Breast	Carcinosarcoma, Metaplastic, NOS	0.979548	0.658154
DS-59745	NOTCH1	9:139418169-139418431	18.02	Breast	Carcinosarcoma, Metaplastic, NOS	1.25575	-0.294612
DS-59745	NOTCH1	9:139438476-139438554	17.28	Breast	Carcinosarcoma, Metaplastic, NOS	1.23754	1.24015
DS-59745	NOTCH1	9:139440178-139440238	0	Breast	Carcinosarcoma, Metaplastic, NOS		0.798675
DS-59745	NOTCH2	1:120457929-120459317	137.37	Breast	Carcinosarcoma, Metaplastic, NOS	2.13789	-0.146369
DS-59745	NOTCH2	1:120460288-120460385	137.7	Breast	Carcinosarcoma, Metaplastic, NOS	2.13893	0.471442
DS-59745	NOTCH2	1:120461029-120461176	143.93	Breast	Carcinosarcoma, Metaplastic, NOS	2.15815	-0.650207
DS-59745	NOTCH2	1:120461935-120462236	91.59	Breast	Carcinosarcoma, Metaplastic, NOS	1.96185	-0.453617
DS-59745	NOTCH2	1:120462852-120463020	129.01	Breast	Carcinosarcoma, Metaplastic, NOS	2.11062	-0.632535
DS-59745	NOTCH2	1:120464336-120464432	143.07	Breast	Carcinosarcoma, Metaplastic, NOS	2.15555	0.0719779
DS-59745	NOTCH2	1:120464859-120465069	139.32	Breast	Carcinosarcoma, Metaplastic, NOS	2.14401	-0.557553
DS-59745	NOTCH2	1:120465259-120465401	63.26	Breast	Carcinosarcoma, Metaplastic, NOS	1.80113	-0.464481
DS-59745	NOTCH2	1:120466260-120466607	90.26	Breast	Carcinosarcoma, Metaplastic, NOS	1.9555	0.098193
DS-59745	NOTCH2	1:120467928-120468433	199.67	Breast	Carcinosarcoma, Metaplastic, NOS	2.30031	-0.301612
DS-59745	NOTCH2	1:120469122-120469234	33.54	Breast	Carcinosarcoma, Metaplastic, NOS	1.52556	-0.958172
DS-59745	NOTCH2	1:120471599-120471835	128.73	Breast	Carcinosarcoma, Metaplastic, NOS	2.10968	-0.580281
DS-59745	NOTCH2	1:120478042-120478227	81.05	Breast	Carcinosarcoma, Metaplastic, NOS	1.90875	0.857407
DS-59745	NOTCH2	1:120479905-120480089	157.84	Breast	Carcinosarcoma, Metaplastic, NOS	2.19822	-0.481687
DS-59745	NOTCH2	1:120480480-120480633	119.62	Breast	Carcinosarcoma, Metaplastic, NOS	2.0778	0.21168
DS-59745	NOTCH2	1:120483178-120483379	79.33	Breast	Carcinosarcoma, Metaplastic, NOS	1.89944	0.70405
DS-59745	NOTCH2	1:120484149-120484377	102.87	Breast	Carcinosarcoma, Metaplastic, NOS	2.01229	0.225522
DS-59745	NOTCH2	1:120491037-120491189	242.39	Breast	Carcinosarcoma, Metaplastic, NOS	2.38451	0.103655
DS-59745	NOTCH2	1:120491630-120491749	265.1	Breast	Carcinosarcoma, Metaplastic, NOS	2.42341	0.391514
DS-59745	NOTCH2	1:120493347-120493460	304.09	Breast	Carcinosarcoma, Metaplastic, NOS	2.483	0.618521
DS-59745	NOTCH2	1:120496166-120496311	265.81	Breast	Carcinosarcoma, Metaplastic, NOS	2.42457	0.389793
DS-59745	NOTCH2	1:120497663-120497855	195.76	Breast	Carcinosarcoma, Metaplastic, NOS	2.29172	-0.043272
DS-59745	NOTCH2	1:120502015-120502125	126.84	Breast	Carcinosarcoma, Metaplastic, NOS	2.10326	0.455404
DS-59745	NOTCH2	1:120506197-120506430	48.1	Breast	Carcinosarcoma, Metaplastic, NOS	1.68215	-0.535659
DS-59745	NOTCH2	1:120508076-120508189	71.24	Breast	Carcinosarcoma, Metaplastic, NOS	1.85272	1.57411
DS-59745	NOTCH2	1:120508999-120509112	326.71	Breast	Carcinosarcoma, Metaplastic, NOS	2.51416	0.395943
DS-59745	NOTCH2	1:120510056-120510244	163.11	Breast	Carcinosarcoma, Metaplastic, NOS	2.21248	0.43952
DS-59745	NOTCH2	1:120510700-120510855	111.28	Breast	Carcinosarcoma, Metaplastic, NOS	2.04642	-0.526229
DS-59745	NOTCH2	1:120512134-120512367	125.04	Breast	Carcinosarcoma, Metaplastic, NOS	2.09705	-0.526886
DS-59745	NOTCH2	1:120529583-120529705	123.74	Breast	Carcinosarcoma, Metaplastic, NOS	2.09251	0.215454
DS-59745	NOTCH2	1:120539620-120539955	184.39	Breast	Carcinosarcoma, Metaplastic, NOS	2.26574	-0.40086
DS-59745	NOTCH2	1:120547952-120548211	257.43	Breast	Carcinosarcoma, Metaplastic, NOS	2.41066	-0.216912
DS-59745	NOTCH2	1:120572529-120572610	4.56	Breast	Carcinosarcoma, Metaplastic, NOS	0.658965	-0.072779
DS-59745	NOTCH2	1:120611948-120612020	28.82	Breast	Carcinosarcoma, Metaplastic, NOS	1.45969	-0.527296
DS-59747	NOTCH1	9:139390523-139392010	34.41	Breast	Carcinoma, Ductal	1.53668	0.190575
DS-59747	NOTCH1	9:139393351-139393448	285.22	Breast	Carcinoma, Ductal	2.45518	0.564629
DS-59747	NOTCH1	9:139393564-139393711	41.7	Breast	Carcinoma, Ductal	1.62014	-0.136016
DS-59747	NOTCH1	9:139395004-139395299	30.57	Breast	Carcinoma, Ductal	1.4853	-0.0090547
DS-59747	NOTCH1	9:139396200-139396365	13.73	Breast	Carcinoma, Ductal	1.13767	-0.900658
DS-59747	NOTCH1	9:139396453-139396540	36.83	Breast	Carcinoma, Ductal	1.5662	0.00259331
DS-59747	NOTCH1	9:139396724-139396940	25.36	Breast	Carcinoma, Ductal	1.40415	0.279331
DS-59747	NOTCH1	9:139397634-139397782	58.74	Breast	Carcinoma, Ductal	1.76893	0.217111
DS-59747	NOTCH1	9:139399125-139399556	9.34	Breast	Carcinoma, Ductal	0.970347	-2.08064
DS-59747	NOTCH1	9:139399762-139400333	21.83	Breast	Carcinoma, Ductal	1.33905	-2.02588
DS-59747	NOTCH1	9:139400979-139401091	16.11	Breast	Carcinoma, Ductal	1.2071	-0.321452
DS-59747	NOTCH1	9:139401168-139401425	12.77	Breast	Carcinoma, Ductal	1.10619	-1.85092
DS-59747	NOTCH1	9:139401757-139401889	8.96	Breast	Carcinoma, Ductal	0.952308	-1.28193
DS-59747	NOTCH1	9:139402407-139402591	40.55	Breast	Carcinoma, Ductal	1.60799	1.60387
DS-59747	NOTCH1	9:139402684-139402837	37.1	Breast	Carcinoma, Ductal	1.56937	-0.986131
DS-59747	NOTCH1	9:139403322-139403523	4.63	Breast	Carcinoma, Ductal	0.665581	-0.641044
DS-59747	NOTCH1	9:139404185-139404413	79.55	Breast	Carcinoma, Ductal	1.90064	0.957819
DS-59747	NOTCH1	9:139405105-139405257	23.41	Breast	Carcinoma, Ductal	1.3694	-2.49494
DS-59747	NOTCH1	9:139405604-139405723	58.64	Breast	Carcinoma, Ductal	1.76819	0.526462
DS-59747	NOTCH1	9:139407473-139407586	109.46	Breast	Carcinoma, Ductal	2.03926	-0.785212
DS-59747	NOTCH1	9:139407844-139407989	46.45	Breast	Carcinoma, Ductal	1.66699	-0.176474
DS-59747	NOTCH1	9:139408962-139409154	17.99	Breast	Carcinoma, Ductal	1.25503	-0.177495
DS-59747	NOTCH1	9:139409742-139409852	110.71	Breast	Carcinoma, Ductal	2.04419	0.678168
DS-59747	NOTCH1	9:139409935-139410168	9.5	Breast	Carcinoma, Ductal	0.977724	-2.78047
DS-59747	NOTCH1	9:139410433-139410546	79.96	Breast	Carcinoma, Ductal	1.90287	-0.158871
DS-59747	NOTCH1	9:139411724-139411837	18.75	Breast	Carcinoma, Ductal	1.273	0.436587
DS-59747	NOTCH1	9:139412204-139412389	100.72	Breast	Carcinoma, Ductal	2.00312	0.797824
DS-59747	NOTCH1	9:139412589-139412744	16.87	Breast	Carcinoma, Ductal	1.22712	-1.1812
DS-59747	NOTCH1	9:139413043-139413276	71.11	Breast	Carcinoma, Ductal	1.85193	0.788569
DS-59747	NOTCH1	9:139413895-139414017	124.93	Breast	Carcinoma, Ductal	2.09667	1.23238
DS-59747	NOTCH1	9:139417302-139417640	6.4	Breast	Carcinoma, Ductal	0.80618	-0.300916
DS-59747	NOTCH1	9:139418169-139418431	20.15	Breast	Carcinoma, Ductal	1.30428	1.86585
DS-59747	NOTCH1	9:139438476-139438554	10.67	Breast	Carcinoma, Ductal	1.02816	0.324932
DS-59747	NOTCH1	9:139440178-139440238	0	Breast	Carcinoma, Ductal		0.798675
DS-59747	NOTCH2	1:120457929-120459317	100.32	Breast	Carcinoma, Ductal	2.00139	-0.244009
DS-59747	NOTCH2	1:120460288-120460385	125.94	Breast	Carcinoma, Ductal	2.10016	1.03207
DS-59747	NOTCH2	1:120461029-120461176	132.81	Breast	Carcinoma, Ductal	2.12323	0.572145
DS-59747	NOTCH2	1:120461935-120462236	78.63	Breast	Carcinoma, Ductal	1.89559	0.0466718
DS-59747	NOTCH2	1:120462852-120463020	115.31	Breast	Carcinoma, Ductal	2.06187	0.0437783
DS-59747	NOTCH2	1:120464336-120464432	173.35	Breast	Carcinoma, Ductal	2.23892	1.06256
DS-59747	NOTCH2	1:120464859-120465069	115.66	Breast	Carcinoma, Ductal	2.06318	-0.154947
DS-59747	NOTCH2	1:120465259-120465401	46.74	Breast	Carcinoma, Ductal	1.66969	-0.519943
DS-59747	NOTCH2	1:120466260-120466607	64.42	Breast	Carcinoma, Ductal	1.80902	-0.20621
DS-59747	NOTCH2	1:120467928-120468433	155.39	Breast	Carcinoma, Ductal	2.19142	-0.115708
DS-59747	NOTCH2	1:120469122-120469234	32.41	Breast	Carcinoma, Ductal	1.51068	0.123449
DS-59747	NOTCH2	1:120471599-120471835	107.83	Breast	Carcinoma, Ductal	2.03274	-0.0484151
DS-59747	NOTCH2	1:120478042-120478227	63.35	Breast	Carcinoma, Ductal	1.80175	1.01234
DS-59747	NOTCH2	1:120479905-120480089	114.85	Breast	Carcinoma, Ductal	2.06013	-0.589395
DS-59747	NOTCH2	1:120480480-120480633	94.58	Breast	Carcinoma, Ductal	1.9758	0.478352
DS-59747	NOTCH2	1:120483178-120483379	53.23	Breast	Carcinoma, Ductal	1.72616	0.10212
DS-59747	NOTCH2	1:120484149-120484377	84.07	Breast	Carcinoma, Ductal	1.92464	0.536255
DS-59747	NOTCH2	1:120491037-120491189	156.25	Breast	Carcinoma, Ductal	2.19382	-0.922224
DS-59747	NOTCH2	1:120491630-120491749	226.45	Breast	Carcinoma, Ductal	2.35497	0.832747
DS-59747	NOTCH2	1:120493347-120493460	228.9	Breast	Carcinoma, Ductal	2.35965	0.65201
DS-59747	NOTCH2	1:120496166-120496311	267.96	Breast	Carcinoma, Ductal	2.42807	0.945699
DS-59747	NOTCH2	1:120497663-120497855	165.46	Breast	Carcinoma, Ductal	2.21869	0.967217
DS-59747	NOTCH2	1:120502015-120502125	122.05	Breast	Carcinoma, Ductal	2.08654	0.767558
DS-59747	NOTCH2	1:120506197-120506430	31.84	Breast	Carcinoma, Ductal	1.50297	-1.07922
DS-59747	NOTCH2	1:120508076-120508189	37.23	Breast	Carcinoma, Ductal	1.57089	0.196445
DS-59747	NOTCH2	1:120508999-120509112	286.24	Breast	Carcinoma, Ductal	2.45673	0.857309
DS-59747	NOTCH2	1:120510056-120510244	113.86	Breast	Carcinoma, Ductal	2.05637	0.0794466
DS-59747	NOTCH2	1:120510700-120510855	94	Breast	Carcinoma, Ductal	1.97313	0.184184
DS-59747	NOTCH2	1:120512134-120512367	105.95	Breast	Carcinoma, Ductal	2.0251	-0.0435492
DS-59747	NOTCH2	1:120529583-120529705	106.06	Breast	Carcinoma, Ductal	2.02555	0.481812
DS-59747	NOTCH2	1:120539620-120539955	129.32	Breast	Carcinoma, Ductal	2.11167	-0.689116
DS-59747	NOTCH2	1:120547952-120548211	186.05	Breast	Carcinoma, Ductal	2.26963	-0.347246
DS-59747	NOTCH2	1:120572529-120572610	0.59	Breast	Carcinoma, Ductal	-0.229148	-0.907486
DS-59747	NOTCH2	1:120611948-120612020	14.32	Breast	Carcinoma, Ductal	1.15594	-1.25002
DS-59748	NOTCH1	9:139390523-139392010	54.15	Breast	Carcinoma, Lobular	1.7336	0.562932
DS-59748	NOTCH1	9:139393351-139393448	382.72	Breast	Carcinoma, Lobular	2.58288	-0.241544
DS-59748	NOTCH1	9:139393564-139393711	69.53	Breast	Carcinoma, Lobular	1.84217	0.450523
DS-59748	NOTCH1	9:139395004-139395299	48.46	Breast	Carcinoma, Lobular	1.68538	0.365968
DS-59748	NOTCH1	9:139396200-139396365	20.04	Breast	Carcinoma, Lobular	1.3019	-1.04405
DS-59748	NOTCH1	9:139396453-139396540	55.27	Breast	Carcinoma, Lobular	1.74249	0.00321422
DS-59748	NOTCH1	9:139396724-139396940	38.27	Breast	Carcinoma, Lobular	1.58286	0.30771
DS-59748	NOTCH1	9:139397634-139397782	86.22	Breast	Carcinoma, Lobular	1.93561	0.0614878
DS-59748	NOTCH1	9:139399125-139399556	25.53	Breast	Carcinoma, Lobular	1.40705	1.0862
DS-59748	NOTCH1	9:139399762-139400333	41.98	Breast	Carcinoma, Lobular	1.62304	0.462333
DS-59748	NOTCH1	9:139400979-139401091	25.29	Breast	Carcinoma, Lobular	1.40295	-0.130791
DS-59748	NOTCH1	9:139401168-139401425	31.12	Breast	Carcinoma, Lobular	1.49304	1.39859
DS-59748	NOTCH1	9:139401757-139401889	20.95	Breast	Carcinoma, Lobular	1.32118	0.69377
DS-59748	NOTCH1	9:139402407-139402591	50.76	Breast	Carcinoma, Lobular	1.70552	0.364953
DS-59748	NOTCH1	9:139402684-139402837	81.13	Breast	Carcinoma, Lobular	1.90918	1.96116
DS-59748	NOTCH1	9:139403322-139403523	14.98	Breast	Carcinoma, Lobular	1.17551	2.04826
DS-59748	NOTCH1	9:139404185-139404413	112.79	Breast	Carcinoma, Lobular	2.05227	0.468231
DS-59748	NOTCH1	9:139405105-139405257	53.16	Breast	Carcinoma, Lobular	1.72558	0.428098
DS-59748	NOTCH1	9:139405604-139405723	82.5	Breast	Carcinoma, Lobular	1.91645	-0.0495796
DS-59748	NOTCH1	9:139407473-139407586	215.46	Breast	Carcinoma, Lobular	2.33337	0.753884
DS-59748	NOTCH1	9:139407844-139407989	83.12	Breast	Carcinoma, Lobular	1.91971	0.900052
DS-59748	NOTCH1	9:139408962-139409154	33.63	Breast	Carcinoma, Lobular	1.52673	0.964668
DS-59748	NOTCH1	9:139409742-139409852	169.05	Breast	Carcinoma, Lobular	2.22802	0.811592
DS-59748	NOTCH1	9:139409935-139410168	28.04	Breast	Carcinoma, Lobular	1.44778	1.18989
DS-59748	NOTCH1	9:139410433-139410546	148.48	Breast	Carcinoma, Lobular	2.17167	1.54449
DS-59748	NOTCH1	9:139411724-139411837	47.74	Breast	Carcinoma, Lobular	1.67888	2.76508
DS-59748	NOTCH1	9:139412204-139412389	134.66	Breast	Carcinoma, Lobular	2.12924	-0.318981
DS-59748	NOTCH1	9:139412589-139412744	35.03	Breast	Carcinoma, Lobular	1.54444	0.660458
DS-59748	NOTCH1	9:139413043-139413276	103.17	Breast	Carcinoma, Lobular	2.01355	0.466987
DS-59748	NOTCH1	9:139413895-139414017	157.36	Breast	Carcinoma, Lobular	2.19689	-0.0778247
DS-59748	NOTCH1	9:139417302-139417640	14.35	Breast	Carcinoma, Lobular	1.15685	1.76011
DS-59748	NOTCH1	9:139418169-139418431	26.48	Breast	Carcinoma, Lobular	1.42292	0.981717
DS-59748	NOTCH1	9:139438476-139438554	12.89	Breast	Carcinoma, Lobular	1.11025	-0.410288
DS-59748	NOTCH1	9:139440178-139440238	0.23	Breast	Carcinoma, Lobular	-0.638272	-1.88598
DS-59748	NOTCH2	1:120457929-120459317	146.07	Breast	Carcinoma, Lobular	2.16456	-0.671747
DS-59748	NOTCH2	1:120460288-120460385	115.35	Breast	Carcinoma, Lobular	2.06202	-0.602016
DS-59748	NOTCH2	1:120461029-120461176	172.07	Breast	Carcinoma, Lobular	2.23571	-0.795835
DS-59748	NOTCH2	1:120461935-120462236	123.8	Breast	Carcinoma, Lobular	2.09272	-0.0912782
DS-59748	NOTCH2	1:120462852-120463020	150.23	Breast	Carcinoma, Lobular	2.17676	-0.828957
DS-59748	NOTCH2	1:120464336-120464432	144.19	Breast	Carcinoma, Lobular	2.15894	-0.331546
DS-59748	NOTCH2	1:120464859-120465069	140.46	Breast	Carcinoma, Lobular	2.14755	-1.32916
DS-59748	NOTCH2	1:120465259-120465401	78.51	Breast	Carcinoma, Lobular	1.89492	-0.416699
DS-59748	NOTCH2	1:120466260-120466607	95.64	Breast	Carcinoma, Lobular	1.98064	-0.799095
DS-59748	NOTCH2	1:120467928-120468433	213.47	Breast	Carcinoma, Lobular	2.32934	-0.983335
DS-59748	NOTCH2	1:120469122-120469234	49.94	Breast	Carcinoma, Lobular	1.69845	-0.127637
DS-59748	NOTCH2	1:120471599-120471835	156.76	Breast	Carcinoma, Lobular	2.19524	-0.61053
DS-59748	NOTCH2	1:120478042-120478227	65.67	Breast	Carcinoma, Lobular	1.81737	-0.685238
DS-59748	NOTCH2	1:120479905-120480089	185.6	Breast	Carcinoma, Lobular	2.26858	-0.62986
DS-59748	NOTCH2	1:120480480-120480633	132.18	Breast	Carcinoma, Lobular	2.12117	-0.308185
DS-59748	NOTCH2	1:120483178-120483379	89.29	Breast	Carcinoma, Lobular	1.9508	0.243184
DS-59748	NOTCH2	1:120484149-120484377	102.33	Breast	Carcinoma, Lobular	2.01	-0.526946
DS-59748	NOTCH2	1:120491037-120491189	279.57	Breast	Carcinoma, Lobular	2.44649	-0.307617
DS-59748	NOTCH2	1:120491630-120491749	258.16	Breast	Carcinoma, Lobular	2.41189	-0.38639
DS-59748	NOTCH2	1:120493347-120493460	301.78	Breast	Carcinoma, Lobular	2.47969	-1.19074
DS-59748	NOTCH2	1:120496166-120496311	243.16	Breast	Carcinoma, Lobular	2.38589	-0.159282
DS-59748	NOTCH2	1:120497663-120497855	208.74	Breast	Carcinoma, Lobular	2.31961	-1.21672
DS-59748	NOTCH2	1:120502015-120502125	113.6	Breast	Carcinoma, Lobular	2.05538	0.0630421
DS-59748	NOTCH2	1:120506197-120506430	59.97	Breast	Carcinoma, Lobular	1.77793	-0.460361
DS-59748	NOTCH2	1:120508076-120508189	60.8	Breast	Carcinoma, Lobular	1.7839	0.193517
DS-59748	NOTCH2	1:120508999-120509112	311.76	Breast	Carcinoma, Lobular	2.49382	-0.345259
DS-59748	NOTCH2	1:120510056-120510244	169.16	Breast	Carcinoma, Lobular	2.2283	-0.400736
DS-59748	NOTCH2	1:120510700-120510855	130.79	Breast	Carcinoma, Lobular	2.11657	-0.775114
DS-59748	NOTCH2	1:120512134-120512367	170.33	Breast	Carcinoma, Lobular	2.23129	-0.108659
DS-59748	NOTCH2	1:120529583-120529705	122.78	Breast	Carcinoma, Lobular	2.08913	-0.204872
DS-59748	NOTCH2	1:120539620-120539955	334.38	Breast	Carcinoma, Lobular	2.52424	1.28986
DS-59748	NOTCH2	1:120547952-120548211	445.38	Breast	Carcinoma, Lobular	2.64873	1.00489
DS-59748	NOTCH2	1:120572529-120572610	0	Breast	Carcinoma, Lobular		1.45847
DS-59748	NOTCH2	1:120611948-120612020	35.97	Breast	Carcinoma, Lobular	1.55594	-0.495125
DS-59764	NOTCH1	9:139390523-139392010	28.22	Breast	Carcinoma, Ductal	1.45056	-1.21426
DS-59764	NOTCH1	9:139393351-139393448	264.61	Breast	Carcinoma, Ductal	2.42261	0.157752
DS-59764	NOTCH1	9:139393564-139393711	42.57	Breast	Carcinoma, Ductal	1.6291	0.0822938
DS-59764	NOTCH1	9:139395004-139395299	28.52	Breast	Carcinoma, Ductal	1.45515	-0.355836
DS-59764	NOTCH1	9:139396200-139396365	17.18	Breast	Carcinoma, Ductal	1.23502	0.359218
DS-59764	NOTCH1	9:139396453-139396540	43.75	Breast	Carcinoma, Ductal	1.64098	0.857845
DS-59764	NOTCH1	9:139396724-139396940	23.21	Breast	Carcinoma, Ductal	1.36568	-0.0682104
DS-59764	NOTCH1	9:139397634-139397782	71.93	Breast	Carcinoma, Ductal	1.85691	1.78187
DS-59764	NOTCH1	9:139399125-139399556	12.62	Breast	Carcinoma, Ductal	1.10106	-0.393189
DS-59764	NOTCH1	9:139399762-139400333	25.16	Breast	Carcinoma, Ductal	1.40071	-0.415594
DS-59764	NOTCH1	9:139400979-139401091	11.5	Breast	Carcinoma, Ductal	1.0607	-1.66516
DS-59764	NOTCH1	9:139401168-139401425	14.41	Breast	Carcinoma, Ductal	1.15866	-0.916653
DS-59764	NOTCH1	9:139401757-139401889	17.02	Breast	Carcinoma, Ductal	1.23096	1.65866
DS-59764	NOTCH1	9:139402407-139402591	30.47	Breast	Carcinoma, Ductal	1.48387	-0.222873
DS-59764	NOTCH1	9:139402684-139402837	35.68	Breast	Carcinoma, Ductal	1.55242	-1.14589
DS-59764	NOTCH1	9:139403322-139403523	3.47	Breast	Carcinoma, Ductal	0.540329	-1.58531
DS-59764	NOTCH1	9:139404185-139404413	65.32	Breast	Carcinoma, Ductal	1.81505	-0.58499
DS-59764	NOTCH1	9:139405105-139405257	30.05	Breast	Carcinoma, Ductal	1.47784	-0.602211
DS-59764	NOTCH1	9:139405604-139405723	55.11	Breast	Carcinoma, Ductal	1.74123	0.137571
DS-59764	NOTCH1	9:139407473-139407586	118.92	Breast	Carcinoma, Ductal	2.07525	-0.209677
DS-59764	NOTCH1	9:139407844-139407989	42.4	Breast	Carcinoma, Ductal	1.62737	-0.620323
DS-59764	NOTCH1	9:139408962-139409154	13.53	Breast	Carcinoma, Ductal	1.1313	-1.56112
DS-59764	NOTCH1	9:139409742-139409852	90.24	Breast	Carcinoma, Ductal	1.9554	-0.738543
DS-59764	NOTCH1	9:139409935-139410168	15.45	Breast	Carcinoma, Ductal	1.18893	0.182669
DS-59764	NOTCH1	9:139410433-139410546	79.4	Breast	Carcinoma, Ductal	1.89982	-0.0663119
DS-59764	NOTCH1	9:139411724-139411837	16.37	Breast	Carcinoma, Ductal	1.21405	-0.079193
DS-59764	NOTCH1	9:139412204-139412389	75.29	Breast	Carcinoma, Ductal	1.87674	-1.83893
DS-59764	NOTCH1	9:139412589-139412744	16.03	Breast	Carcinoma, Ductal	1.20493	-1.36523
DS-59764	NOTCH1	9:139413043-139413276	71.55	Breast	Carcinoma, Ductal	1.85461	1.02552
DS-59764	NOTCH1	9:139413895-139414017	100.01	Breast	Carcinoma, Ductal	2.00004	-0.294026
DS-59764	NOTCH1	9:139417302-139417640	5.97	Breast	Carcinoma, Ductal	0.775974	-0.562298
DS-59764	NOTCH1	9:139418169-139418431	19.48	Breast	Carcinoma, Ductal	1.28959	1.76446
DS-59764	NOTCH1	9:139438476-139438554	8.46	Breast	Carcinoma, Ductal	0.92737	-0.39914
DS-59764	NOTCH1	9:139440178-139440238	0	Breast	Carcinoma, Ductal		0.798675
DS-59764	NOTCH2	1:120457929-120459317	108.42	Breast	Carcinoma, Ductal	2.03511	-0.341846
DS-59764	NOTCH2	1:120460288-120460385	102.22	Breast	Carcinoma, Ductal	2.00954	0.149527
DS-59764	NOTCH2	1:120461029-120461176	124.57	Breast	Carcinoma, Ductal	2.09541	-0.418073
DS-59764	NOTCH2	1:120461935-120462236	69.46	Breast	Carcinoma, Ductal	1.84173	-0.796197
DS-59764	NOTCH2	1:120462852-120463020	109.39	Breast	Carcinoma, Ductal	2.03898	-0.559769
DS-59764	NOTCH2	1:120464336-120464432	158.81	Breast	Carcinoma, Ductal	2.20088	0.666931
DS-59764	NOTCH2	1:120464859-120465069	123.11	Breast	Carcinoma, Ductal	2.09029	-0.319618
DS-59764	NOTCH2	1:120465259-120465401	59.94	Breast	Carcinoma, Ductal	1.77772	0.025518
DS-59764	NOTCH2	1:120466260-120466607	73.18	Breast	Carcinoma, Ductal	1.86439	-0.0616397
DS-59764	NOTCH2	1:120467928-120468433	173.07	Breast	Carcinoma, Ductal	2.23822	-0.097289
DS-59764	NOTCH2	1:120469122-120469234	39.37	Breast	Carcinoma, Ductal	1.59517	0.509186
DS-59764	NOTCH2	1:120471599-120471835	103.84	Breast	Carcinoma, Ductal	2.01636	-0.729084
DS-59764	NOTCH2	1:120478042-120478227	60.61	Breast	Carcinoma, Ductal	1.78254	0.459427
DS-59764	NOTCH2	1:120479905-120480089	133.44	Breast	Carcinoma, Ductal	2.12529	-0.424474
DS-59764	NOTCH2	1:120480480-120480633	115.36	Breast	Carcinoma, Ductal	2.06206	0.953423
DS-59764	NOTCH2	1:120483178-120483379	71.46	Breast	Carcinoma, Ductal	1.85406	1.13438
DS-59764	NOTCH2	1:120484149-120484377	78.97	Breast	Carcinoma, Ductal	1.89746	-0.0650067
DS-59764	NOTCH2	1:120491037-120491189	190.94	Breast	Carcinoma, Ductal	2.2809	-0.267722
DS-59764	NOTCH2	1:120491630-120491749	214.4	Breast	Carcinoma, Ductal	2.33122	0.295415
DS-59764	NOTCH2	1:120493347-120493460	234.8	Breast	Carcinoma, Ductal	2.3707	-0.0223899
DS-59764	NOTCH2	1:120496166-120496311	231.3	Breast	Carcinoma, Ductal	2.36418	0.473941
DS-59764	NOTCH2	1:120497663-120497855	143.62	Breast	Carcinoma, Ductal	2.15721	-1.10492
DS-59764	NOTCH2	1:120502015-120502125	116.35	Breast	Carcinoma, Ductal	2.06577	0.577474
DS-59764	NOTCH2	1:120506197-120506430	39.23	Breast	Carcinoma, Ductal	1.59362	-0.62276
DS-59764	NOTCH2	1:120508076-120508189	43.19	Breast	Carcinoma, Ductal	1.63538	0.365977
DS-59764	NOTCH2	1:120508999-120509112	292.89	Breast	Carcinoma, Ductal	2.4667	0.616984
DS-59764	NOTCH2	1:120510056-120510244	145.07	Breast	Carcinoma, Ductal	2.16158	0.775178
DS-59764	NOTCH2	1:120510700-120510855	114.2	Breast	Carcinoma, Ductal	2.05767	0.724115
DS-59764	NOTCH2	1:120512134-120512367	92.57	Breast	Carcinoma, Ductal	1.96647	-0.988562
DS-59764	NOTCH2	1:120529583-120529705	114.39	Breast	Carcinoma, Ductal	2.05839	0.425137
DS-59764	NOTCH2	1:120539620-120539955	144.07	Breast	Carcinoma, Ductal	2.15857	-0.672126
DS-59764	NOTCH2	1:120547952-120548211	182.56	Breast	Carcinoma, Ductal	2.26141	-0.783021
DS-59764	NOTCH2	1:120572529-120572610	4.12	Breast	Carcinoma, Ductal	0.614897	-0.033632
DS-59764	NOTCH2	1:120611948-120612020	16.36	Breast	Carcinoma, Ductal	1.21378	-1.19889
DS-59765	NOTCH1	9:139390523-139392010	79.34	Breast	Carcinoma In Situ, Ductal	1.89949	-1.16897
DS-59765	NOTCH1	9:139393351-139393448	575.81	Breast	Carcinoma In Situ, Ductal	2.76028	-1.64885
DS-59765	NOTCH1	9:139393564-139393711	103.09	Breast	Carcinoma In Situ, Ductal	2.01322	-0.715481
DS-59765	NOTCH1	9:139395004-139395299	69.24	Breast	Carcinoma In Situ, Ductal	1.84036	-1.31792
DS-59765	NOTCH1	9:139396200-139396365	46.61	Breast	Carcinoma In Situ, Ductal	1.66848	0.204318
DS-59765	NOTCH1	9:139396453-139396540	91.56	Breast	Carcinoma In Situ, Ductal	1.96171	-0.439516
DS-59765	NOTCH1	9:139396724-139396940	54.34	Breast	Carcinoma In Situ, Ductal	1.73512	-0.948444
DS-59765	NOTCH1	9:139397634-139397782	131.2	Breast	Carcinoma In Situ, Ductal	2.11793	-1.23816
DS-59765	NOTCH1	9:139399125-139399556	42.42	Breast	Carcinoma In Situ, Ductal	1.62757	0.580565
DS-59765	NOTCH1	9:139399762-139400333	57.05	Breast	Carcinoma In Situ, Ductal	1.75626	-2.51388
DS-59765	NOTCH1	9:139400979-139401091	52.19	Breast	Carcinoma In Situ, Ductal	1.71759	0.379524
DS-59765	NOTCH1	9:139401168-139401425	39.31	Breast	Carcinoma In Situ, Ductal	1.5945	-1.07988
DS-59765	NOTCH1	9:139401757-139401889	31	Breast	Carcinoma In Situ, Ductal	1.49136	-0.249027
DS-59765	NOTCH1	9:139402407-139402591	77.48	Breast	Carcinoma In Situ, Ductal	1.88919	-0.869933
DS-59765	NOTCH1	9:139402684-139402837	97.53	Breast	Carcinoma In Situ, Ductal	1.98914	-1.32076
DS-59765	NOTCH1	9:139403322-139403523	15.65	Breast	Carcinoma In Situ, Ductal	1.19451	0.0890727
DS-59765	NOTCH1	9:139404185-139404413	156.43	Breast	Carcinoma In Situ, Ductal	2.19432	-1.92146
DS-59765	NOTCH1	9:139405105-139405257	97.28	Breast	Carcinoma In Situ, Ductal	1.98802	0.433451
DS-59765	NOTCH1	9:139405604-139405723	126.55	Breast	Carcinoma In Situ, Ductal	2.10226	-1.62113
DS-59765	NOTCH1	9:139407473-139407586	429.47	Breast	Carcinoma In Situ, Ductal	2.63293	1.24293
DS-59765	NOTCH1	9:139407844-139407989	145.59	Breast	Carcinoma In Situ, Ductal	2.16313	0.637114
DS-59765	NOTCH1	9:139408962-139409154	48.97	Breast	Carcinoma In Situ, Ductal	1.68993	-0.218623
DS-59765	NOTCH1	9:139409742-139409852	274.13	Breast	Carcinoma In Situ, Ductal	2.43796	-0.104164
DS-59765	NOTCH1	9:139409935-139410168	43.83	Breast	Carcinoma In Situ, Ductal	1.64177	0.269475
DS-59765	NOTCH1	9:139410433-139410546	202.82	Breast	Carcinoma In Situ, Ductal	2.30711	-0.786328
DS-59765	NOTCH1	9:139411724-139411837	49.5	Breast	Carcinoma In Situ, Ductal	1.69461	0.266932
DS-59765	NOTCH1	9:139412204-139412389	231.2	Breast	Carcinoma In Situ, Ductal	2.36399	-0.928816
DS-59765	NOTCH1	9:139412589-139412744	64.96	Breast	Carcinoma In Situ, Ductal	1.81265	0.740037
DS-59765	NOTCH1	9:139413043-139413276	177.28	Breast	Carcinoma In Situ, Ductal	2.24866	-0.127583
DS-59765	NOTCH1	9:139413895-139414017	210.92	Breast	Carcinoma In Situ, Ductal	2.32412	-2.4032
DS-59765	NOTCH1	9:139417302-139417640	22.58	Breast	Carcinoma In Situ, Ductal	1.35372	0.989346
DS-59765	NOTCH1	9:139418169-139418431	35.88	Breast	Carcinoma In Situ, Ductal	1.55485	-1.01694
DS-59765	NOTCH1	9:139438476-139438554	40.3	Breast	Carcinoma In Situ, Ductal	1.60531	1.40898
DS-59765	NOTCH1	9:139440178-139440238	0	Breast	Carcinoma In Situ, Ductal		0.798675
DS-59765	NOTCH2	1:120457929-120459317	115.7	Breast	Carcinoma In Situ, Ductal	2.06333	-0.24005
DS-59765	NOTCH2	1:120460288-120460385	114.48	Breast	Carcinoma In Situ, Ductal	2.05873	0.363361
DS-59765	NOTCH2	1:120461029-120461176	159.91	Breast	Carcinoma In Situ, Ductal	2.20388	0.832037
DS-59765	NOTCH2	1:120461935-120462236	89.56	Breast	Carcinoma In Situ, Ductal	1.95211	0.00450191
DS-59765	NOTCH2	1:120462852-120463020	138.61	Breast	Carcinoma In Situ, Ductal	2.14179	0.207292
DS-59765	NOTCH2	1:120464336-120464432	113.54	Breast	Carcinoma In Situ, Ductal	2.05515	-0.103058
DS-59765	NOTCH2	1:120464859-120465069	144.8	Breast	Carcinoma In Situ, Ductal	2.16077	0.173753
DS-59765	NOTCH2	1:120465259-120465401	61.38	Breast	Carcinoma In Situ, Ductal	1.78803	-0.0263443
DS-59765	NOTCH2	1:120466260-120466607	80.08	Breast	Carcinoma In Situ, Ductal	1.90352	0.26301
DS-59765	NOTCH2	1:120467928-120468433	187.48	Breast	Carcinoma In Situ, Ductal	2.27295	0.11492
DS-59765	NOTCH2	1:120469122-120469234	42.82	Breast	Carcinoma In Situ, Ductal	1.63165	0.70748
DS-59765	NOTCH2	1:120471599-120471835	133.44	Breast	Carcinoma In Situ, Ductal	2.12529	0.295002
DS-59765	NOTCH2	1:120478042-120478227	64	Breast	Carcinoma In Situ, Ductal	1.80618	0.522546
DS-59765	NOTCH2	1:120479905-120480089	181.83	Breast	Carcinoma In Situ, Ductal	2.25967	0.551417
DS-59765	NOTCH2	1:120480480-120480633	92.9	Breast	Carcinoma In Situ, Ductal	1.96802	-0.323085
DS-59765	NOTCH2	1:120483178-120483379	67.8	Breast	Carcinoma In Situ, Ductal	1.83123	0.646173
DS-59765	NOTCH2	1:120484149-120484377	84.51	Breast	Carcinoma In Situ, Ductal	1.92691	0.044335
DS-59765	NOTCH2	1:120491037-120491189	230.81	Breast	Carcinoma In Situ, Ductal	2.36325	0.76489
DS-59765	NOTCH2	1:120491630-120491749	186.88	Breast	Carcinoma In Situ, Ductal	2.27156	-0.296482
DS-59765	NOTCH2	1:120493347-120493460	226.96	Breast	Carcinoma In Situ, Ductal	2.35595	-0.63532
DS-59765	NOTCH2	1:120496166-120496311	163.41	Breast	Carcinoma In Situ, Ductal	2.21328	-0.249019
DS-59765	NOTCH2	1:120497663-120497855	204.68	Breast	Carcinoma In Situ, Ductal	2.31108	1.56746
DS-59765	NOTCH2	1:120502015-120502125	64.51	Breast	Carcinoma In Situ, Ductal	1.80963	-0.207491
DS-59765	NOTCH2	1:120506197-120506430	68.99	Breast	Carcinoma In Situ, Ductal	1.83879	1.67605
DS-59765	NOTCH2	1:120508076-120508189	42.75	Breast	Carcinoma In Situ, Ductal	1.63094	0.183806
DS-59765	NOTCH2	1:120508999-120509112	252.37	Breast	Carcinoma In Situ, Ductal	2.40204	0.0646609
DS-59765	NOTCH2	1:120510056-120510244	155.44	Breast	Carcinoma In Situ, Ductal	2.19156	0.934026
DS-59765	NOTCH2	1:120510700-120510855	95.7	Breast	Carcinoma In Situ, Ductal	1.98091	-0.552782
DS-59765	NOTCH2	1:120512134-120512367	121.25	Breast	Carcinoma In Situ, Ductal	2.08368	-0.0699503
DS-59765	NOTCH2	1:120529583-120529705	95.49	Breast	Carcinoma In Situ, Ductal	1.97996	-0.00912665
DS-59765	NOTCH2	1:120539620-120539955	154.14	Breast	Carcinoma In Situ, Ductal	2.18792	-0.542422
DS-59765	NOTCH2	1:120547952-120548211	237.75	Breast	Carcinoma In Situ, Ductal	2.37612	0.0199102
DS-59765	NOTCH2	1:120572529-120572610	0.96	Breast	Carcinoma In Situ, Ductal	-0.0177288	-0.74347
DS-59765	NOTCH2	1:120611948-120612020	51.19	Breast	Carcinoma In Situ, Ductal	1.70919	0.738836
DS-59777	NOTCH1	9:139390523-139392010	49.78	Breast	Carcinoma, Ductal	1.69705	-0.504273
DS-59777	NOTCH1	9:139393351-139393448	429.13	Breast	Carcinoma, Ductal	2.63259	0.206394
DS-59777	NOTCH1	9:139393564-139393711	66.28	Breast	Carcinoma, Ductal	1.82138	-0.106898
DS-59777	NOTCH1	9:139395004-139395299	52.93	Breast	Carcinoma, Ductal	1.7237	0.610746
DS-59777	NOTCH1	9:139396200-139396365	27.07	Breast	Carcinoma, Ductal	1.43249	0.244629
DS-59777	NOTCH1	9:139396453-139396540	67.31	Breast	Carcinoma, Ductal	1.82808	0.651892
DS-59777	NOTCH1	9:139396724-139396940	31.8	Breast	Carcinoma, Ductal	1.50243	-0.87215
DS-59777	NOTCH1	9:139397634-139397782	74.53	Breast	Carcinoma, Ductal	1.87233	-1.33978
DS-59777	NOTCH1	9:139399125-139399556	17.86	Breast	Carcinoma, Ductal	1.25188	-1.07686
DS-59777	NOTCH1	9:139399762-139400333	46.81	Breast	Carcinoma, Ductal	1.67034	1.02923
DS-59777	NOTCH1	9:139400979-139401091	31.23	Breast	Carcinoma, Ductal	1.49457	0.538351
DS-59777	NOTCH1	9:139401168-139401425	20.47	Breast	Carcinoma, Ductal	1.31112	-1.75905
DS-59777	NOTCH1	9:139401757-139401889	13.98	Breast	Carcinoma, Ductal	1.14551	-1.34113
DS-59777	NOTCH1	9:139402407-139402591	44.55	Breast	Carcinoma, Ductal	1.64885	-0.885323
DS-59777	NOTCH1	9:139402684-139402837	73.42	Breast	Carcinoma, Ductal	1.86581	0.769994
DS-59777	NOTCH1	9:139403322-139403523	10.02	Breast	Carcinoma, Ductal	1.00087	0.45751
DS-59777	NOTCH1	9:139404185-139404413	115.83	Breast	Carcinoma, Ductal	2.06382	0.245418
DS-59777	NOTCH1	9:139405105-139405257	56.6	Breast	Carcinoma, Ductal	1.75282	0.500976
DS-59777	NOTCH1	9:139405604-139405723	86.66	Breast	Carcinoma, Ductal	1.93782	-0.0780033
DS-59777	NOTCH1	9:139407473-139407586	182.18	Breast	Carcinoma, Ductal	2.2605	-0.494415
DS-59777	NOTCH1	9:139407844-139407989	63.44	Breast	Carcinoma, Ductal	1.80236	-1.07149
DS-59777	NOTCH1	9:139408962-139409154	18.63	Breast	Carcinoma, Ductal	1.27021	-2.37633
DS-59777	NOTCH1	9:139409742-139409852	168.43	Breast	Carcinoma, Ductal	2.22642	0.384317
DS-59777	NOTCH1	9:139409935-139410168	29.34	Breast	Carcinoma, Ductal	1.46746	1.14851
DS-59777	NOTCH1	9:139410433-139410546	140.43	Breast	Carcinoma, Ductal	2.14746	0.680497
DS-59777	NOTCH1	9:139411724-139411837	33.31	Breast	Carcinoma, Ductal	1.52257	0.949638
DS-59777	NOTCH1	9:139412204-139412389	156.64	Breast	Carcinoma, Ductal	2.1949	0.637666
[truncated: 2,489 more rows]
